# Supplementary material
Source: PubMed Central journal article supplement (PMC10215310)
Supplement: mmc1.pdf [file mmc1.pdf]

**Supplemental information**

**Mitigating the risk of antimalarial  
resistance via covalent dual-subunit  
inhibition of the *Plasmodium* proteasome**

**Ioanna Deni, Barbara H. Stokes, Kurt E. Ward, Kate J. Fairhurst, Charisse Florida A. Pasaje, Tomas Yeo, Shirin Akbar, Heekuk Park, Ryan Muir, Daniella S. Bick, Wenhui Zhan, Hao Zhang, Yi Jing Liu, Caroline L. Ng, Laura A. Kirkman, Jihad Almaliti, Alexandra E. Gould, Maëlle Duffey, Anthony J. O'Donoghue, Anne-Catrin Uhlemann, Jacquie C. Niles, Paula C.A. da Fonseca, William H. Gerwick, Gang Lin, Matthew Bogyo, and David A. Fidock**

|                                                                                                                                                                                                                                                |         |
|------------------------------------------------------------------------------------------------------------------------------------------------------------------------------------------------------------------------------------------------|---------|
| <b>Figure S1</b> (related to Figures 1 and 2; Table 1; Tables S1 and S2). <b>Profiling of Pf20S <math>\beta</math>2, <math>\beta</math>5 and <math>\beta</math>6 subunit mutants against <i>Plasmodium</i>-selective proteasome inhibitors</b> | page 2  |
| <b>Figure S2</b> (related to Table 1). <b>Resistance to the boronate inhibitor MMV1579506 is mediated by the 20S <math>\beta</math>5 A20V mutation</b>                                                                                         | page 4  |
| <b>Figure S3</b> (related to Figures 1 and 2; Table 1; and Tables S1 and S2). <b>Profiling of 20S beta subunit mutants against selective and non-selective <i>Plasmodium</i> proteasome inhibitors</b>                                         | page 6  |
| <b>Figure S4</b> (related to Table 1 and Table S3). <b>Profiling of 19S regulatory particle mutants against <i>Plasmodium</i>-selective and non-selective proteasome inhibitors</b>                                                            | page 8  |
| <b>Figure S5</b> (related to Table 3). <b>CRISPR/Cas9-mediated editing of <i>P. falciparum</i> 20S <math>\beta</math>5 proteasome mutations</b>                                                                                                | page 10 |
| <b>Figure S6</b> (related to Figure 3 and Table S5). <b>Conditional knock-down parasites demonstrate essentiality for proteasome <math>\beta</math>2 and <math>\beta</math>5 subunits</b>                                                      | page 12 |
| <b>Table S1</b> (related to Figure 1; Figures S1 and S3). <b>EC<sub>50</sub> values (nM) for inhibitor-selected proteasome mutant lines and proteasome wild-type controls</b>                                                                  | page 13 |
| <b>Table S2</b> (related to Figure 2; Table S1; Figure S1 and S3). <b>EC<sub>50</sub> fold shifts (nM) for inhibitor-selected proteasome mutant lines relative to their respective parental lines</b>                                          | page 15 |
| <b>Table S3</b> (related to Table 1 and Figure S4). <b>EC<sub>50</sub> values (nM) for inhibitor-selected proteasome mutant lines and proteasome wild-type controls</b>                                                                        | page 16 |
| <b>Table S4</b> (related to Table 3 and Figure S5). <b>EC<sub>50</sub> values (nM) for CRISPR/Cas9-edited proteasome mutant lines compared with selected lines and proteasome wild-type controls</b>                                           | page 17 |
| <b>Table S5</b> (related to Figure 3). <b>EC<sub>50</sub> values (nM) for 20S proteasome <math>\beta</math>2 and <math>\beta</math>5 conditional knockdown lines</b>                                                                           | page 18 |
| <b>Table S6</b> (related to Figure 4). <b>EC<sub>50</sub> values (nM) for inhibitor-selected proteasome mutant lines and proteasome wild-type control</b>                                                                                      | page 18 |
| <b>Table S7</b> (related to Figure 4 and Table S6). <b>IC<sub>50</sub> fold shifts (nM) for selected proteasome mutant lines relative to their parental line Dd2-B2</b>                                                                        | page 19 |
| <b>Table S8</b> (related to Figure 3 and Figure S5). <b>Oligonucleotides employed in this study</b>                                                                                                                                            | page 20 |
| <b>Supplementary References</b>                                                                                                                                                                                                                | page 20 |

**Figure S1**

**Vinyl sulfones**

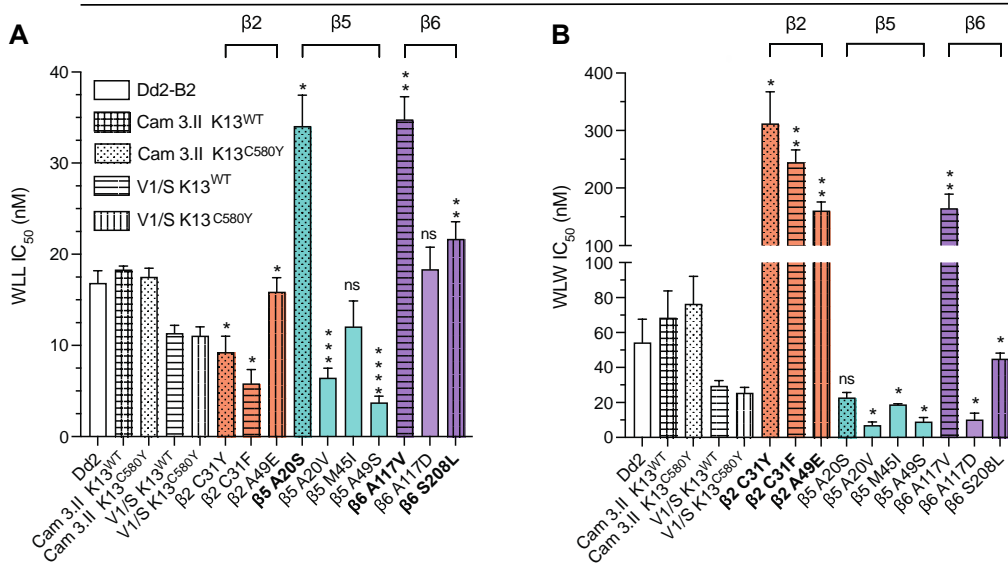

**Epoxyketones**

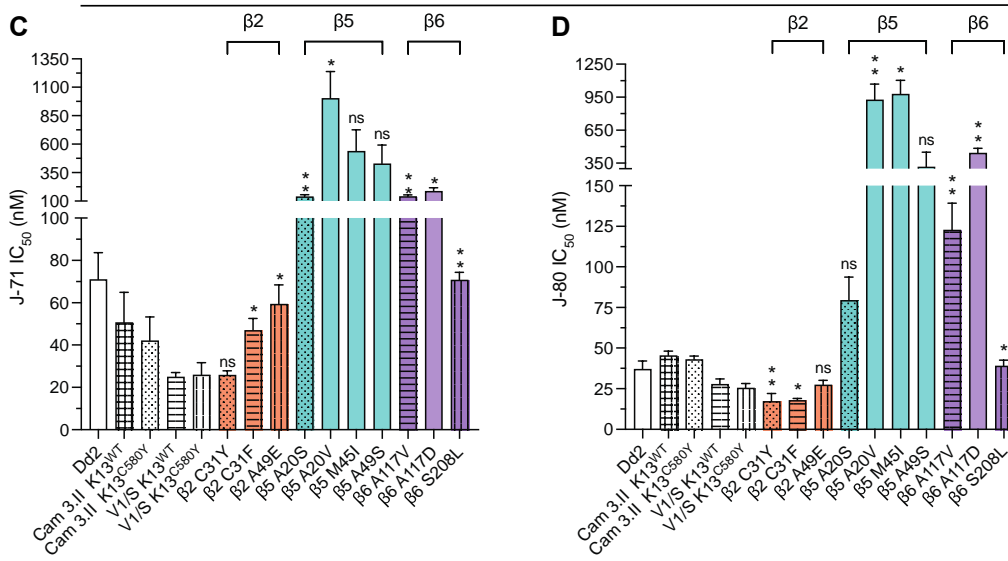

**Asparagine ethylenediamines**

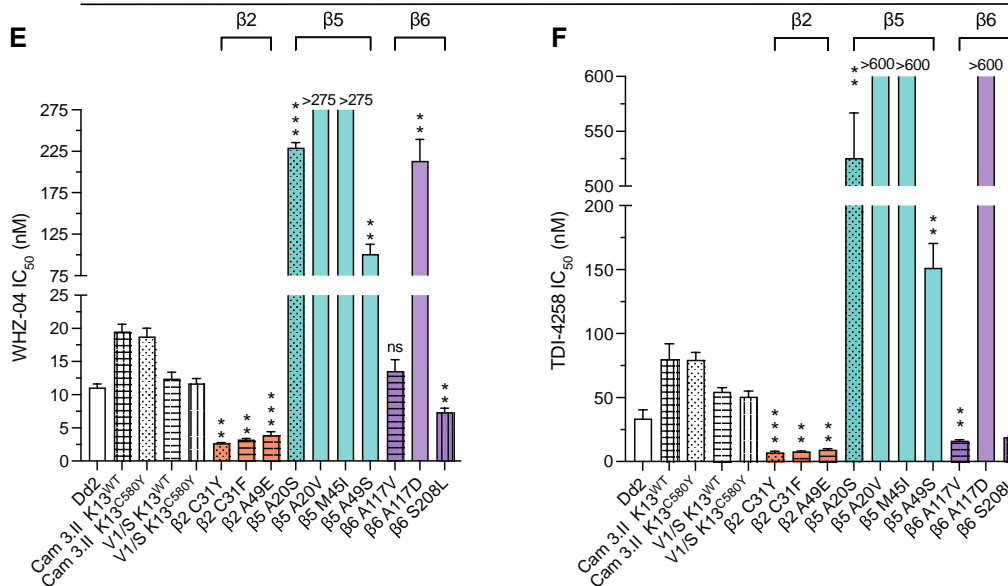

**Figure S1. Profiling of Pf20S  $\beta$ 2,  $\beta$ 5 and  $\beta$ 6 subunit mutants against *Plasmodium*-selective proteasome inhibitors. (A-F)  $IC_{50}$  values for *P. falciparum* 20S proteasome wild-type lines (Dd2, Cam3.II K13<sup>WT</sup>, Cam3.II K13<sup>C580Y</sup>, V1/S K13<sup>WT</sup> and V1/S K13<sup>C580Y</sup>) and  $\beta$  subunit mutant lines tested against a panel of *Plasmodium*-selective inhibitors in 72 h dose-response assays. Cam3.II K13<sup>WT</sup> and Cam3.II K13<sup>C580Y</sup> are isogenic and differ solely at the artemisinin resistance locus *K13*, as are V1/S K13<sup>WT</sup> and V1/S K13<sup>C580Y</sup>. For all compounds tested, the K13 C580Y mutation did not affect parasite susceptibility to proteasome inhibition. Compounds tested included: **(A, B)** vinyl sulfones (WLL and WLW), **(C, D)** epoxyketones (J-71 and J-80), and **(E, F)** asparagine ethylenediamines (WHZ-04 and TDI-4258). Lines indicated in bold were obtained from resistance selection studies with the compound being tested. Results show means  $\pm$  SEM from 3 to 4 independent assays conducted in duplicate (see **Table S1**). Statistical significance was calculated using unpaired *t* tests with Welch's correction, comparing selected lines to their respective parental lines (detailed in **Table 1** and indicated here using hatching patterns specific to each background strain). \* $p < 0.05$ ; \*\* $p < 0.01$ ; \*\*\* $p < 0.001$ ; \*\*\*\* $p < 0.0001$ ; ns, not significant.**

**Figure S2**

**A**

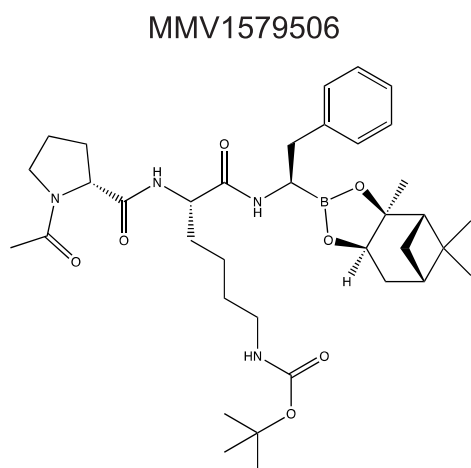

**B**

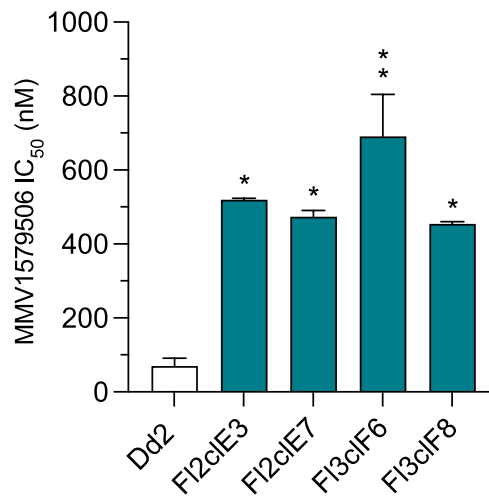

**C**

| Name       | Chemical Class | Starting Selective Pressure | Recrudescence                          | Selected Proteasome Mutation | IC <sub>50</sub> fold shift against selection compound |
|------------|----------------|-----------------------------|----------------------------------------|------------------------------|--------------------------------------------------------|
| MMV1579506 | boronate       | 3×IC <sub>50</sub> (70 nM)  | 3/3 flasks at 2×10 <sup>9</sup> /flask | A20V                         | 9.8×                                                   |

**D**

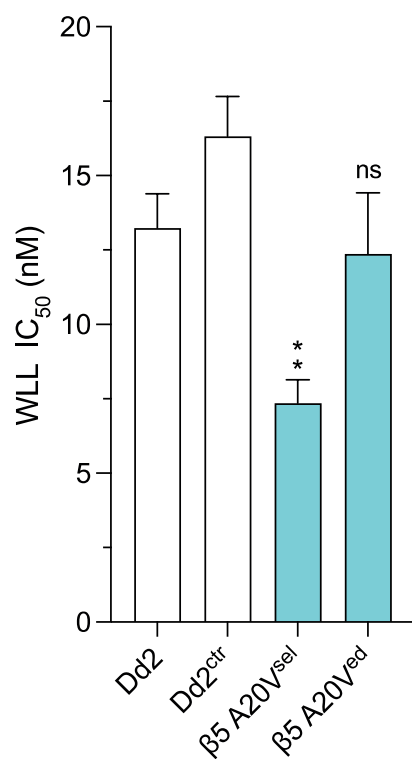

**E**

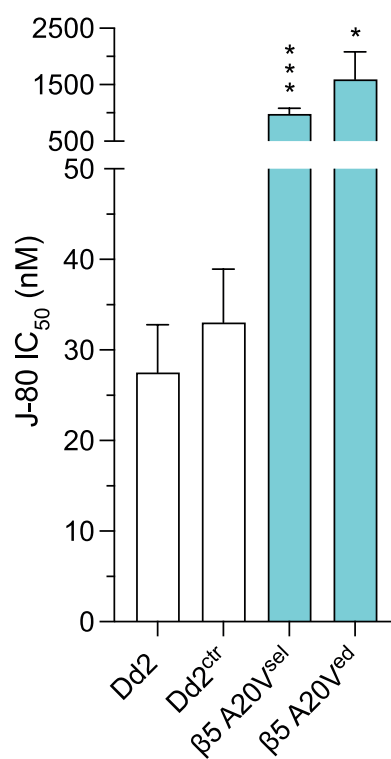

**F**

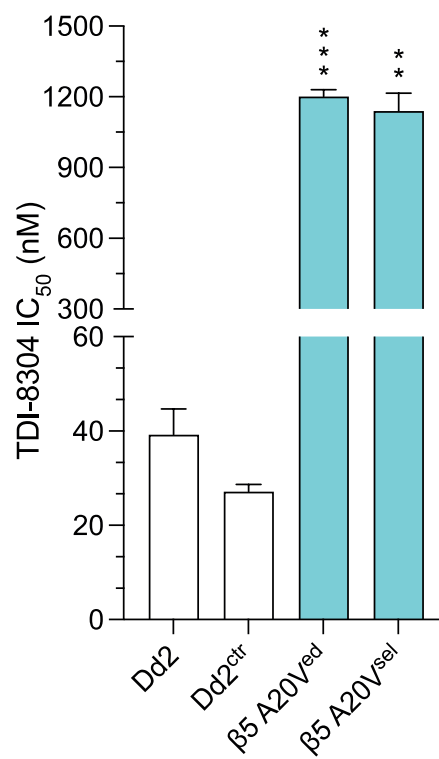

**Figure S2. Resistance to the boronate inhibitor MMV1579506 is mediated by the 20S  $\beta$ 5 A20V mutation.** **(A)** Chemical structure of MMV1579506, a reversible, covalent boronate inhibitor. **(B)**  $IC_{50}$  values for *P. falciparum* Dd2 clones generated from MMV1579506 *in vitro* resistance selections tested against the selection compound. Whole-genome sequencing of MMV1579506-selected clones (from two separate flasks, FI2 and FI3, each inoculated with  $2 \times 10^9$  parasites) revealed a  $\beta$ 5 A20V mutation in all four clones. This mutation was also present in all three bulk cultures from the recrudescence flasks. Selected lines harboring the A20V mutation exhibited up to 9.8-fold increases in their  $IC_{50}$  values relative to the wild-type Dd2 parental line. **(C)** Summary of MMV1579506 selections that yielded resistant parasites. All three flasks inoculated at  $2 \times 10^9$  parasites were positive. Separately, all 4 wells inoculated with  $2.5 \times 10^6$  parasites per well and all 3 wells inoculated at  $2 \times 10^7$  parasites/well remained negative (not shown). **(D-F)**  $IC_{50}$  values for Dd2 and drug-selected or CRISPR/Cas9 gene-edited  $\beta$ 5 A20V lines ( $\beta$ 5 A20V<sup>sel</sup> and  $\beta$ 5 A20V<sup>ed</sup>, respectively) tested against **(D)** WLL, **(E)** J-80, or **(F)** TDI-8304 in 72 h dose-response assays. The Dd2 control (ctr) line expresses silent binding-site mutations at the CRISPR/Cas9 cut site. Results show means  $\pm$  SEM from assays conducted on 3 to 5 independent occasions in duplicate (see **Table S2**). Statistical significance was calculated using unpaired *t* tests with Welch's correction, comparing selected or edited lines to the Dd2 parent. \* $p < 0.05$ ; \*\* $p < 0.01$ ; \*\*\* $p < 0.001$ ; \*\*\*\* $p < 0.0001$ ; ns, not significant.

**Figure S3**

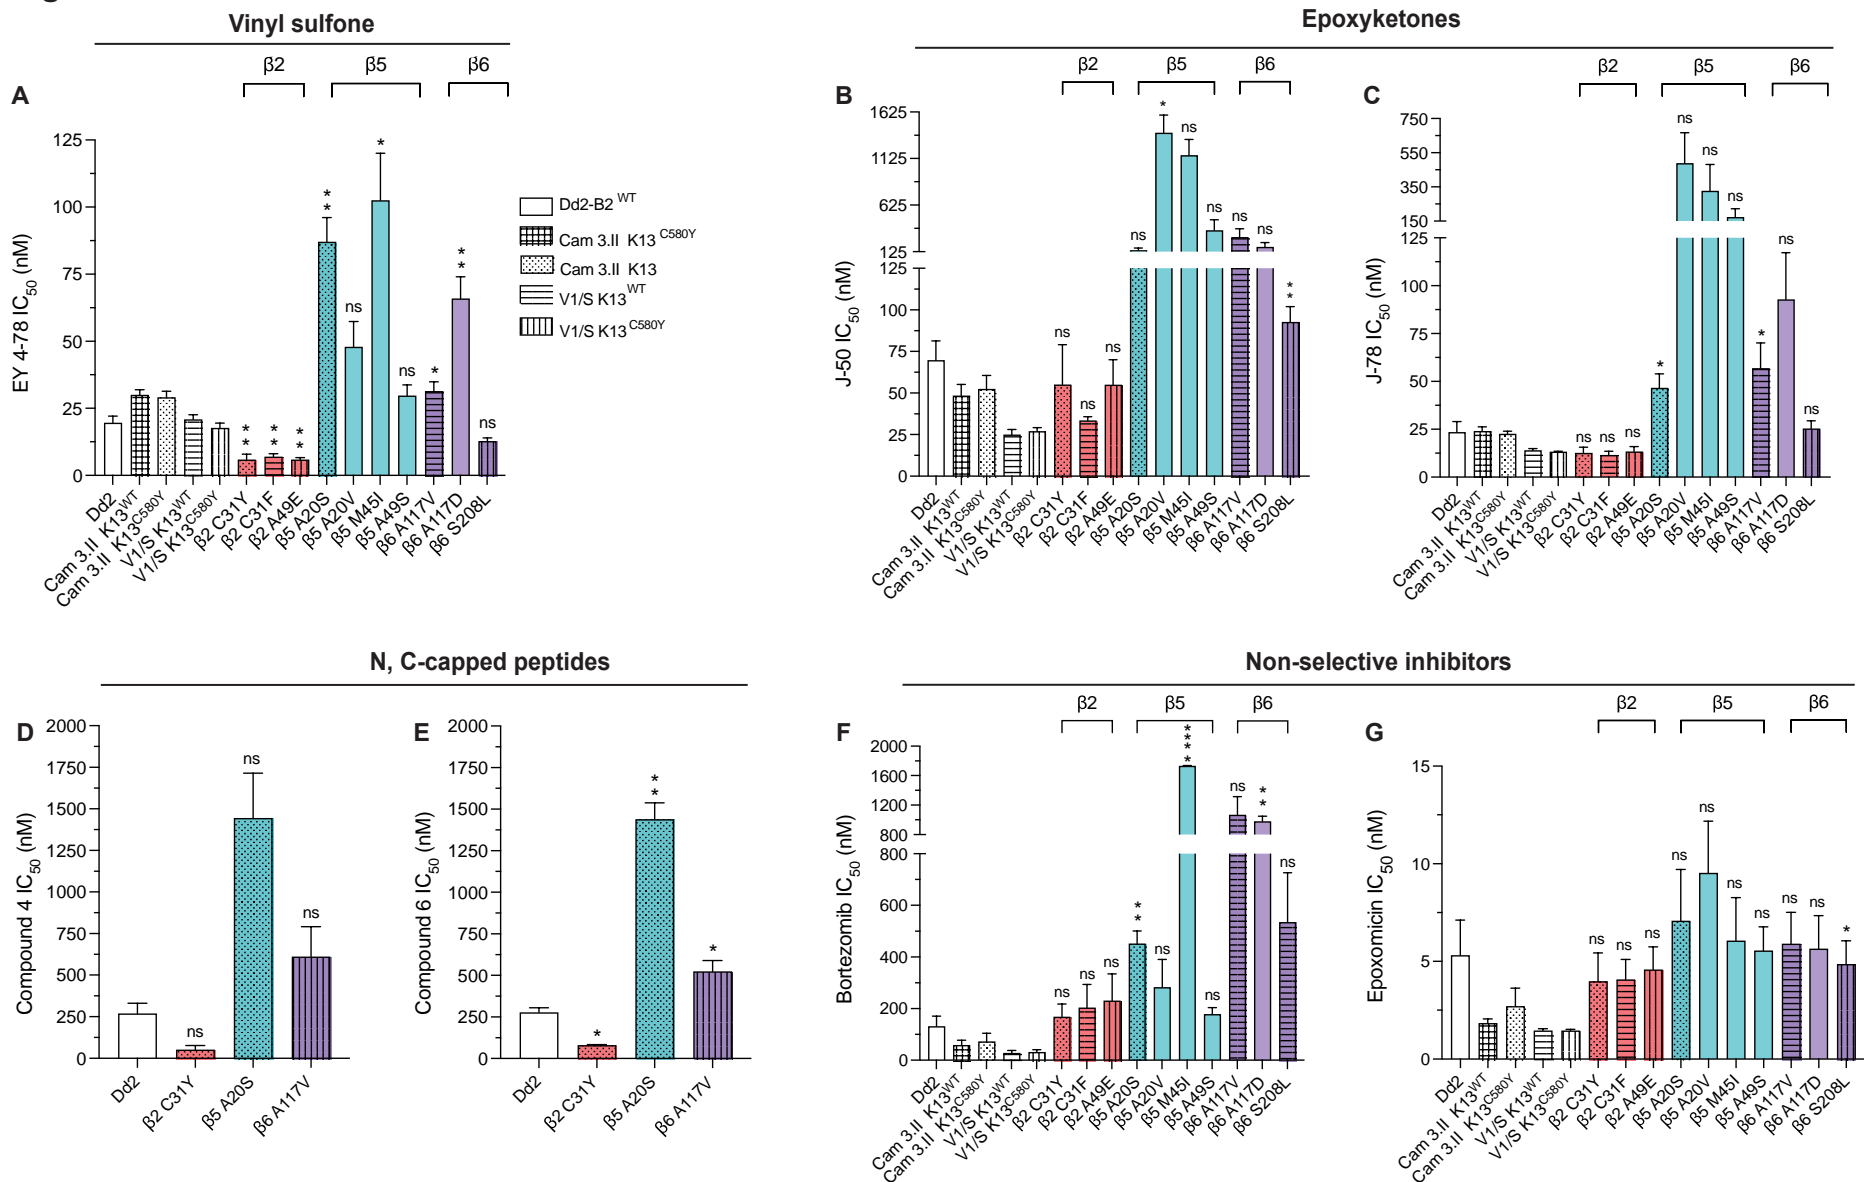

**Figure S3. Profiling of 20S beta subunit mutants against selective and non-selective *Plasmodium* proteasome inhibitors.** IC<sub>50</sub> values for *P. falciparum* 20S proteasome wild-type lines (Dd2, Cam3.II K13<sup>WT</sup>, Cam3.II K13<sup>C580Y</sup>, V1/S K13<sup>WT</sup> and V1/S K13<sup>C580Y</sup>) and mutant lines tested against additional *Plasmodium*-selective and non-selective inhibitors in 72 h dose-response assays, as described in **Figure 1**. Selective compounds tested included **(A)** EY 4-78 (vinyl sulfone), **(B, C)** J-50 and J-78 (epoxyketones), and **(D, E)** Compounds 4 and 6 (N,C-capped peptides). Non-selective inhibitors included **(F)** bortezomib and **(G)** epoxomicin. Results show means  $\pm$  SEM from 3 to 4 independent assays conducted in duplicate (see **Table S1**). Statistical significance was calculated using unpaired *t* tests with Welch's correction, comparing selected lines to their respective parental lines (detailed in **Table 1** and indicated here using hatching patterns specific to each background strain). \**p*<0.05; \*\**p*<0.01; \*\*\**p*<0.001; \*\*\*\**p*<0.0001; ns, not significant.



**Figure S4**

**Vinyl sulfones**

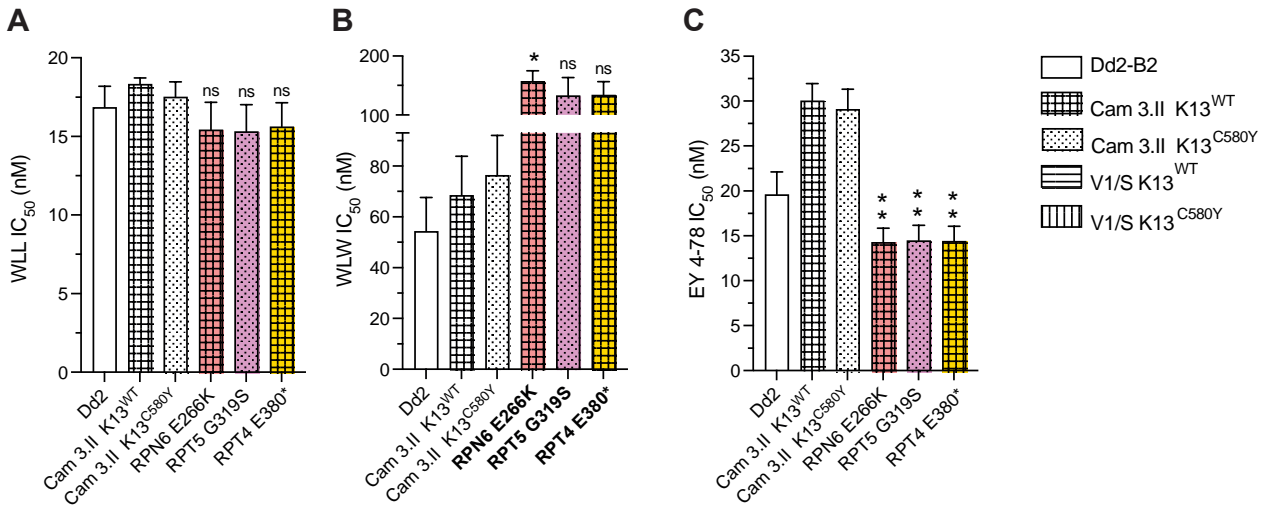

**Epoxyketones**

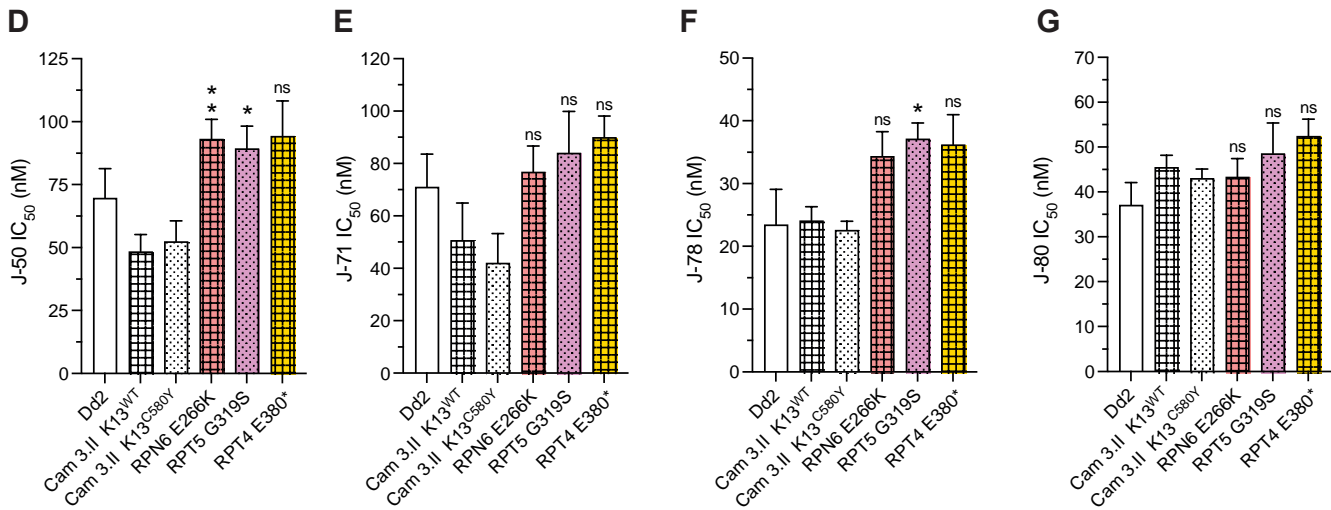

**Asparagine ethylenediamines**

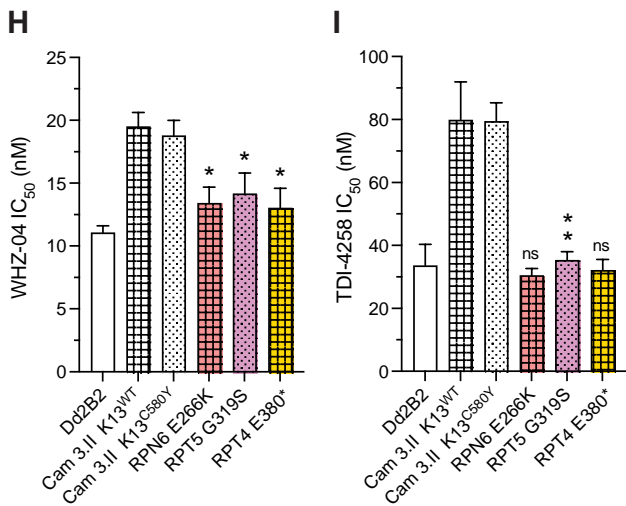

**Non-selective inhibitors**

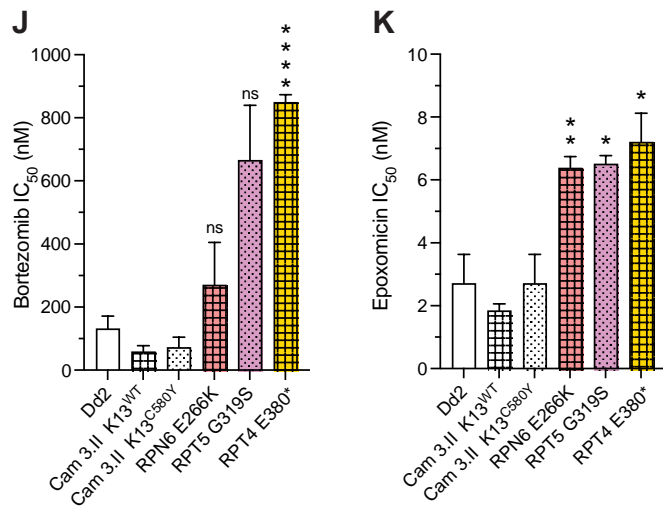

**Figure S4. Profiling of 19S regulatory particle mutants against *Plasmodium*-selective and non-selective proteasome inhibitors.** IC<sub>50</sub> values for *P. falciparum* 19S proteasome wild-type lines (Dd2, Cam3.II K13<sup>WT</sup>, Cam3.II K13<sup>C580Y</sup>, V1/S K13<sup>WT</sup> and V1/S K13<sup>C580Y</sup>) and mutant lines tested against *Plasmodium*-selective and non-selective inhibitors in 72 h dose-response assays, as described in **Figure 1**. Compounds tested included: **(A-C)** WLL, WLW and EY 4-78 (vinyl sulfones), **(D-G)** J-50, J-71, J-78 and J-80 (epoxyketones), **(H, I)** WHZ-04 and TDI-4258 (AsnEDAs), **(J)** bortezomib and **(K)** epoxomicin. Lines indicated in bold were obtained from resistance selection studies with the test compound. Results show means  $\pm$  SEM from 3 to 4 independent assays conducted in duplicate (see **Table S1**). Statistical significance was calculated using unpaired *t* tests with Welch's correction, comparing selected lines to their respective parental lines (detailed in **Table 1** and illustrated here using matched hatching patterns). \**p*<0.05; \*\**p*<0.01; \*\*\**p*<0.001; \*\*\*\**p*<0.0001; ns, not significant.

**Figure S5**

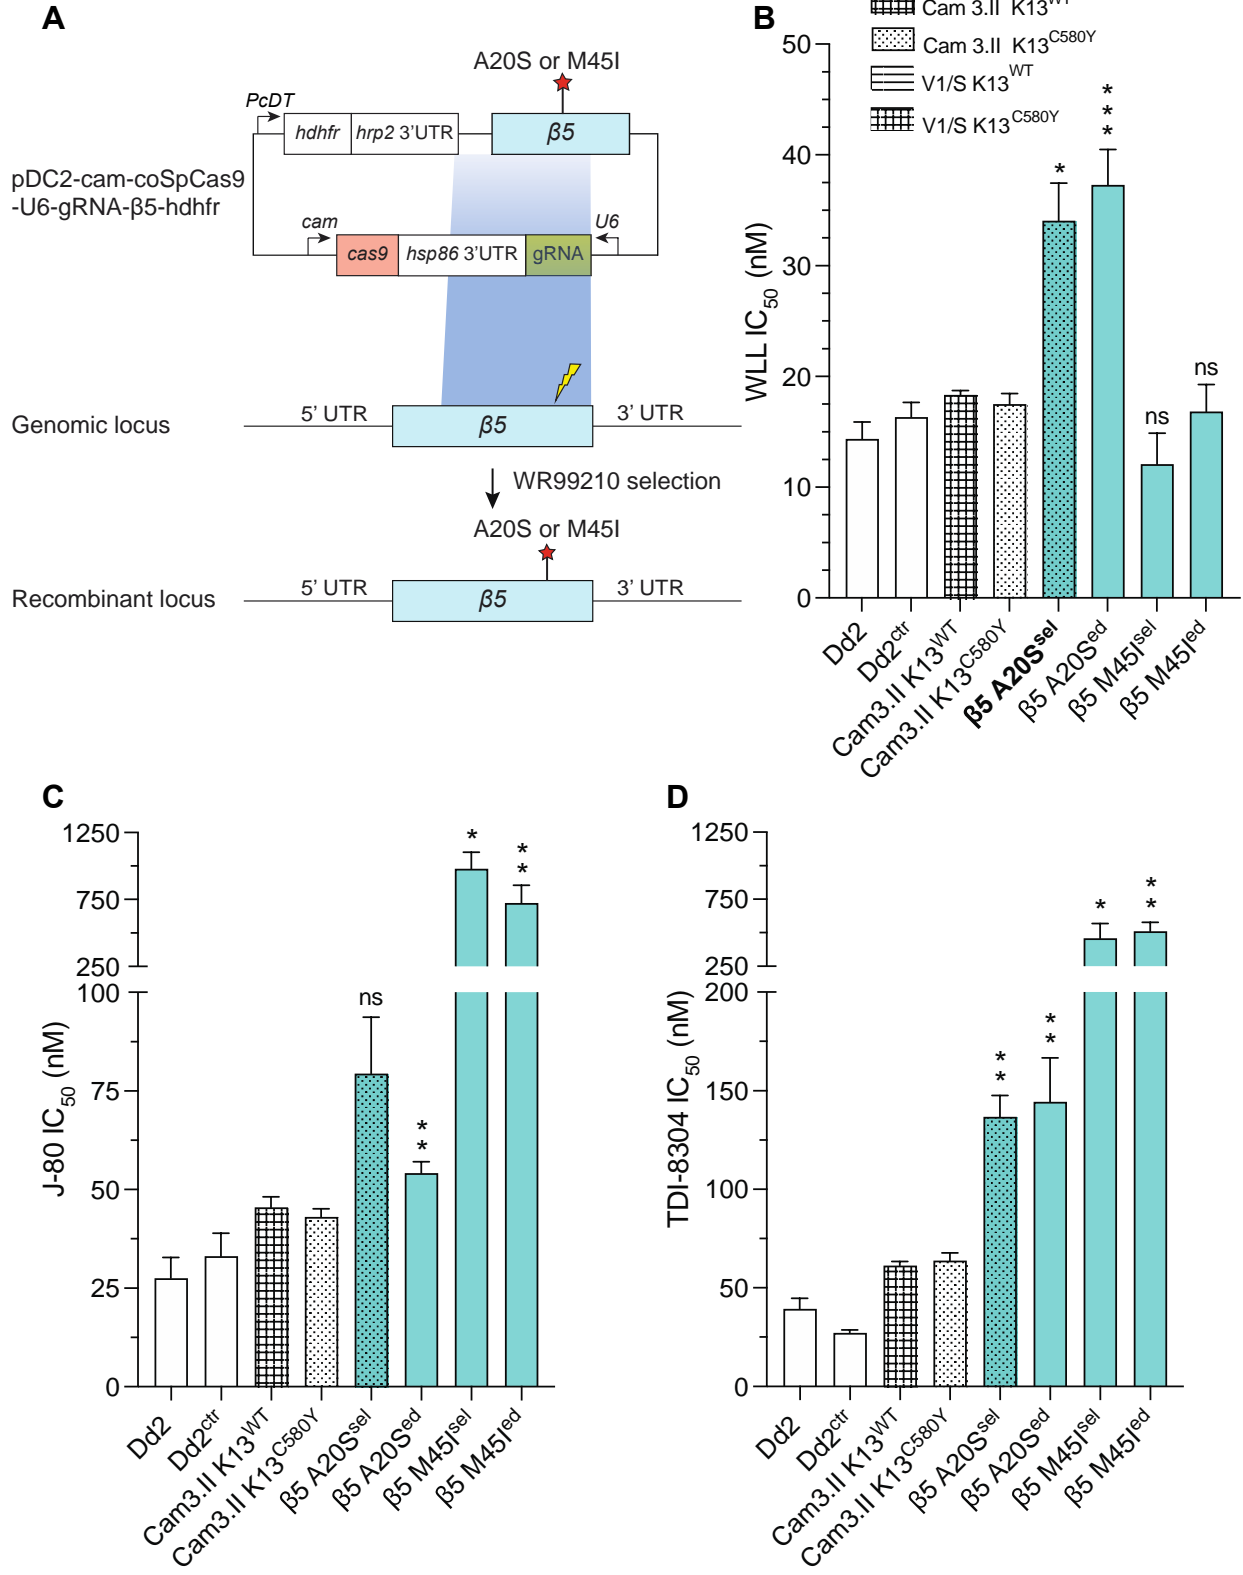

**Figure S5. CRISPR/Cas9-mediated editing of *P. falciparum* 20S  $\beta$ 5 proteasome mutations.** **(A)** Schematic of the CRISPR/Cas9 plasmid used to introduce  $\beta$ 5 point mutations into wild-type Dd2 parasites. This plasmid includes the *Cas9* and the  $\beta$ 5-specific guide RNA (gRNA) expression cassettes (driven by the *calmodulin* and *U6* promoters, respectively), the human dihydrofolate reductase (*dhfr*) selectable marker (driven by the *P. chabaudi dhfrs-ts* (*PcDT*) promoter), and a  $\beta$ 5-specific template for homology-directed repair. **(B-D)**  $IC_{50}$  values for selected or edited  $\beta$ 5 A20S, A20V or M45I, and control (ctr) transgenic lines tested against **(B)** WLL, **(C)** J-80, or **(D)** TDI-8304 in 72 h dose-response assays. Bolded lines were selected for resistance to the test compound. Results show means  $\pm$  SEM from assays conducted on 3 to 5 independent occasions in duplicate (see **Table S4**). Statistical significance was calculated using unpaired *t* tests with Welch's correction, comparing edited lines to the Dd2 parent or selected lines to their respective parental line (detailed in **Table 1** and illustrated here using matched hatching patterns). \* $p < 0.05$ ; \*\* $p < 0.01$ ; \*\*\* $p < 0.001$ ; \*\*\*\* $p < 0.0001$ ; ns, not significant.

**Figure S6**

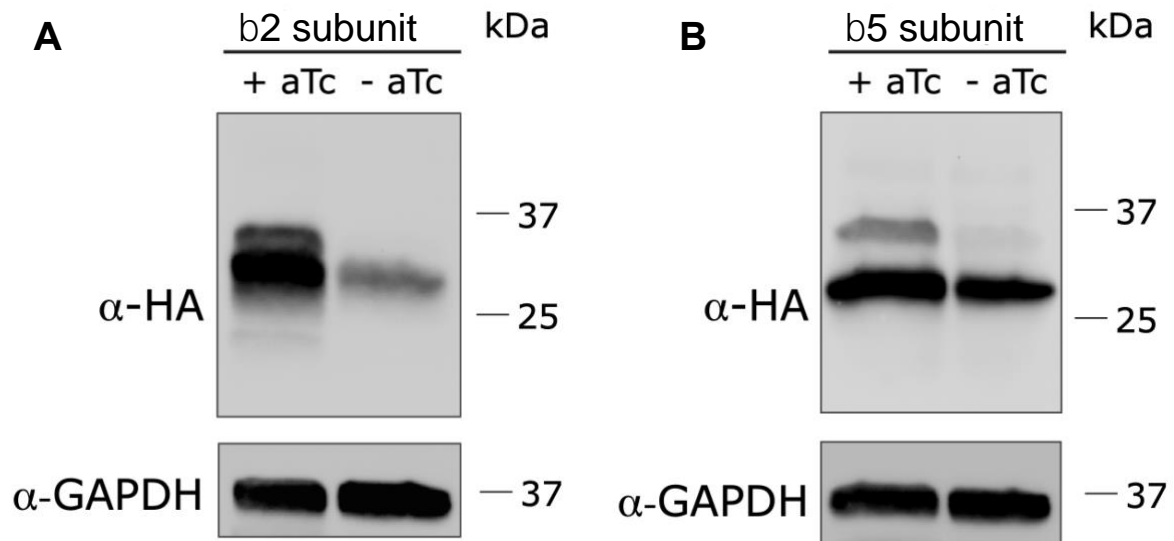

**Figure S6. Conditional knock-down parasites demonstrate essentiality for proteasome  $\beta$ 2 and  $\beta$ 5 subunits.** Western blots of (A)  $\beta$ 2 and (B)  $\beta$ 5 cKD lines cultured in 500 nM (+aTc) or 0 nM aTc (-aTc). Parasites showed minimal residual protein upon aTc removal. The doublet bands for the subunits represent the precursor and mature forms, present as higher and lower molecular weights. These subunits are initially synthesized as inactive precursors with an N-terminal pro-peptide that is cleaved off to form the mature proteins when the complex is fully assembled<sup>1-3</sup>. Antibodies to GAPDH were used to confirm equivalent protein loading across conditions.

**Table S1. IC<sub>50</sub> values (nM) for inhibitor-selected proteasome mutant lines and proteasome wild-type controls.**

| Compounds         | Dd2  |      |   | Cam 3.II K13 <sup>WT</sup> |      |    | Cam 3.II K13 <sup>C580Y</sup> |      |    | V1/S K13 <sup>WT</sup> |      |    | V1/S K13 <sup>C580Y</sup> |     |    | β2 C31Y (Cam3.II K13 <sup>C580Y</sup> ) |             |   |         | β2 C31F (V1/S K13 <sup>WT</sup> ) |             |    |         | β2 A49E (V1/S K13 <sup>C580Y</sup> ) |             |    |         |
|-------------------|------|------|---|----------------------------|------|----|-------------------------------|------|----|------------------------|------|----|---------------------------|-----|----|-----------------------------------------|-------------|---|---------|-----------------------------------|-------------|----|---------|--------------------------------------|-------------|----|---------|
|                   | Mean | SEM  | N | Mean                       | SEM  | N  | Mean                          | SEM  | N  | Mean                   | SEM  | N  | Mean                      | SEM | N  | Mean                                    | SEM         | N | p value | Mean                              | SEM         | N  | p value | Mean                                 | SEM         | N  | p value |
| <b>WLL</b>        | 16.8 | 1.3  | 8 | 18.3                       | 0.4  | 3  | 17.5                          | 1.0  | 3  | 11.4                   | 0.8  | 4  | 11.1                      | 1.0 | 4  | 9.3                                     | 1.8         | 4 | 0.012   | 5.8                               | 1.6         | 4  | 0.029   | 15.9                                 | 1.6         | 4  | 0.047   |
| <b>WLW</b>        | 54.3 | 13.3 | 6 | 68.4                       | 15.4 | 3  | 76.4                          | 15.7 | 3  | 29.5                   | 3.0  | 10 | 25.5                      | 3.2 | 10 | <b>312</b>                              | <b>55.3</b> | 3 | 0.042   | <b>245</b>                        | <b>21.8</b> | 4  | 0.002   | <b>161</b>                           | <b>15.0</b> | 3  | 0.010   |
| <b>EY 4-78</b>    | 19.6 | 2.5  | 4 | 30.0                       | 1.9  | 3  | 29.1                          | 2.2  | 3  | 20.9                   | 1.8  | 4  | 17.7                      | 1.8 | 4  | 5.8                                     | 2.1         | 3 | 0.002   | 7.0                               | 1.1         | 4  | 0.004   | 5.9                                  | 0.7         | 4  | 0.004   |
| <b>J-50</b>       | 69.7 | 11.7 | 6 | 48.5                       | 6.7  | 3  | 52.4                          | 8.2  | 3  | 24.9                   | 3.2  | 4  | 27.0                      | 2.2 | 4  | 55.0                                    | 2.3         | 4 | 0.924   | 33.4                              | 2.3         | 4  | 0.089   | 55.0                                 | 15.1        | 2  | 0.310   |
| <b>J-71</b>       | 71.0 | 12.6 | 8 | 50.7                       | 14.3 | 3  | 42.1                          | 11.2 | 3  | 25.0                   | 2.0  | 4  | 25.8                      | 5.8 | 4  | 25.9                                    | 1.9         | 3 | 0.285   | 47.0                              | 5.6         | 4  | 0.024   | 59.3                                 | 9.1         | 4  | 0.026   |
| <b>J-78</b>       | 23.4 | 5.6  | 5 | 24.1                       | 2.2  | 3  | 22.6                          | 1.4  | 3  | 13.9                   | 1.0  | 4  | 13.3                      | 0.2 | 4  | 12.4                                    | 3.1         | 3 | 0.065   | 11.5                              | 2.0         | 4  | 0.447   | 13.4                                 | 2.6         | 3  | 0.969   |
| <b>J-80</b>       | 37.1 | 5.0  | 5 | 45.5                       | 2.7  | 3  | 43.1                          | 2.1  | 3  | 27.8                   | 3.2  | 4  | 25.5                      | 2.7 | 4  | 17.2                                    | 4.8         | 4 | 0.008   | 17.9                              | 1.0         | 4  | 0.048   | 27.4                                 | 2.8         | 4  | 0.636   |
| <b>WHZ-04</b>     | 11.1 | 0.6  | 6 | 19.5                       | 1.1  | 3  | 18.8                          | 1.2  | 3  | 12.4                   | 1.0  | 4  | 11.7                      | 0.7 | 4  | 2.7                                     | 0.1         | 4 | 0.006   | 3.2                               | 0.2         | 4  | 0.002   | 3.9                                  | 0.5         | 4  | 0.0002  |
| <b>TDI-4258</b>   | 33.6 | 6.7  | 6 | 79.8                       | 12.1 | 2  | 79.4                          | 6.0  | 2  | 54.5                   | 3.3  | 3  | 50.7                      | 4.5 | 3  | 7.1                                     | 1.0         | 4 | 0.001   | 7.7                               | 0.6         | 4  | 0.004   | 9.2                                  | 0.8         | 4  | 0.010   |
| <b>Compound 4</b> | 269  | 61.8 | 2 | --                         | --   | -- | --                            | --   | -- | --                     | --   | -- | --                        | --  | -- | 52.0                                    | 25.0        | 2 | 0.140   | --                                | --          | -- | --      | --                                   | --          | -- | --      |
| <b>Compound 6</b> | 277  | 28.7 | 3 | --                         | --   | -- | --                            | --   | -- | --                     | --   | -- | --                        | --  | -- | 81.0                                    | 3.3         | 3 | 0.020   | --                                | --          | -- | --      | --                                   | --          | -- | --      |
| <b>Bortezomib</b> | 132  | 39.6 | 8 | 59.0                       | 18.1 | 3  | 72.1                          | 32.4 | 2  | 27.9                   | 10.1 | 4  | 31.6                      | 9.1 | 4  | 168                                     | 50.1        | 4 | 0.184   | 204                               | 89.5        | 4  | 0.144   | 231                                  | 104         | 4  | 0.152   |
| <b>Epoxomicin</b> | 5.3  | 1.8  | 7 | 1.8                        | 0.2  | 3  | 2.7                           | 0.9  | 3  | 1.5                    | 0.1  | 4  | 1.5                       | 0.1 | 4  | 4.0                                     | 1.5         | 4 | 0.499   | 4.1                               | 1.0         | 5  | 0.065   | 4.6                                  | 1.2         | 5  | 0.055   |

SEM: standard error of the mean; N: number of biological repeats (with technical duplicates); p values were determined by comparison between the variant lines and their isogenic proteasome wild-type parental lines using unpaired t tests with Welch's correction. Brackets following mutant parasite names indicate the parental line. Mean and SEM values shown in red with bold text indicate the mutations selected with that particular compound.

**Table S1 (continued). IC<sub>50</sub> values (nM) for inhibitor-selected proteasome mutant lines and proteasome wild-type controls.**

| Compounds         | β5 A20S (Cam3.II K13 <sup>CS80Y</sup> ) |            |   |         | β5 A20V (Dd2-B2) |     |    |         | β5 M45I (Dd2-B2) |      |    |         | β5 A49S (Dd2-B2) |             |    |         | β6 A117V (V1/S K13 <sup>WT</sup> ) |            |   |         | β6 A117D (Dd2-B2) |      |    |         | β6 S208L (V1/S K13 <sup>CS80Y</sup> ) |            |    |         |
|-------------------|-----------------------------------------|------------|---|---------|------------------|-----|----|---------|------------------|------|----|---------|------------------|-------------|----|---------|------------------------------------|------------|---|---------|-------------------|------|----|---------|---------------------------------------|------------|----|---------|
|                   | Mean                                    | SEM        | N | p value | Mean             | SEM | N  | p value | Mean             | SEM  | N  | p value | Mean             | SEM         | N  | p value | Mean                               | SEM        | N | p value | Mean              | SEM  | N  | p value | Mean                                  | SEM        | N  | p value |
| <b>WLL</b>        | <b>34.1</b>                             | <b>3.4</b> | 3 | 0.032   | 7.4              | 0.8 | 3  | 0.000   | 12.1             | 2.8  | 3  | 0.222   | 3.7              | 0.7         | 3  | <0.0001 | <b>34.8</b>                        | <b>2.5</b> | 4 | 0.001   | 18.3              | 2.4  | 4  | 0.612   | <b>21.7</b>                           | <b>1.9</b> | 4  | 0.005   |
| <b>WLW</b>        | 22.7                                    | 3.0        | 3 | 0.071   | 6.9              | 1.9 | 4  | 0.016   | 18.8             | 0.4  | 3  | 0.044   | 9.0              | 2.4         | 4  | 0.018   | 165                                | 24.4       | 4 | 0.001   | 10.1              | 3.8  | 3  | 0.020   | 45.0                                  | 3.19       | 2  | 0.015   |
| <b>EY 4-78</b>    | 87.1                                    | 9.0        | 4 | 0.006   | 47.9             | 9.4 | 3  | 0.087   | 103              | 17.6 | 3  | 0.040   | 29.8             | 4.0         | 2  | 0.176   | 31.5                               | 3.5        | 4 | 0.048   | 65.9              | 8.1  | 4  | 0.008   | 12.8                                  | 1.2        | 4  | 0.071   |
| <b>J-50</b>       | 140                                     | 24.3       | 3 | 0.058   | 1,402            | 190 | 3  | 0.020   | 1,160            | 170  | 2  | 0.097   | 355              | 113         | 3  | 0.127   | 280                                | 90.0       | 2 | 0.216   | 175               | 46.5 | 4  | 0.106   | 92.7                                  | 9.3        | 4  | 0.005   |
| <b>J-71</b>       | 139                                     | 16.0       | 4 | 0.004   | 1,004            | 235 | 4  | 0.028   | 539              | 186  | 3  | 0.128   | 430              | 162         | 3  | 0.157   | 142                                | 12.8       | 4 | 0.002   | 187               | 29.0 | 4  | 0.020   | 70.7                                  | 3.6        | 3  | 0.002   |
| <b>J-78</b>       | 46.7                                    | 7.2        | 4 | 0.042   | 488              | 179 | 3  | 0.122   | 327              | 155  | 2  | 0.300   | 174              | 48.0        | 3  | 0.087   | 56.9                               | 13.2       | 4 | 0.018   | 92.8              | 24.5 | 4  | 0.063   | 25.3                                  | 4.12       | 4  | 0.061   |
| <b>J-80</b>       | 79.4                                    | 14.3       | 4 | 0.083   | 927              | 142 | 4  | 0.008   | 979              | 124  | 3  | 0.016   | 317              | 132         | 3  | 0.167   | 123                                | 16.5       | 4 | 0.009   | 441               | 44.6 | 4  | 0.003   | 39.1                                  | 3.5        | 4  | 0.024   |
| <b>WHZ-04</b>     | 229                                     | 6.1        | 3 | 0.001   | 4,619            | 714 | 2  | 0.098   | 547              | 120  | 2  | 0.141   | 101              | 11.9        | 4  | 0.005   | 13.6                               | 1.7        | 4 | 0.591   | 213               | 26.1 | 4  | 0.005   | 7.4                                   | 0.6        | 4  | 0.005   |
| <b>TDI-4258</b>   | 525                                     | 41.2       | 4 | 0.001   | >10,000          | --  | 4  | --      | 1344             | 112  | 2  | 0.054   | <b>151</b>       | <b>19.2</b> | 4  | 0.005   | 16.2                               | 1.0        | 4 | 0.004   | 4,200             | 482  | 3  | 0.013   | 18.9                                  | 1.0        | 4  | 0.016   |
| <b>Compound 4</b> | 1,445                                   | 269        | 2 | 0.129   | --               | --  | -- | --      | --               | --   | -- | --      | --               | --          | -- | --      | 611                                | 181        | 2 | 0.286   | --                | --   | -- | --      | --                                    | --         | -- | --      |
| <b>Compound 6</b> | 1,440                                   | 99.0       | 3 | 0.004   | --               | --  | -- | --      | --               | --   | -- | --      | --               | --          | -- | --      | 523                                | 66         | 3 | 0.047   | --                | --   | -- | --      | --                                    | --         | -- | --      |
| <b>Bortezomib</b> | 452                                     | 49.1       | 4 | 0.003   | 283              | 108 | 6  | 0.234   | 1,732            | 4.5  | 2  | <0.0001 | 178              | 25.9        | 4  | 0.348   | 1,067                              | 248        | 3 | 0.052   | 980               | 69.7 | 3  | 0.001   | 535                                   | 192        | 3  | 0.119   |
| <b>Epoxomicin</b> | 7.1                                     | 2.6        | 4 | 0.180   | 9.5              | 2.7 | 5  | 0.228   | 6.1              | 2.2  | 4  | 0.798   | 5.6              | 1.2         | 4  | 0.916   | 5.9                                | 1.6        | 5 | 0.050   | 5.6               | 1.7  | 5  | 0.897   | 4.9                                   | 1.2        | 5  | 0.046   |

SEM: standard error of the mean; N: number of biological repeats (with technical duplicates); p values were determined by comparison between the variant lines and their isogenic proteasome wild-type parental lines using unpaired t tests with Welch's correction. Brackets following mutant parasite names indicate the parental line. Mean and SEM values shown in red with bold text indicate the mutations selected with that particular compound. Other mutations were selected with compounds not assayed herein: b5 A20V was selected using MMV1579506; b5 M45I was selected using MPI-12; b6 A117D was selected using PKS21004.

**Table S2. IC<sub>50</sub> fold shifts (nM) for inhibitor-selected proteasome mutant lines relative to their respective parental lines.**

| Compounds         | $\beta$ 2 C31Y | $\beta$ 2 C31F | $\beta$ 2 A49E | $\beta$ 5 A20S | $\beta$ 5 A20V | $\beta$ 5 M45I | $\beta$ 5 A49S | $\beta$ 6 A117V | $\beta$ 6 A117D | $\beta$ 6 S208L |
|-------------------|----------------|----------------|----------------|----------------|----------------|----------------|----------------|-----------------|-----------------|-----------------|
|                   | fold shift     | fold shift     | fold shift     | fold shift     | fold shift     | fold shift     | fold shift     | fold shift      | fold shift      | fold shift      |
| <b>WLL</b>        | 0.53           | 0.51           | 1.4            | <b>1.9</b>     | 0.44           | 0.72           | 0.22           | <b>3.1</b>      | 1.1             | <b>2.0</b>      |
| <b>WLW</b>        | <b>4.1</b>     | <b>8.3</b>     | <b>6.3</b>     | 0.30           | 0.13           | 0.35           | 0.17           | 5.6             | 0.19            | 1.8             |
| <b>EY 4-78</b>    | 0.20           | 0.33           | 0.33           | 3.0            | 2.4            | 5.2            | 1.5            | 1.5             | 3.4             | 0.72            |
| <b>J-50</b>       | 1.0            | 1.3            | 2.0            | 2.7            | 20.1           | 16.6           | 5.1            | 11.2            | 2.5             | 3.4             |
| <b>J-71</b>       | 0.62           | 1.9            | 2.3            | 3.3            | 14.1           | 7.6            | 6.1            | 5.7             | 2.6             | 2.7             |
| <b>J-78</b>       | 0.55           | 0.83           | 1.0            | 2.1            | 20.8           | 13.9           | 7.4            | 4.1             | 4.0             | 1.9             |
| <b>J-80</b>       | 0.40           | 0.64           | 1.1            | 1.8            | 25.0           | 26.4           | 8.5            | 4.4             | 11.9            | 1.5             |
| <b>WHZ-04</b>     | 0.14           | 0.26           | 0.33           | 12.2           | 418            | 49.5           | 9.1            | 1.1             | 19.2            | 0.63            |
| <b>TDI-4258</b>   | 0.09           | 0.14           | 0.18           | 6.6            | >300           | 40.0           | <b>4.5</b>     | 0.30            | 125             | 0.37            |
| <b>Compound 4</b> | 0.23           | -              | -              | 5.2            | -              | -              | -              | 2.4             | -               | -               |
| <b>Compound 6</b> | 0.27           | -              | -              | 4.5            | -              | -              | -              | 1.9             | -               | -               |
| <b>Bortezomib</b> | 2.3            | 7.3            | 7.3            | 6.3            | 2.1            | 13.1           | 1.3            | 38.2            | 7.4             | 16.9            |
| <b>Epoxomicin</b> | 1.5            | 2.8            | 3.1            | 2.6            | 1.8            | 1.1            | 1.0            | 4.1             | 1.1             | 3.3             |

Parental lines for each mutant are listed in Table 1. Fold shifts were calculated using mean values documented in Table S1. Values shown in red with bold text indicate the mutations selected with that particular compound. Other mutations were selected with compounds not assayed herein: b5 A20V was selected using MMV1579506; b5 M45I was selected using MPI-12; b6 A117D was selected using PKS21004.



**Table S3. IC<sub>50</sub> values (nM) for inhibitor-selected proteasome mutant lines and proteasome wild-type controls.**

| Compounds         | Dd2  |      |   | Cam 3.II K13 <sup>WT</sup> |      |   | Cam 3.II K13 <sup>C580Y</sup> |      |   | RPN6 E266K |             |          |         | RPT5 G319S |             |   |         | RPT4 E380* |             |   |         |
|-------------------|------|------|---|----------------------------|------|---|-------------------------------|------|---|------------|-------------|----------|---------|------------|-------------|---|---------|------------|-------------|---|---------|
|                   | Mean | SEM  | N | Mean                       | SEM  | N | Mean                          | SEM  | N | Mean       | SEM         | N        | p value | Mean       | SEM         | N | p value | Mean       | SEM         | N | p value |
| <b>WLL</b>        | 16.8 | 1.3  | 8 | 18.3                       | 0.4  | 3 | 17.5                          | 1.0  | 3 | 15.4       | 1.7         | 4        | 0.193   | 15.3       | 1.7         | 4 | 0.175   | 15.6       | 1.5         | 4 | 0.174   |
| <b>WLW</b>        | 54.3 | 13.3 | 6 | 68.4                       | 15.4 | 3 | 76.4                          | 15.7 | 3 | <b>157</b> | <b>17.7</b> | <b>4</b> | 0.019   | <b>133</b> | <b>30.6</b> | 4 | 0.169   | <b>134</b> | <b>22.4</b> | 3 | 0.111   |
| <b>EY 4-78</b>    | 19.6 | 2.5  | 4 | 30.0                       | 1.9  | 3 | 29.1                          | 2.2  | 3 | 14.3       | 1.6         | 4        | 0.002   | 14.5       | 1.7         | 4 | 0.006   | 14.4       | 1.6         | 3 | 0.004   |
| <b>J-50</b>       | 69.7 | 11.7 | 6 | 48.5                       | 6.7  | 3 | 52.4                          | 8.2  | 3 | 93.2       | 7.8         | 4        | 0.007   | 89.3       | 8.9         | 4 | 0.015   | 94.3       | 14.0        | 3 | 0.063   |
| <b>J-71</b>       | 71.0 | 12.6 | 8 | 50.7                       | 14.3 | 3 | 42.1                          | 11.2 | 3 | 76.8       | 9.9         | 4        | 0.210   | 84.0       | 15.9        | 4 | 0.085   | 90.0       | 8.1         | 3 | 0.092   |
| <b>J-78</b>       | 23.4 | 5.6  | 5 | 24.1                       | 2.2  | 3 | 22.6                          | 1.4  | 3 | 28.6       | 6.4         | 4        | 0.101   | 30.0       | 7.3         | 4 | 0.014   | 36.2       | 4.8         | 3 | 0.111   |
| <b>J-80</b>       | 37.1 | 5.0  | 5 | 45.5                       | 2.7  | 3 | 43.1                          | 2.1  | 3 | 43.3       | 4.1         | 4        | 0.674   | 48.6       | 6.8         | 4 | 0.698   | 52.4       | 3.8         | 3 | 0.220   |
| <b>WHZ-04</b>     | 11.1 | 0.6  | 6 | 19.5                       | 1.1  | 3 | 18.8                          | 1.2  | 3 | 13.4       | 1.3         | 4        | 0.016   | 14.2       | 1.7         | 4 | 0.046   | 13.0       | 1.6         | 4 | 0.020   |
| <b>TDI-4258</b>   | 33.6 | 6.7  | 6 | 79.8                       | 12.1 | 2 | 79.4                          | 6.0  | 2 | 30.4       | 2.3         | 4        | 0.143   | 35.3       | 2.7         | 4 | 0.002   | 32.1       | 3.4         | 4 | 0.1365  |
| <b>Bortezomib</b> | 132  | 39.6 | 8 | 59.0                       | 18.1 | 3 | 72.1                          | 32.4 | 2 | 270        | 134         | 3        | 0.276   | 666        | 174         | 3 | 0.072   | 850        | 23.7        | 3 | 0.002   |
| <b>Epoxomicin</b> | 5.3  | 1.8  | 7 | 1.8                        | 0.2  | 3 | 2.7                           | 0.9  | 3 | 4.5        | 1.2         | 5        | 0.001   | 5.0        | 1.0         | 5 | 0.045   | 6.1        | 1.3         | 4 | 0.023   |

SEM: standard error of the mean; N: number of biological repeats (with technical duplicates); *p* values were determined by comparison between the variant lines and their isogenic proteasome wild-type parental lines using unpaired t tests with Welch's correction. Values shown in red with bold text indicate the mutations selected with that particular compound.

**Table S4. IC<sub>50</sub> values (nM) for CRISPR/Cas9-edited proteasome mutant lines compared with selected lines and proteasome wild-type controls.**

| Compound        | Dd2  |     |    | Dd2 <sup>ctr</sup> |     |   |                | Cam 3.II K13 <sup>WT</sup> |     |   | Cam 3.II K13 <sup>C580Y</sup> |     |   | β5 A20S <sup>sel</sup> |            |   |                |
|-----------------|------|-----|----|--------------------|-----|---|----------------|----------------------------|-----|---|-------------------------------|-----|---|------------------------|------------|---|----------------|
|                 | Mean | SEM | N  | Mean               | SEM | N | <i>p</i> value | Mean                       | SEM | N | Mean                          | SEM | N | Mean                   | SEM        | N | <i>p</i> value |
| <b>WLL</b>      | 14.4 | 1.5 | 9  | 16.3               | 1.3 | 5 | 0.506          | 18.3                       | 0.4 | 3 | 17.5                          | 1.0 | 3 | <b>34.1</b>            | <b>3.4</b> | 3 | 0.032          |
| <b>J-80</b>     | 27.5 | 5.3 | 5  | 33.0               | 5.9 | 4 | 0.511          | 45.5                       | 2.7 | 3 | 43.1                          | 2.1 | 3 | 79.4                   | 14.3       | 4 | 0.083          |
| <b>TDI-8304</b> | 39.3 | 5.5 | 11 | 27.2               | 1.5 | 5 | 0.055          | 61.4                       | 2.0 | 4 | 63.9                          | 3.9 | 4 | 137                    | 10.7       | 4 | 0.004          |

**Table S4 (continued). IC<sub>50</sub> values (nM) for CRISPR/Cas9-edited proteasome mutant lines compared with selected lines and proteasome wild-type controls.**

| Compound        | β5 A20S <sup>ed</sup> |            |   |                | β5 M45I <sup>sel</sup> |     |   |                | β5 M45I <sup>ed</sup> |      |   |                | β5 A20V <sup>sel</sup> |      |   |                | β5 A20V <sup>ed</sup> |      |   |                |
|-----------------|-----------------------|------------|---|----------------|------------------------|-----|---|----------------|-----------------------|------|---|----------------|------------------------|------|---|----------------|-----------------------|------|---|----------------|
|                 | Mean                  | SEM        | N | <i>p</i> value | Mean                   | SEM | N | <i>p</i> value | Mean                  | SEM  | N | <i>p</i> value | Mean                   | SEM  | N | <i>p</i> value | Mean                  | SEM  | N | <i>p</i> value |
| <b>WLL</b>      | <b>37.3</b>           | <b>3.2</b> | 5 | 0.001          | 12.1                   | 2.8 | 3 | 0.519          | 16.8                  | 2.4  | 5 | 0.417          | 7.4                    | 0.8  | 3 | 0.003          | 12.4                  | 2.1  | 2 | 0.751          |
| <b>J-80</b>     | 54.1                  | 2.9        | 5 | 0.004          | 979                    | 124 | 3 | 0.016          | 722                   | 134  | 5 | 0.007          | 985                    | 97.2 | 6 | 0.0002         | 1,597                 | 486  | 3 | 0.048          |
| <b>TDI-8304</b> | 144                   | 22.3       | 5 | 0.008          | 460                    | 108 | 6 | 0.011          | 512                   | 66.0 | 4 | 0.005          | 1,140                  | 75.6 | 3 | 0.005          | 1,201                 | 28.8 | 3 | 0.0004         |

SEM, standard error of the mean; N, number of biological repeats (with technical duplicates). β5 A20S<sup>sel</sup>: *P. falciparum* lines generated from selections with WLL. β5 M45I<sup>sel</sup>: *P. falciparum* lines generated from selections with MPI-12. β5 A20S<sup>ed</sup> and β5 M45I<sup>ed</sup>: *P. falciparum* lines generated by introducing β5 A20S and β5 M45I mutations into parental Dd2 (B2 clone) using CRISPR/Cas9. Dd2-B2<sup>ctr</sup>: *P. falciparum* line generated by introducing wild type β5 sequence into parental Dd2-B2 using CRISPR/Cas9. *p* values were determined by comparing the shift in IC<sub>50</sub> between the variant lines and parental Dd2-B2 using unpaired t tests with Welch's correction. These values were generated as a separate set from those reported in Table S1. Values shown in red with bold text indicate the mutation selected with that particular compound.

**Table S5. IC<sub>50</sub> values (nM) for 20S proteasome β2 and β5 conditional knockdown lines.**

| Compounds          | β2 conditional knockdown |     |   |           |     |   |         |           |      |   | β5 conditional knockdown |      |     |           |      |     |   |           |      |     |   |         |
|--------------------|--------------------------|-----|---|-----------|-----|---|---------|-----------|------|---|--------------------------|------|-----|-----------|------|-----|---|-----------|------|-----|---|---------|
|                    | 50 nM aTc                |     |   | 20 nM aTc |     |   |         | 15 nM aTc |      |   | 50 nM aTc                |      |     | 20 nM aTc |      |     |   | 10 nM aTc |      |     |   |         |
|                    | Mean                     | SEM | N | Mean      | SEM | N | p value | Mean      | SEM  | N | p value                  | Mean | SEM | N         | Mean | SEM | N | p value   | Mean | SEM | N | p value |
| <b>WLL</b>         | 7.5                      | 0.6 | 4 | 5.6       | 0.2 | 4 | 0.049   | 3.0       | 0.4  | 4 | 0.002                    | 8.3  | 0.6 | 4         | 7.1  | 0.5 | 5 | 0.146     | 4.1  | 0.3 | 5 | 0.001   |
| <b>EY 4-78</b>     | 9.3                      | 0.7 | 4 | 4.6       | 0.4 | 4 | 0.000   | 3.2       | 0.7  | 4 | 0.001                    | 7.6  | 0.2 | 4         | 6.3  | 0.4 | 4 | 0.038     | 4.5  | 0.2 | 4 | <0.0001 |
| <b>J-71</b>        | 32.0                     | 0.7 | 4 | 14.0      | 1.5 | 4 | 0.000   | 8.3       | 1.3  | 4 | <0.0001                  | 24.2 | 1.2 | 4         | 23.8 | 2.1 | 4 | 0.873     | 11.6 | 1.1 | 4 | 0.000   |
| <b>J-80</b>        | 20.1                     | 1.4 | 4 | 7.2       | 0.7 | 4 | 0.001   | 3.5       | 1.3  | 4 | 0.0001                   | 13.1 | 0.7 | 4         | 12.3 | 0.5 | 4 | 0.384     | 4.8  | 1.1 | 4 | 0.001   |
| <b>TDI-8304</b>    | 24.0                     | 0.6 | 4 | 11.9      | 0.4 | 4 | <0.0001 | 7.8       | 0.7  | 4 | <0.0001                  | 10.3 | 0.4 | 4         | 10.1 | 0.5 | 4 | 0.685     | 5.8  | 0.3 | 4 | 0.0002  |
| <b>Chloroquine</b> | 2.7                      | 0.2 | 4 | 3.0       | 0.2 | 4 | 0.394   | 3.3       | 0.25 | 2 | 0.199                    | 4.7  | 0.6 | 4         | 4.9  | 0.4 | 4 | 0.789     | 4.9  | 0.4 | 4 | 0.683   |

Conditional knockdown lines were generated in NF54 parasites (unlike the selection and gene editing studies performed in other strains and reported in separate tables). SEM: standard error of the mean; N: number of biological repeats (with technical duplicates). *p* values were determined by comparing the IC<sub>50</sub> values of parasites cultured under 10, 15 or 20 nM aTc (to cause a partial knockdown) with those cultured at 50 nM (no knockdown), using unpaired t tests with Welch's correction.

**Table S6. IC<sub>50</sub> values (nM) for inhibitor-selected proteasome mutant lines and proteasome wild-type control.**

| Compounds       | Dd2  |     |    | β5 M45R    |            |   |         | β5 M45V    |             |   |         | β5 A50V    |            |   |         | β6 N151Y    |            |   |         | β6 S157L      |              |   |         |
|-----------------|------|-----|----|------------|------------|---|---------|------------|-------------|---|---------|------------|------------|---|---------|-------------|------------|---|---------|---------------|--------------|---|---------|
|                 | Mean | SEM | N  | Mean       | SEM        | N | p value | Mean       | SEM         | N | p value | Mean       | SEM        | N | p value | Mean        | SEM        | N | p value | Mean          | SEM          | N | p value |
| <b>J-71</b>     | 33.8 | 2.3 | 16 | 288        | 30.0       | 4 | 0.003   | 369        | 35.0        | 4 | 0.002   | <b>104</b> | <b>5.5</b> | 4 | 0.0002  | 24.1        | 2.2        | 4 | 0.013   | 71.4          | 5.7          | 4 | 0.003   |
| <b>J-80</b>     | 23.0 | 1.7 | 11 | <b>807</b> | <b>129</b> | 4 | 0.004   | <b>266</b> | <b>21.7</b> | 4 | 0.002   | 69.4       | 4.4        | 4 | 0.001   | 16.8        | 2.8        | 4 | 0.138   | 123           | 9.9          | 4 | 0.000   |
| <b>TDI-8304</b> | 13.3 | 0.7 | 9  | 3.7        | 0.9        | 4 | <0.0001 | 8,800      | 372         | 3 | 0.002   | 25.6       | 1.0        | 3 | <0.0001 | <b>22.0</b> | <b>1.1</b> | 4 | 0.002   | <b>34,858</b> | <b>3,617</b> | 5 | 0.001   |
| <b>WLL</b>      | 11.9 | 0.6 | 11 | 6.3        | 0.5        | 4 | <0.0001 | 6.9        | 0.5         | 4 | <0.0001 | 11.7       | 0.6        | 4 | 0.850   | 8.2         | 0.8        | 4 | 0.008   | 12.0          | 1.0          | 4 | 0.925   |
| <b>EY 4-78</b>  | 22.1 | 1.6 | 11 | 30.6       | 3.8        | 4 | 0.104   | 116        | 11.4        | 4 | 0.003   | 23.3       | 3.9        | 4 | 0.788   | 11.9        | 2.3        | 4 | 0.011   | 159           | 8.0          | 4 | 0.0003  |

SEM: standard error of the mean; N: number of biological repeats (with technical duplicates). β6 S157L and β6 N151Y: *P. falciparum* lines generated from selections with TDI-8304. β5 A50V: *P. falciparum* line generated from selections with J-71. β5 M45V and β5 M45R: *P. falciparum* lines (F2 D9 and F3 A2, respectively) generated from selections with J-80. *p* values were determined by comparing the shift in IC<sub>50</sub> between the variant lines and parental Dd2-B2 using unpaired t tests with Welch's correction. This data set was generated separately from the data reported in Table S1. Values shown in red with bold text indicate the mutations selected with that particular compound.

**Table S7. IC<sub>50</sub> fold shifts (nM) for selected proteasome mutant lines relative to their parental line Dd2-B2.**

| Compounds       | β5 M45R     | β5 M45V     | β5 A50V    | β6 N151Y   | β6 S157L     |
|-----------------|-------------|-------------|------------|------------|--------------|
|                 | fold shift  | fold shift  | fold shift | fold shift | fold shift   |
| <b>J-71</b>     | 8.5         | 10.9        | <b>3.1</b> | 0.71       | 2.1          |
| <b>J-80</b>     | <b>35.1</b> | <b>11.6</b> | 3.0        | 0.73       | 5.3          |
| <b>TDI-8304</b> | 0.28        | 662         | 1.9        | <b>1.7</b> | <b>2,621</b> |
| <b>WLL</b>      | 0.53        | 0.58        | 0.98       | 0.69       | 1.0          |
| <b>EY 4-78</b>  | 1.4         | 5.2         | 1.1        | 0.54       | 7.2          |

Fold shifts were calculated using mean values documented in Table S6. Values shown in red with bold text indicate the mutations selected with that particular compound.

**Table S8. Oligonucleotides employed in this study.**

| Name | Nucleotide sequence (5'-3')                                  | Description                                                  | Lab name |
|------|--------------------------------------------------------------|--------------------------------------------------------------|----------|
| p1   | TATTATATTAGGAACAATGGCAGG                                     | $\beta$ 5 gRNA 1 BbsI fwd (gRNA for gene editing)            | p8349    |
| p2   | AAACCCTGCCATTGTTCCCTAATAT                                    | $\beta$ 5 gRNA 1 BbsI rev (gRNA for gene editing)            | p8350    |
| p3   | TATTTAAAAGATCCCATAGATGCT                                     | $\beta$ 5 gRNA 2 BbsI fwd (gRNA for gene editing)            | p8351    |
| p4   | AAACAGCATCTATGGGATCTTTTA                                     | $\beta$ 5 gRNA 2 BbsI rev (gRNA for gene editing)            | p8352    |
| p5   | AGAGGTACCGAGCTCGAATTCATGGTAATAGCAAGTGATGAAAGC                | $\beta$ 5 gs3226 InFusion EcoRI fwd (donor for gene editing) | p8394    |
| p6   | CGAAAAGTGCCACCTGACGTCTGAATCTAAAATAGAATAAGCATATGTACTACC       | $\beta$ 5 gs3226 InFusion AatII rev (donor for gene editing) | p8395    |
| p7   | GTACGGTACAAACCCGGAATTCGAGCTCGGATTTATATCTGTAGAGAAGATGCATAAGT  | $\beta$ 2 RHR fwd (cKD)                                      | NA       |
| p8   | GGGTATTAGACCTAGGGATAACAGGGTAATCCTTGAGATATTAAACTACAATAAAAAACA | $\beta$ 2 RHR rev (cKD)                                      | NA       |
| p9   | TTATATGGGATACATCCCCA                                         | $\beta$ 2 gRNA target site (cKD)                             | NA       |
| p10  | GTACGGTACAAACCCGGAATTCGAGCTCGGACAAAAGGATCAATATGTTATGTGAA     | $\beta$ 5 RHR fwd (cKD)                                      | NA       |
| p11  | GGGTATTAGACCTAGGGATAACAGGGTAATGGCTAGTCCATAACATTACCT          | $\beta$ 5 RHR rev (cKD)                                      | NA       |
| p12  | TTTAGAGATGGTGGTTCAGG                                         | $\beta$ 5 gRNA target site (cKD)                             | NA       |

cKD, conditional knock-down. Fwd, forward. Rev, reverse. RHR, right homology region. NA, not applicable (cloning performed in the Niles Lab).

## Supplementary References

1. Seemuller, E., Lupas, A., and Baumeister, W. (1996). Autocatalytic processing of the 20S proteasome. *Nature* 382, 468-471.
2. Chen, P., and Hochstrasser, M. (1996). Autocatalytic subunit processing couples active site formation in the 20S proteasome to completion of assembly. *Cell* 86, 961-972.
3. Le Tallec, B., Barrault, M.B., Courbeyrette, R., Guerois, R., Marsolier-Kergoat, M.C., and Peyroche, A. (2007). 20S proteasome assembly is orchestrated by two distinct pairs of chaperones in yeast and in mammals. *Mol. Cell* 27, 660-674.
