# Supplementary material
Source: PubMed Central journal article supplement (PMC10215310)
Supplement: mmc2.pdf [file mmc2.pdf]

# Cell Chemical Biology

## Mitigating the risk of antimalarial resistance via covalent dual-subunit inhibition of the *Plasmodium* proteasome

### Graphical abstract

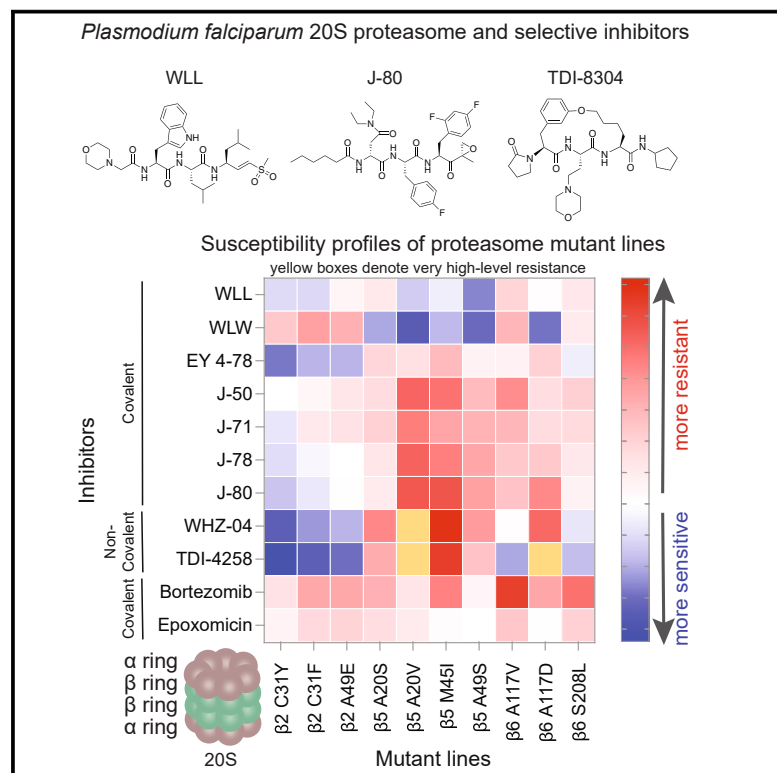

### Authors

Ioanna Deni, Barbara H. Stokes, Kurt E. Ward, ..., Gang Lin, Matthew Bogyo, David A. Fidock

### Correspondence

df2260@cumc.columbia.edu

### In brief

Inhibitors of the *Plasmodium falciparum* proteasome have emerged as leading antimalarial candidates. Herein, Deni and Stokes et al. profile a range of diverse chemotypes and identify the vinyl sulfone WLL as the least susceptible to resistance, likely attributable to its covalent, irreversible binding to the  $\beta$ 2 and  $\beta$ 5 catalytic subunits.

### Highlights

- Multiple proteasome-specific chemotypes can potentially inhibit *P. falciparum* growth
- Resistance can arise via mutations in the  $\beta$ 2,  $\beta$ 5 or  $\beta$ 6 subunits of the 20S proteasome core particle, or in the 19S regulatory particle
- WLL has a minimal resistance risk, attributable to its covalent binding to both  $\beta$ 2 and  $\beta$ 5
- Resistance to some chemotypes can produce collateral sensitivity to other compounds

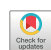

Article

# Mitigating the risk of antimalarial resistance via covalent dual-subunit inhibition of the *Plasmodium* proteasome

Ioanna Deni,<sup>1,16,20</sup> Barbara H. Stokes,<sup>1,17,20</sup> Kurt E. Ward,<sup>1</sup> Kate J. Fairhurst,<sup>1</sup> Charisse Florida A. Pasaje,<sup>2</sup> Tomas Yeo,<sup>1</sup> Shirin Akbar,<sup>3</sup> Heekuk Park,<sup>4</sup> Ryan Muir,<sup>5</sup> Daniella S. Bick,<sup>1</sup> Wenhui Zhan,<sup>6,18</sup> Hao Zhang,<sup>6</sup> Yi Jing Liu,<sup>6</sup> Caroline L. Ng,<sup>7,8,9</sup> Laura A. Kirkman,<sup>6,10</sup> Jehad Almaliti,<sup>11,12</sup> Alexandra E. Gould,<sup>13</sup> Maëlle Duffey,<sup>14,19</sup> Anthony J. O'Donoghue,<sup>15</sup> Anne-Catrin Uhlemann,<sup>4</sup> Jacquelin C. Niles,<sup>2</sup> Paula C.A. da Fonseca,<sup>3</sup> William H. Gerwick,<sup>11,15</sup> Gang Lin,<sup>6</sup> Matthew Bogyo,<sup>5</sup> and David A. Fidock<sup>1,4,21,\*</sup>

<sup>1</sup>Center for Malaria Therapeutics and Antimicrobial Resistance and Department of Microbiology and Immunology, Columbia University Irving Medical Center, New York, NY, USA

<sup>2</sup>Department of Biological Engineering, Massachusetts Institute of Technology, Cambridge, MA, USA

<sup>3</sup>School of Molecular Biosciences, University of Glasgow, Glasgow, Scotland, UK

<sup>4</sup>Division of Infectious Diseases, Department of Medicine, Columbia University Irving Medical Center, New York, NY, USA

<sup>5</sup>Department of Pathology, Stanford University School of Medicine, Stanford, CA, USA

<sup>6</sup>Department of Microbiology and Immunology, Weill Cornell Medicine, New York, NY, USA

<sup>7</sup>Global Center for Health Security, University of Nebraska Medical Center, Omaha, NE, USA

<sup>8</sup>Department of Biology, University of Nebraska Omaha, Omaha, NE, USA

<sup>9</sup>Department of Pathology and Microbiology, University of Nebraska Medical Center, Omaha, NE, USA

<sup>10</sup>Division of Infectious Diseases, Department of Medicine, Weill Cornell Medicine, New York, NY

<sup>11</sup>Scripps Institution of Oceanography, University of California San Diego, La Jolla, CA, USA

<sup>12</sup>Department of Pharmaceutical Sciences, College of Pharmacy, The University of Jordan, Amman, Jordan

<sup>13</sup>Takeda Development Center Americas, Inc., Cambridge, MA 02139, USA

<sup>14</sup>Medicines for Malaria Venture, Geneva, Switzerland

<sup>15</sup>Skaggs School of Pharmacy and Pharmaceutical Sciences, University of California San Diego, La Jolla, CA, USA

<sup>16</sup>Present address: INSERM U1016, Centre National de la Recherche Scientifique (CNRS), Unité Mixte de Recherche (UMR) 8104, Université de Paris, Institut Cochin, Paris, France

<sup>17</sup>Present address: Wellcome Center for Integrative Parasitology, School of Infection & Immunity, University of Glasgow, Glasgow, Scotland, UK

<sup>18</sup>Present address: iCarbonX (Shenzhen) Co., Ltd., Shenzhen, China

<sup>19</sup>Present address: Global Antibiotic Research and Development Partnership, Geneva, Switzerland

<sup>20</sup>These authors contributed equally

<sup>21</sup>Lead contact

\*Correspondence: [df2260@cumc.columbia.edu](mailto:df2260@cumc.columbia.edu)

<https://doi.org/10.1016/j.chembiol.2023.03.002>

## SUMMARY

The *Plasmodium falciparum* proteasome constitutes a promising antimalarial target, with multiple chemotypes potently and selectively inhibiting parasite proliferation and synergizing with the first-line artemisinin drugs, including against artemisinin-resistant parasites. We compared resistance profiles of vinyl sulfone, epoxyketone, macrocyclic peptide, and asparagine ethylenediamine inhibitors and report that the vinyl sulfones were potent even against mutant parasites resistant to other proteasome inhibitors and did not readily select for resistance, particularly WLL that displays covalent and irreversible binding to the catalytic  $\beta 2$  and  $\beta 5$  proteasome subunits. We also observed instances of collateral hypersensitivity, whereby resistance to one inhibitor could sensitize parasites to distinct chemotypes. Proteasome selectivity was confirmed using CRISPR/Cas9-edited mutant and conditional knockdown parasites. Molecular modeling of proteasome mutations suggested spatial contraction of the  $\beta 5$  P1 binding pocket, compromising compound binding. Dual targeting of *P. falciparum* proteasome subunits using covalent inhibitors provides a potential strategy for restoring artemisinin activity and combating the spread of drug-resistant malaria.

## INTRODUCTION

*Plasmodium falciparum* malaria is a leading cause of mortality among young children in sub-Saharan Africa, who comprised

the vast majority of the estimated 619,000 deaths globally in 2021.<sup>1</sup> Recent reports of clinically confirmed *de novo* emergence of *P. falciparum* partial resistance to first-line artemisinin (ART) derivatives in East Africa, following the spread of ART partial

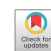

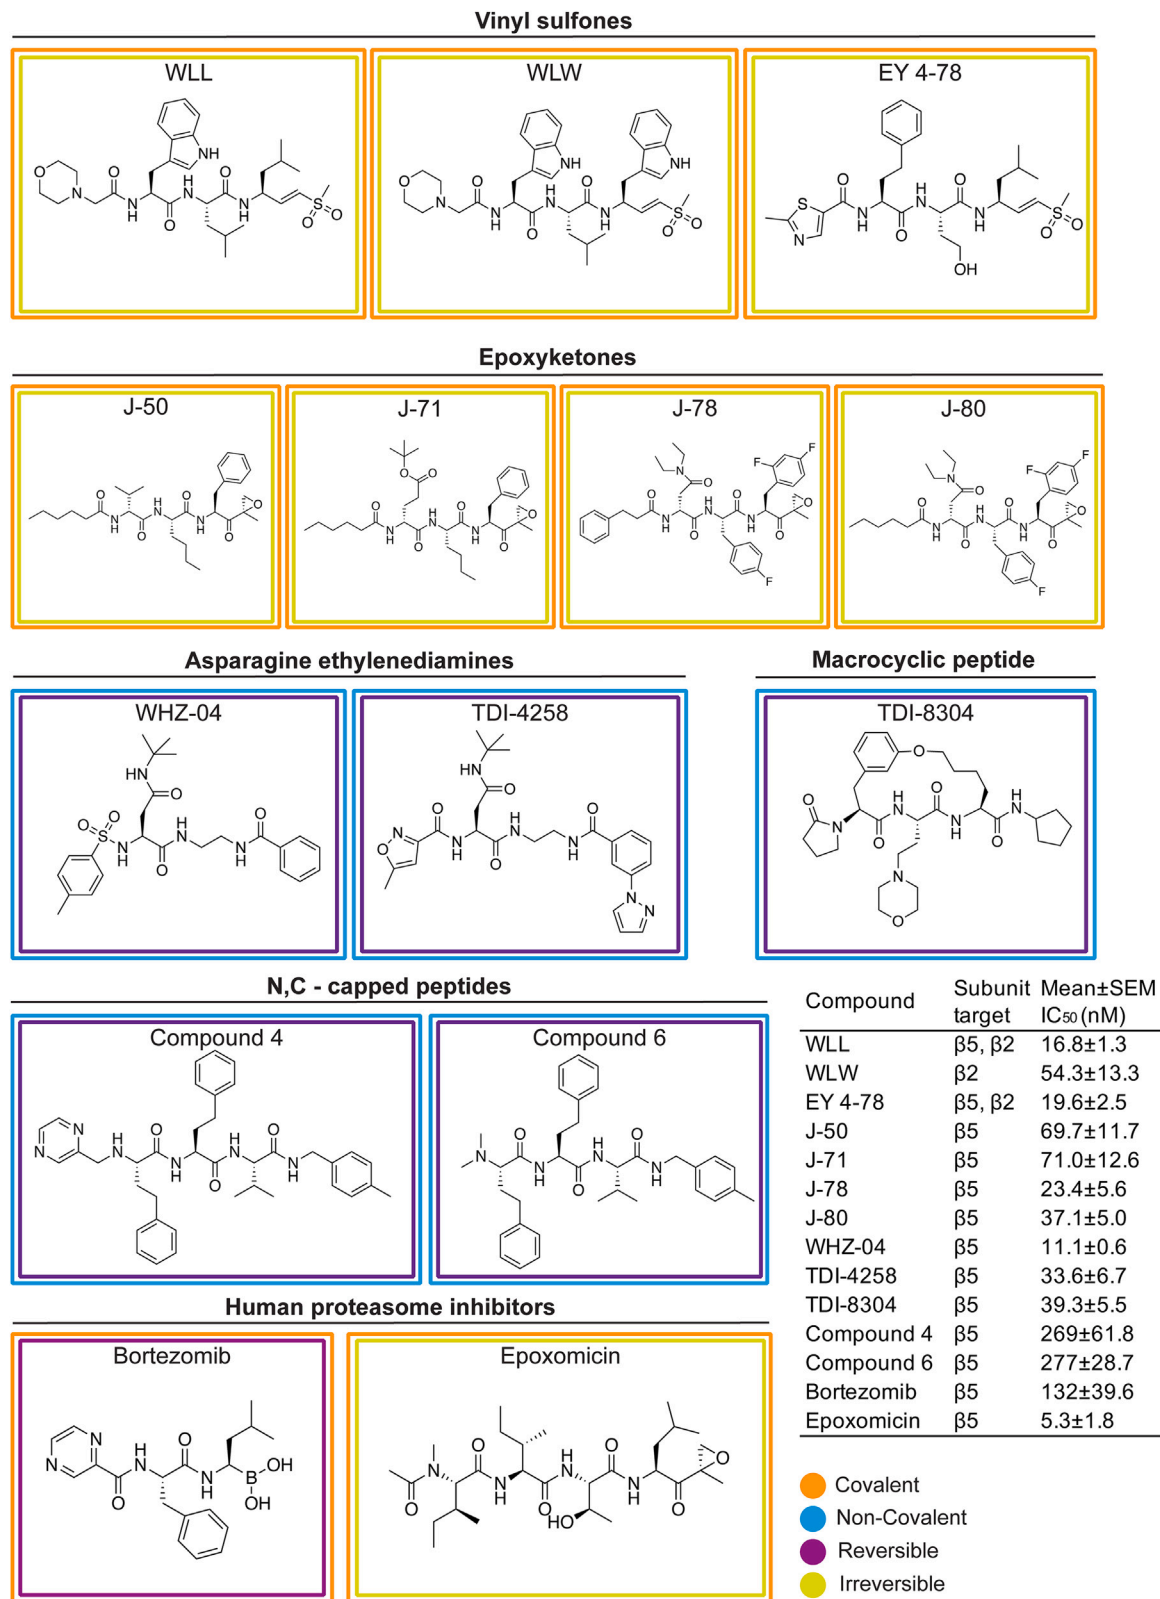

**Figure 1. Structures of proteasome inhibitors employed in this study**

Chemical structures and binding properties of *Plasmodium*-selective and non-selective proteasome inhibitors tested herein. Mean IC<sub>50</sub> ± SEM for inhibitors tested against Dd2 parasites is shown (N = 2–20, n = 2; see Table S1). Binding properties (covalent or not, reversible or not) for the *Plasmodium*-selective inhibitors

(legend continued on next page)

resistance throughout Southeast Asia, portend a potential worsening of malaria's impact across the African continent.<sup>2–6</sup> To counter drug-resistant malaria, a particularly promising approach is selectively targeting the *P. falciparum* proteasome.<sup>7</sup>

The proteasome is a multi-subunit proteolytic enzyme complex that plays an integral role in maintaining cellular homeostasis in all eukaryotic organisms, including *Plasmodium* spp. The proteasome contains a 20S core particle with catalytic activity mediated by the  $\beta$ 1,  $\beta$ 2, and  $\beta$ 5 subunits. Access to this core is predominantly regulated by the coupled 19S regulatory particle.<sup>8</sup> This protein complex controls the removal of proteins specifically tagged by polyubiquitin, including ones that are damaged or that temporally regulate diverse processes, including cell cycle progression. Recent evidence also suggests that the *P. falciparum* 20S proteasome might be secreted into extracellular vesicles that modulate the mechanical properties of native human red blood cells (RBCs) by remodeling their cytoskeletal network, thereby priming RBCs for parasite invasion.<sup>9</sup> Proteasome inhibitors block the development of multiple stages of the *Plasmodium* life cycle, including oocysts and sporozoites, and broadly interfere with progression through the liver and blood stages, including gametocytogenesis.<sup>10–13</sup> Novartis, GlaxoSmithKline, and the University of Dundee have realized the value of targeting parasite proteasomes and have developed clinical candidates that inhibit the activity of kinetoplastid proteasomes.<sup>1,14–18</sup> These compounds are being developed as therapeutics to treat human African trypanosomiasis, Chagas disease, and leishmaniasis.

Large-scale screening and structure-guided chemical optimization efforts have recently identified highly selective inhibitors of *Plasmodium* spp. proteasomes.<sup>13,19–27</sup> Further refinements to inhibitor design have been made possible by the elucidation of cryoelectron microscopy (cryo-EM) structures of the *P. falciparum* 20S proteasome.<sup>21,28</sup> These compounds fall broadly into two classes: covalent inhibitors that form irreversible or slowly reversible bonds with the catalytic threonine in the active sites of the catalytic  $\beta$  subunits, or non-covalent inhibitors that reversibly bind the proteasome to block its proteolytic activity. For covalent inhibitors, potency is based on both the initial binding interactions and the subsequent rate of chemical bond formation. Thus, inhibition is time-dependent, and extended exposure to a compound can help compensate for reduced binding affinity to mutant proteasomes. Of the reported covalent inhibitors, the irreversible vinyl sulfones were previously found to have a minimal risk of resistance *in vitro*.<sup>21,29</sup> This is a key feature of these inhibitors, given that several advanced antimalarial candidates have selected for moderate to highly resistant parasites in human clinical trials.<sup>30–32</sup> For those candidates, high-grade resistance *in vitro* was correlated with *in vivo* recrudescence, highlighting the importance of understanding resistance liabilities prior to initiating clinical development.<sup>33–35</sup>

Several *Plasmodium*-selective proteasome inhibitors have been shown to synergize with ART *in vitro*, presumably because these compounds interfere with the parasite's response to cellular damage induced by ART treatment.<sup>21,23,29,36–38</sup> ART

acts by forming reactive radical species that can alkylate a broad array of parasite biomolecules, causing proteotoxic stress among other forms of cellular damage, such as impaired redox homeostasis.<sup>39,40</sup> Importantly, mutations in the parasite protein K13 (PfKelch13), which mediate resistance to ART, do not interfere with synergy between proteasome inhibitors and ART, including *in vitro* with *P. falciparum* cultured asexual blood-stage parasites and *in vivo* in *Plasmodium berghei*-infected mice.<sup>27,29,37</sup> This synergy reinforces the appeal of developing *Plasmodium*-selective proteasome inhibitors as potential new antimalarial medicines.<sup>8,41</sup>

Here we examine a panel of inhibitors that represent the main classes of compounds that are selective for *Plasmodium* proteasomes. Our study, which includes drug susceptibility assays with mutant parasites, *in vitro* resistance selections, reverse genetics, and molecular modeling, sheds light on compound specificity and identifies classes less likely to readily succumb to resistance, with dual covalent inhibition of the  $\beta$ 2 and  $\beta$ 5 active sites appearing particularly favorable. These data will help to inform future drug development efforts targeting the *P. falciparum* proteasome.

## RESULTS

### Mutations in the *P. falciparum* 26S proteasome confer distinct patterns of resistance to different inhibitor classes

Compound screens and structure- and function-based inhibitor design have yielded compounds with diverse chemotypes that selectively inhibit the *P. falciparum* proteasome.<sup>13,21,22,42</sup> Resistance to specific chemotypes can be mediated by point mutations that reside mostly within or at the interfaces of the catalytic  $\beta$  subunits that comprise the main substrate-binding pockets of the parasite proteasome.<sup>13,25,29</sup> To determine the degree to which these mutations mediate resistance to different classes of inhibitors, we profiled chemically diverse compounds (Figure 1) against a panel of proteasome mutant and wild-type (WT) parasite lines in 72 h dose-response assays. These mutant lines harbor single-nucleotide polymorphisms (SNPs) in the  $\beta$  subunits of the Pf20S proteasome core particle or in the Pf19S proteasome regulatory particle, and were previously generated from *in vitro* resistance selection studies (Table 1). The mutant lines were selected from the Southeast Asian lines Dd2 (clone B2), Cam3.II (K13 WT or C580Y mutant), or V1/S (K13 WT or C580Y mutant). Compounds were chosen to include several different classes of proteasome inhibitors with different modes of action, which can be classified as covalent irreversible (vinyl sulfones and epoxyketones), covalent reversible (bortezomib, a boronate), or non-covalent reversible (with no reactive electrophile, represented by two asparagine ethylenediamines [AsnEDAs], the macrocyclic peptide TDI-8304, and two N,C-capped peptides). They also have different proteasome subunit selectivity patterns, with most predominantly inhibiting either  $\beta$ 5 or  $\beta$ 2, while some vinyl sulfones target both these subunits (Figure 1). From these dose-response assays, we determined the half-maximal growth inhibitory concentration (IC<sub>50</sub>) of

are described in the following citations: vinyl sulfones,<sup>21,23,43</sup> epoxyketones,<sup>44,45</sup> asparagine ethylenediamines (AsnEDAs),<sup>13,24</sup> the macrocyclic peptide TDI-8304,<sup>27</sup> and the N,C-capped peptides listed as compounds 4 and 6.<sup>20</sup> The binding properties and potent antiplasmodial activity of the human proteasome inhibitors epoxomicin and bortezomib have also been previously described.<sup>46–49</sup>

**Table 1. *Plasmodium falciparum* 26S proteasome wild-type and mutant lines assayed in this study**

| Line     | Parental line                | Proteasome complex | Proteasome subunit | Gene ID       | Mutation preprocessing | Mutation postprocessing | Selection agent | Reference                    |
|----------|------------------------------|--------------------|--------------------|---------------|------------------------|-------------------------|-----------------|------------------------------|
| β2 C31Y  | Cam3.II K13 <sup>C580Y</sup> | 20S                | β2                 | PF3D7_1328100 | C72Y                   | C31Y                    | WLW             | Stokes et al. <sup>29</sup>  |
| β2 C31F  | V1/S K13 <sup>WT</sup>       | 20S                | β2                 | PF3D7_1328100 | C72F                   | C31F                    | WLW             | Stokes et al. <sup>29</sup>  |
| β2 A49E  | V1/S K13 <sup>C580Y</sup>    | 20S                | β2                 | PF3D7_1328100 | A90E                   | A49E                    | WLW             | Stokes et al. <sup>29</sup>  |
| β5 A20S  | Cam3.II K13 <sup>C580Y</sup> | 20S                | β5                 | PF3D7_1011400 | A80S                   | A20S                    | WLL             | Stokes et al. <sup>29</sup>  |
| β5 A20V  | Dd2 (clone B2)               | 20S                | β5                 | PF3D7_1011400 | A80V                   | A20V                    | MMV 1579506     | This study                   |
| β5 M45I  | Dd2 (clone B2)               | 20S                | β5                 | PF3D7_1011400 | M105I                  | M45I                    | MPI-12          | Xie et al. <sup>25</sup>     |
| β5 M45R  | Dd2 (clone B2)               | 20S                | β5                 | PF3D7_1011400 | M105R                  | M45R                    | J-80            | This study                   |
| β5 M45V  | Dd2 (clone B2)               | 20S                | β5                 | PF3D7_1011400 | M105V                  | M45V                    | J-80            | This study                   |
| β5 A49S  | Dd2 (clone B2)               | 20S                | β5                 | PF3D7_1011400 | A109S                  | A49S                    | TDI-4258        | Zhan et al. <sup>24</sup>    |
| β5 A50V  | Dd2 (clone B2)               | 20S                | β5                 | PF3D7_1011400 | A110V                  | A50V                    | J-71            | This study                   |
| β6 A117V | V1/S K13 <sup>WT</sup>       | 20S                | β6                 | PF3D7_0518300 | A117V                  | A117V                   | WLL             | Stokes et al. <sup>29</sup>  |
| β6 A117D | Dd2 (clone B2)               | 20S                | β6                 | PF3D7_0518300 | A117D                  | A117D                   | PKS21004        | Kirkman et al. <sup>13</sup> |
| β6 N151Y | Dd2 (clone B2)               | 20S                | β6                 | PF3D7_0518300 | N151Y                  | N151Y                   | TDI-8304        | This study                   |
| β6 S157L | Dd2 (clone B2)               | 20S                | β6                 | PF3D7_0518300 | S157L                  | S157L                   | TDI-8304        | This study                   |
| β6 S208L | V1/S K13 <sup>C580Y</sup>    | 20S                | β6                 | PF3D7_0518300 | S208L                  | S208L                   | WLL             | Stokes et al. <sup>29</sup>  |
| RPN6     | Cam3.II K13 <sup>WT</sup>    | 19S                | –                  | PF3D7_1306400 | E266K                  | E266K                   | WLW             | Stokes et al. <sup>29</sup>  |
| RPT5     | Cam3.II K13 <sup>C580Y</sup> | 19S                | –                  | PF3D7_1130400 | G319S                  | G319S                   | WLW             | Stokes et al. <sup>29</sup>  |
| RPT4     | Cam3.II K13 <sup>WT</sup>    | 19S                | –                  | PF3D7_1402300 | E380*                  | E380*                   | WLW             | Stokes et al. <sup>29</sup>  |

E380\* refers to a premature stop-codon mutation.

each compound against asynchronous asexual blood-stage *P. falciparum* cultures (Figure 1, inset). Bortezomib and epoxomicin are non-selective inhibitors that also bind human proteasomes in addition to their antiplasmodial activity and were included for comparative purposes.<sup>11,13,42</sup>

Results for dose-response assays testing the activity of the selected inhibitors against our panel of proteasome WT and mutant lines are represented as a heatmap in Figure 2, which shows the log<sub>10</sub>-fold change (the ratio of the IC<sub>50</sub> of the compound tested against a mutant line divided by its IC<sub>50</sub> against the corresponding WT parental line) for each compound against each mutant line. Mean ± SEM IC<sub>50</sub> values are shown in Figure S1 as bar charts that include asterisks to indicate statistically significant changes, with numerical values and fold shifts provided in Tables S1 and S2, respectively.

We first tested the three vinyl sulfone inhibitors WLL, WLW, and EY 4-78, which are all covalent, irreversible inhibitors of the *Plasmodium* proteasome.<sup>21,23</sup> WLL and EY 4-78 inhibit both the Pf20S β5 and β2 subunits, whereas WLW primarily inhibits β2<sup>21</sup> (Figure 1). WLL and WLW exhibited relatively small shifts in their IC<sub>50</sub> values when tested against our proteasome mutant lines compared with WT parental controls (Figure 2 and Table S2). For WLL, we observed 2- to 3-fold higher IC<sub>50</sub> values against the WLL-selected β5 A20S and β6 A117V mutant lines<sup>29</sup> compared with their respective parental lines. Collateral sensitivity was also observed, most prominently in β5 A49S mutant parasites (selected with TDI-4258; Table 1) that yielded 5-fold lower IC<sub>50</sub> values relative to the corresponding WT parasites (Figure 2). Interestingly, parasites harboring an A20V mutation

at the same residue as the WLL-selected A20S mutation became more sensitive to WLL as well. The β5 A20V mutant line was selected using the boronate compound MMV1579506, a covalent reversible inhibitor from Takeda that we previously profiled for resistance (Figures S2A and S2B). These data suggest that resistance to proteasome inhibitors is highly compound-specific, and that mutations selected with one compound can lead to collateral sensitivity to other inhibitor classes.

For WLW, we observed 4- to 8-fold higher IC<sub>50</sub> values against the WLW-selected β2 mutant lines. Interestingly, WLW showed increased potency (with up to an 8-fold lower IC<sub>50</sub>) against all lines with mutations in β5, as well as against the β6 A117D mutant line, compared with their respective parental lines (Figures 2 and S1; Tables S1 and S2). Nonetheless, some cross resistance between WLL and WLW was observed, with WLW exhibiting somewhat reduced activity against the WLL-selected β6 A117V and β6 S208L mutant lines. These results imply that, in the case of vinyl sulfones, compounds within the same class can have significantly different resistance profiles depending on their subunit specificities.

Optimization of these first-generation *Plasmodium*-specific vinyl sulfones resulted in generation of a new lead molecule, EY 4-78 (previously “inhibitor 28”), with less cross-reactivity toward the human proteasome as well as improved solubility and oral bioavailability.<sup>23</sup> Like WLL, EY 4-78 also inhibits both the β2 and β5 20S subunits. We tested EY 4-78 (Figure 1) against our panel of mutant parasite lines, including WLL- and WLW-selected mutants. Despite chemical similarities between EY 4-78 and WLL, certain mutations conferred distinct patterns

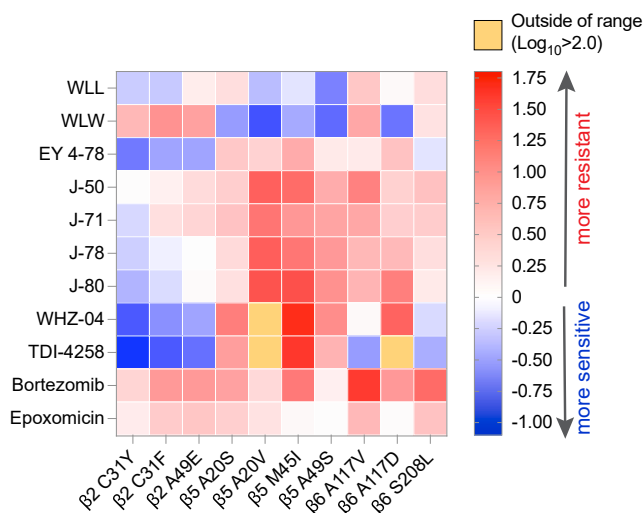

**Figure 2. Heatmap of altered susceptibility profiles of a panel of *P. falciparum* proteasome mutant lines tested against a diverse panel of proteasome inhibitors**

IC<sub>50</sub> values were obtained against each mutant line and its corresponding parental control for each of the listed compounds. Ratios of the IC<sub>50</sub> value against the mutant line divided by the IC<sub>50</sub> against the parental control line were calculated as the IC<sub>50</sub> fold change and log<sub>10</sub> transformed, and are presented as a heatmap to visualize instances of resistance or collateral sensitivity to various chemotypes for the individual mutant lines. The scale bar represents the log<sub>10</sub>-fold change. Mean ± SEM IC<sub>50</sub> values for WT and mutant lines and statistical analyses are presented in Figure S1 and Table S1. Untransformed fold changes are listed in Table S2.

of resistance to the two compounds. For example, the β5 M45I mutation, selected with MPI-12,<sup>25</sup> conferred up to a 5-fold gain of resistance to EY 4-78, but resulted in sensitization of parasites to WLL. Nonetheless, the β2 mutant lines selected with WLW were sensitized by as much as 3- to 5-fold to EY 4-78, similar to WLL (Figures 2, S1A, and S3A; Tables S1 and S2).

Carmaphycin B, a naturally derived epoxyketone inhibitor, is known to exert potent and selective activity against the *Plasmodium* proteasome.<sup>22</sup> We tested four carmaphycin B analogs, J-50, J-71, J-78, and J-80 (Figure 1), which share the same epoxyketone reactive group as the parent compound but show improved pharmacological properties.<sup>44</sup> Like the vinyl sulfones, these compounds are also covalent, irreversible peptide inhibitors. All four epoxyketones are highly specific for β5. Our proteasome mutant lines showed nearly identical resistance profiles for all four epoxyketones (Figures 2, S1C, S1D, S3B, and S3C; Tables S1 and S2). Lines harboring β5 mutations exhibited the highest levels of resistance, exceeding increases observed with the vinyl sulfones, with all four epoxyketones showing 8- to 26-fold higher IC<sub>50</sub> values against parasites expressing the β5 M45I and A20V mutations (selected with MPI-12 and MMV1579506, respectively). These data provide evidence of cross resistance between the epoxyketones and the boronate inhibitors MPI-12 and MMV1579506. The four epoxyketones showed 2- to 12-fold higher IC<sub>50</sub> values against β6 mutant lines selected using the vinyl sulfone WLL or the previously published AsnEDA inhibitor PKS21004.<sup>13</sup> In contrast, most epoxyketones showed lower IC<sub>50</sub> values against WLW-selected β2 mutant lines.

We next tested two AsnEDA compounds, WHZ-04 and TDI-4258 (Figure 1), which, unlike the epoxyketones or vinyl sulfones, bind the proteasome in a non-covalent, reversible manner.<sup>13,24,27</sup> Interestingly, the same two β5 mutations that conferred the highest degrees of resistance to the epoxyketones, namely A20V and M45I, also caused the most significant increases in WHZ-04 and TDI-4258 IC<sub>50</sub> values. In fact, these boronate-selected A20V and M45I mutations conferred greater resistance to WHZ-04 and TDI-4258 than the β6 A117D mutation that was selected with a different AsnEDA, PKS21004. Parasites harboring a separate mutation at the same residue, β6 A117V (selected with WLL), became sensitized to TDI-4258. Hypersensitivity to WHZ-04 and TDI-4258 was also observed in all WLW-selected β2 mutant lines (Figures 2, S1E, and S1F; Tables S1 and S2).

We also tested two modified peptides, compounds 4 and 6 (Figure 1), which were previously identified as high-affinity, non-covalent inhibitors of the *Plasmodium* proteasome, targeting the β5 subunit.<sup>20</sup> For these assays, we used three representative mutant lines harboring mutations in β2, β5, or β6, as restricted compound availability precluded additional testing. Both modified peptides exhibited identical resistance profiles, with the WLL-selected β5 A20S line displaying the highest levels of resistance, followed by the β6 A117V line (Figure 2). Similar to other compounds that primarily inhibit the β5 subunit (e.g., the epoxyketones and AsnEDA compounds), the WLW-selected β2 C31Y mutant line was the most susceptible to both peptide inhibitors (Figures S3D and S3E; Table S1).

Finally, we tested two commercially available agents designed to target the human proteasome, namely the boronate inhibitor bortezomib and the epoxyketone inhibitor epoxomicin (Figure 1). These inhibitors exhibited moderate or potent activity, respectively, against *P. falciparum* parasites, consistent with prior studies.<sup>12,13,42</sup> The β5 M45I mutation, selected with MPI-12 (another boronate), conferred the highest level of resistance to bortezomib (Figures 2 and S3F; Tables S1 and S2). The WLL-selected β6 A117D mutation also resulted in increased bortezomib IC<sub>50</sub> values. For epoxomicin, only the β6 S208L mutation resulted in a significant (3-fold) IC<sub>50</sub> shift relative to the corresponding WT line (Figures 2 and S3G; Tables S1 and S2). These results suggest that epoxomicin is minimally affected by mutations that confer resistance to *Plasmodium*-selective proteasome inhibitors.

Although all of the compounds tested herein inhibit the catalytic β subunits of the 20S proteasome core particle, we have previously shown that mutations in the 19S regulatory particle of the 26S *P. falciparum* proteasome can also mediate resistance to the vinyl sulfone WLW.<sup>29</sup> We tested whether three WLW-selected 19S mutants, namely RPT4 E380\* (premature stop codon), RPT5 G319S, and RPN6 E266K, could mediate cross resistance to any of the other classes of *Plasmodium* proteasome inhibitors. Consistent with our previous study,<sup>29</sup> none of the three 19S mutations resulted in significant increases in WLL IC<sub>50</sub> values, whereas all three mutations yielded 2-fold lower IC<sub>50</sub> values for the related vinyl sulfone EY 4-78 (Figures S4A–S4C; Table S3). Small (<2-fold) increases in IC<sub>50</sub> values were also observed for the epoxyketone compounds J-50, J-71, J-78, and J-80 (Figures S4D–S4G). All three 19S mutations sensitized parasites to the AsnEDA compounds WHZ-04 and TDI-4258 (Figures S4H and S4I). Conversely, these mutants tended to be

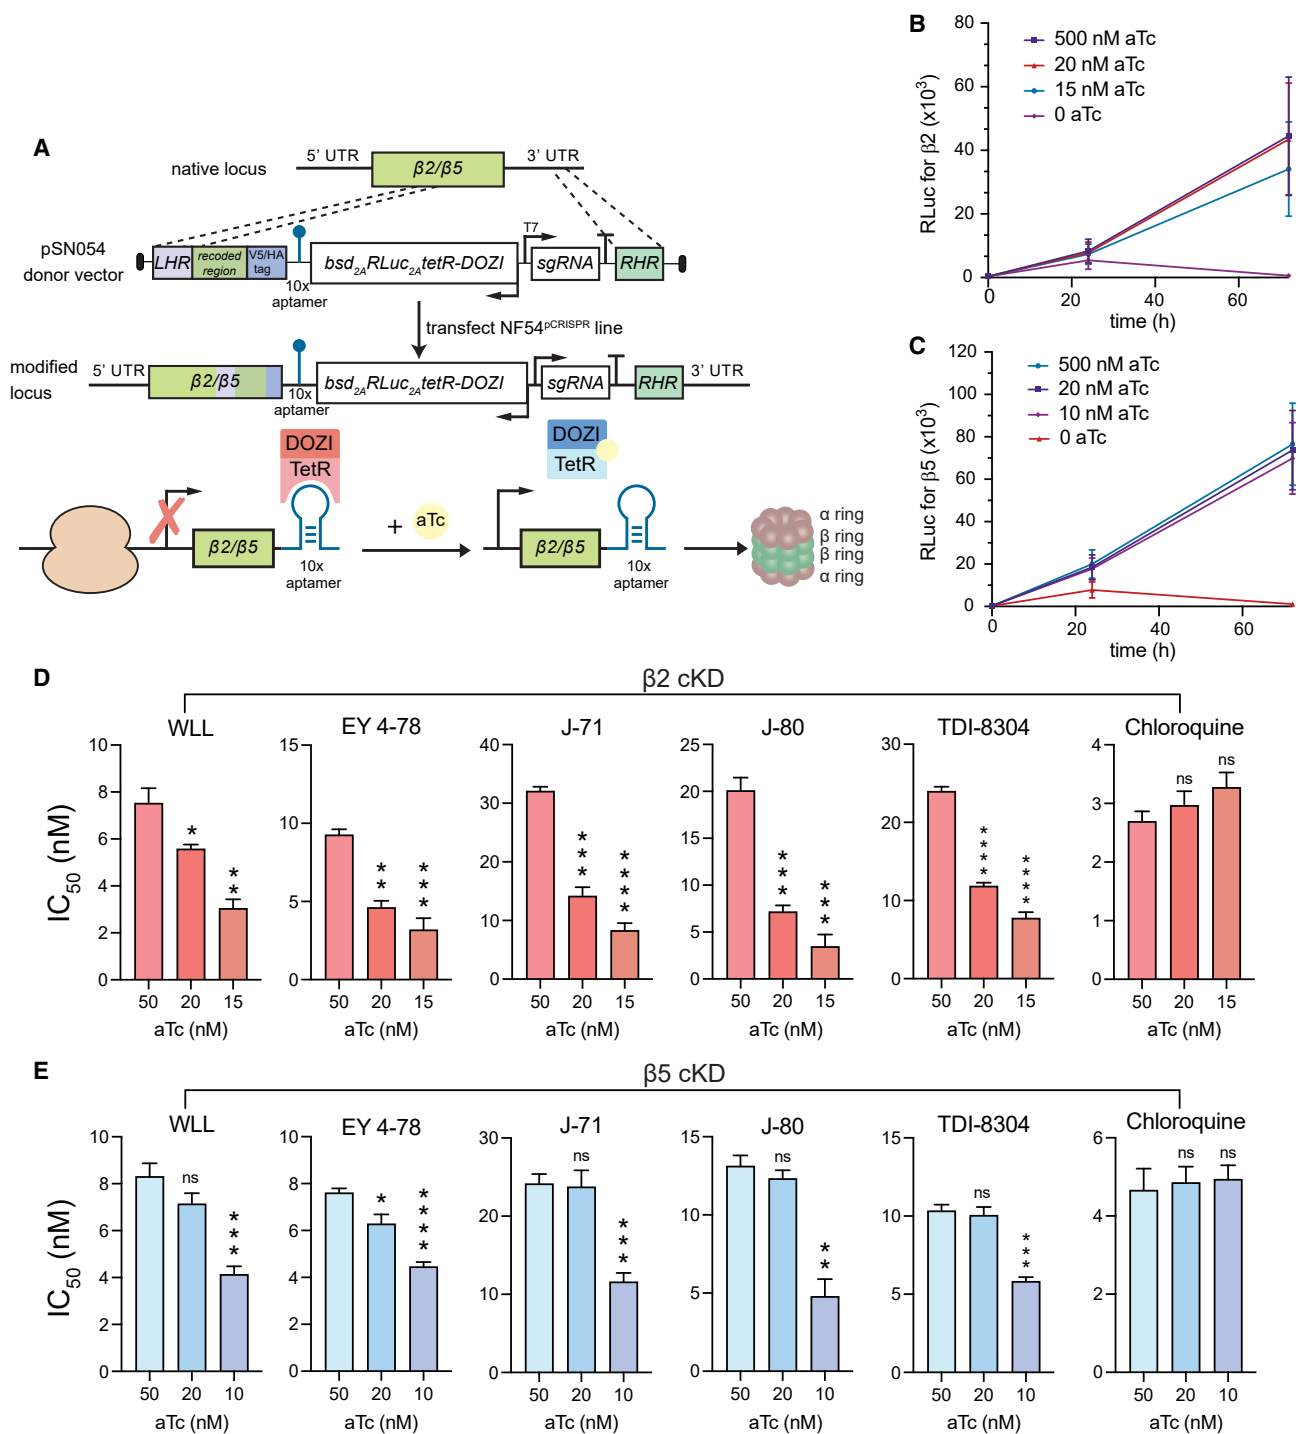

**Figure 3. Regulation of Pf20S  $\beta 2$  and  $\beta 5$  expression by conditional knockdown sensitizes parasites to proteasome inhibition**

(A) Schematic of the pSN054 plasmid used to transfect NF54<sup>pCRISPR</sup> parasites to generate conditional knockdowns (cKD) of  $\beta 2$  and  $\beta 5$ . The presence of 50 nM aTc allows for normal levels of protein translation. Removal of aTc blocks translation and reduces protein expression levels. The TetR-DOZI-T2A-RLuc-T2A-bsd cassette is expressed on the negative strand (see arrows indicating direction of transcription), with expression regulated by the *hsp86* 5' untranslated region (UTR) sequence and the *hrp2* 3' UTR sequence. For the proteasome  $\beta 2$  and  $\beta 5$  subunit genes, an *hsp86* 3' UTR terminator sequence was inserted after the aptamer array. With this strategy, the 3' end of the targets serve as the right homology arms for gene editing.

(B and C) Growth rate data for (B)  $\beta 2$  and (C)  $\beta 5$  cKD lines cultured under a range of aTc concentrations. These cKD lines express an integrated Renilla luciferase cassette, enabling growth to be measured as a function of luciferase units (RLuc). These data show loss of parasite growth upon removal of aTc, consistent with

(legend continued on next page)

less sensitive to bortezomib and epoxomicin (Figures S4J and S4K). These results suggest that conformational changes imposed by mutations in the 19S regulatory particles may in some cases modulate parasite susceptibility to  $\beta$  subunit inhibitors.

### Genetic engineering of inhibitor-selected proteasome mutations reveals that mutations are sufficient to drive resistance

To validate the role of drug-selected proteasome  $\beta$  subunit mutations in conferring resistance irrespective of the parasite background, we developed a CRISPR/Cas9 system to edit select  $\beta 5$  mutations, namely A20S (selected for resistance to WLL), A20V (MMV1579506-selected), and M45I (MPI-12-selected), into Dd2 parasites (Figure S5A). Gene-edited parasites were then tested in a new set of 72 h dose-response assays, with the original drug-selected lines harboring the same mutations and their respective parental lines included as controls. Lines were tested against WLL (a covalent, irreversible vinyl sulfone), J-80 (a covalent, irreversible epoxyketone), and TDI-8304 (a non-covalent, reversible macrocyclic peptide). The latter was recently identified as a pharmacologically superior alternative to the AsnEDA TDI-4258.<sup>27</sup> IC<sub>50</sub> values based on dose-response assays showed that the gene-edited lines phenocopied the original drug-pressured lines across each class, confirming that the  $\beta 5$  mutations tested (A20S, A20V, and M45I) were causal for resistance on different genetic backgrounds. For WLL, the  $\beta 5$  A20S edited and selected lines both yielded an  $\sim 2.5$ -fold increase in the WLL IC<sub>50</sub>, whereas no increases were observed with the MPI-12-selected M45I mutation and the MMV1579506-selected A20V mutation in either the edited or the drug-pressured lines (Figures S5B and S2D; Table S4). For J-80 and TDI-8304, all three mutations afforded moderate to high-grade resistance in both the edited and the selected lines (Figures S5C, S5D, S2E, and S2F; Table S4).

### Conditional knockdowns of the $\beta 2$ or $\beta 5$ proteasome subunits sensitize parasites to *Plasmodium*-selective proteasome inhibitors

To further validate the *Plasmodium* proteasome as the target of our different classes of inhibitors, we used CRISPR/Cas9 to engineer conditional knockdown (cKD) parasites in an NF54 Cas9-expressing parasite line (denoted NF54<sup>PCRISPR</sup>).  $\beta 5$  or  $\beta 2$  expression levels were regulated via the TetR-DOZI system (Figure 3A).<sup>50</sup> Basal expression levels were maintained by culturing parasites in the presence of 500 nM anhydrotetracycline (aTc). Medium or low expression levels were obtained for  $\beta 5$  cKD parasites by culturing in 20 or 10 nM aTc, respectively, and for  $\beta 2$  cKD parasites by culturing in 20 or 15 nM aTc, as these concentrations were found to reduce protein expression levels while retaining

sufficient parasite growth. Western blot analysis of parasites harvested after 72 h validated protein-level knockdown of both subunits in the absence of aTc (Figures S6A and S6B). We also observed a significant growth defect in parasites cultured without aTc, consistent with the essentiality of these proteasome subunits (Figures 3B and 3C).

In the  $\beta 2$  cKD line, decreased levels of  $\beta 2$  were associated with decreased IC<sub>50</sub> values for all proteasome inhibitors tested. At 15 nM aTc, we observed  $\sim 2$ - to 4-fold lower IC<sub>50</sub> values for WLL (which targets  $\beta 2$  and  $\beta 5$ ), as well as for EY 4-78, J-71, J-80, and TDI-8304 (which primarily target  $\beta 5$ ). Lower IC<sub>50</sub> values were also observed at 20 nM aTc (Figure 3D; Table S5). Control parasites cultured at 50 nM aTc, which allows for normal  $\beta 5$  expression, provided the reference values (we note that all of these compounds were more potent against NF54 parasites than the Cam3.II, Dd2, and V1/S lines tested above). Control assays with chloroquine showed no significant IC<sub>50</sub> changes at the same aTc concentrations.

In the  $\beta 5$  cKD line, we also observed  $\sim 2$ -fold lower IC<sub>50</sub> values for all inhibitors tested when cKD parasites were cultured at 10 nM aTc relative to parasites cultured at 50 nM (Figure 3E). No significant decreases were observed at 20 nM aTc. Chloroquine again showed no significant differences in IC<sub>50</sub> values across aTc concentrations. Thus, although the compounds tested all selected for mutations in  $\beta 5$  and not  $\beta 2$ , reduced expression levels of either  $\beta 2$  or  $\beta 5$  led to increased compound sensitivity, potentially because of a negative impact on proteasome complex assembly arising from lowered expression of either individual subunit.

### Irreversible *Plasmodium*-selective proteasome inhibitors display lower rates of *in vitro* resistance

Recent studies have identified resistance liabilities for several antimalarial compounds entering preclinical and human clinical trials, highlighting the need to identify compounds with low resistance risks early in the drug development process.<sup>51</sup> Here, we used *in vitro* selection experiments with one or two representative compounds from the previously profiled classes of *Plasmodium*-selective inhibitors, including WLL, TDI-8304, J-71, and J-80, to directly compare resistance risks across chemotypes. To determine the minimum inoculum of resistance (MIR), we exposed WT Dd2 (clone B2) parasites to  $3 \times \text{IC}_{50}$  concentrations of each compound throughout the selection process (single-step selection). Starting inocula were four wells at  $2.5 \times 10^6$  parasites and three wells at  $3 \times 10^7$  parasites (covering the range from  $2.5 \times 10^6$  to a total of  $1 \times 10^8$ ). Selections were maintained for 60 days or until recrudescence, and recrudescence parasites were cloned by limiting dilution (Figure 4A). For compounds that did not yield resistant parasites at these starting inocula, we performed an additional round of selections with three flasks, each with  $3 \times 10^8$  parasites

these proteasome subunits being essential for parasite growth *in vitro*. Mean  $\pm$  SD values were obtained from 3 independent experiments performed with technical duplicates.

(D and E) IC<sub>50</sub> values for (D) the transgenic  $\beta 2$  knockdown line and (E) the  $\beta 5$  knockdown line tested against representative proteasome inhibitors (WLL, EY 4-78, J-71, J-80, and TDI-8304) in decreasing concentrations of aTc. Chloroquine was used as a negative control. Results show mean IC<sub>50</sub>  $\pm$  SEM values from assays conducted on 4 to 5 independent occasions in duplicate (detailed in Table S5). Statistical significance was calculated using unpaired t tests with Welch's correction, comparing parasites cultured at the permissive concentration of aTc (50 nM) with parasites cultured under knockdown conditions (10–20 nM aTc); \*p < 0.05, \*\*p < 0.01, \*\*\*p < 0.001, \*\*\*\*p < 0.0001; ns, not significant.



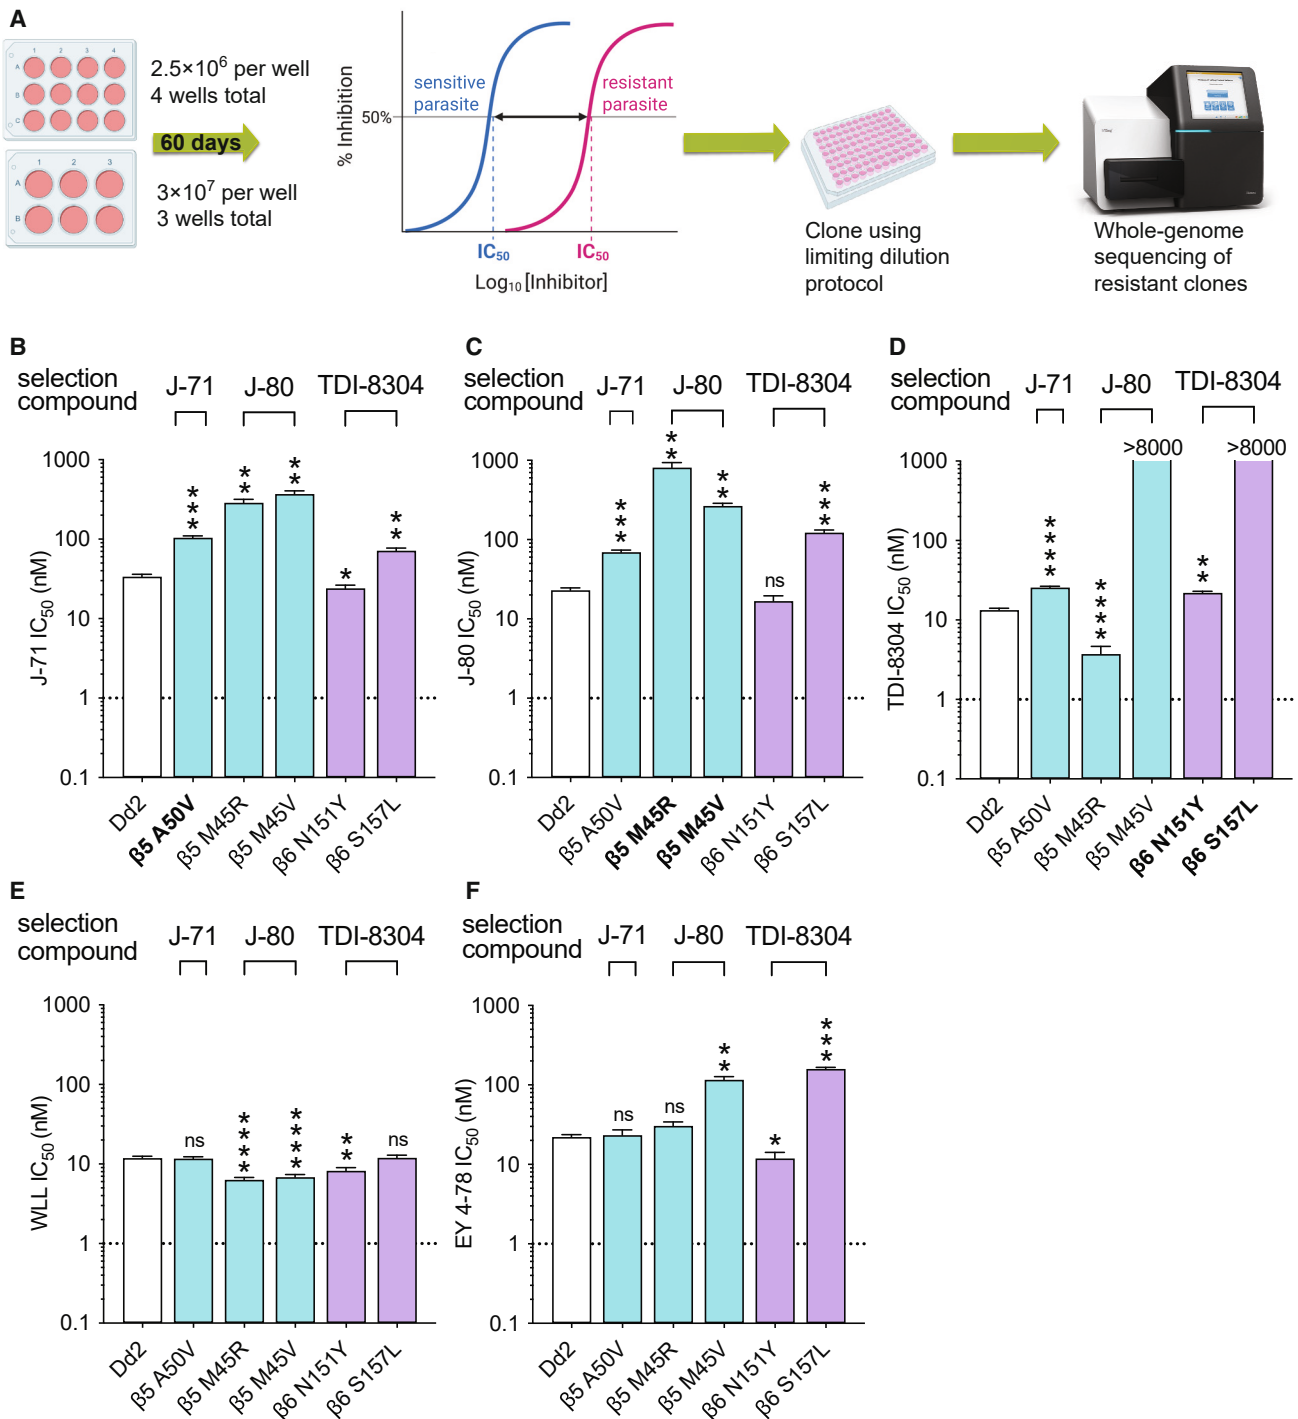

**Figure 4. Minimum inoculum of resistance (MIR) selection experiments**

(A) Outline of MIR assay used to determine the lowest parasite starting inoculum required to select for resistance to a given compound.

(B–F) IC<sub>50</sub> values for selected mutants tested against J-80, J-71, TDI-8304, WLL, and EY 4-78. Lines shown in bold were selected for resistance to the test compound. Results show mean IC<sub>50</sub> ± SEM values from assays conducted on 3 to 16 independent occasions in duplicate (detailed in Table S6). Fold changes are listed in Table S7. Statistical significance was calculated using unpaired t tests with Welch's correction, comparing selected lines to the Dd2 parent; \*p < 0.05, \*\*p < 0.01, \*\*\*p < 0.001, \*\*\*\*p < 0.0001; ns, not significant.

**Table 2. *P. falciparum* asexual blood-stage minimal inoculum for resistance (MIR) selection summary**

| Name     | Chemical class      | Starting selective pressure          | Resistant parasites in 4 wells of $2.5 \times 10^6$ | Resistant parasites in 3 wells of $3 \times 10^7$ | Resistant parasites in 3 flasks of $3 \times 10^8$ | MIR              | Selected proteasome mutation | IC <sub>50</sub> fold shift against selection compound |
|----------|---------------------|--------------------------------------|-----------------------------------------------------|---------------------------------------------------|----------------------------------------------------|------------------|------------------------------|--------------------------------------------------------|
| WLL      | vinyl sulfone       | $3 \times \text{IC}_{50}$ (50.4 nM)  | none                                                | none                                              | none                                               | $>1 \times 10^9$ | N/A                          | N/A                                                    |
| J-71     | epoxyketone         | $3 \times \text{IC}_{50}$ (152.4 nM) | none                                                | 1/3 wells                                         | N/D                                                | $1 \times 10^8$  | β5 A50V                      | 3.1 ×                                                  |
| J-80     | epoxyketone         | $3 \times \text{IC}_{50}$ (88.2 nM)  | none                                                | none                                              | 3/3 flasks                                         | $3 \times 10^8$  | β5 M45R, β5 M45V             | 35.1 ×, 11.6 ×                                         |
| TDI-8304 | macrocyclic peptide | $3 \times \text{IC}_{50}$ (33 nM)    | none                                                | 3/3 wells                                         | N/D                                                | $3 \times 10^7$  | β6 S157L, β6 N151Y           | 2,621 ×, 1.7 ×                                         |

IC<sub>50</sub> fold shifts were calculated as the ratio of the IC<sub>50</sub> of a compound against the selected mutant over its IC<sub>50</sub> against the Dd2-B2 parental line. N, n = 3–20, 2. N/D, not done; N/A, not applicable. MIRs were calculated as the total number of parasites inoculated divided by the total number of positive cultures (when obtained). The formula extends up to the largest inoculum at which parasites were obtained (or tested in the case of negative cultures), and includes lower inocula (see STAR Methods).

(Table 2). Whole-genome sequencing of resistant clones revealed a series of novel β5 and β6 mutations (Table 2).

The MIR for the epoxyketones J-71 and J-80 were  $1 \times 10^8$  and  $3 \times 10^8$  parasites, respectively (Table 2). Resistance selections with J-71 yielded clones expressing an A50V mutation in β5, which resulted in low-level resistance (3-fold increase in IC<sub>50</sub>) to this compound as well as to J-80, and a 2-fold increase in the TDI-8304 IC<sub>50</sub> (Figures 4B–4D; Table S6). For J-80, selections yielded clones with the β5 M45R or β5 M45V mutations, recalling the earlier M45I mutation observed in selections with the boronate MPI-12.<sup>25</sup> Against J-71, β5 M45R and M45V lines exhibited 9- and 11-fold increases in IC<sub>50</sub> levels, respectively (Figure 4B; Table S7). For J-80, we observed 35- and 12-fold increases in IC<sub>50</sub> values for β5 M45R and M45V, respectively, compared with the 26-fold increase observed against the M45I line (Figures 2 and S1D; Table S7). These two selected mutants showed remarkably different profiles to the reversible inhibitor TDI-8304, which displayed a 4-fold lower IC<sub>50</sub> against the β5 M45R line (indicating hypersensitization), contrasting with an estimated 660-fold increase against the β5 M45V line (Table S7).

We next performed resistance selections with the non-covalent reversible inhibitor TDI-8304. This compound yielded resistant parasites with an MIR of  $3 \times 10^7$  (Table 2). Although this compound primarily inhibits β5, TDI-8304 selected for mutations in the β6 subunit, namely N151Y and S157L, which occur in residues that occupy the β5/β6 interface. Strikingly, the β6 S157L mutant line was 2,600-fold more resistant to TDI-8304 than its WT parent, while the β6 N151Y mutant yielded only a moderate (2-fold) increase in IC<sub>50</sub> (Table S7). When tested against J-71, β6 S157L parasites were 2-fold more resistant, whereas β6 N151Y parasites were marginally more sensitive compared with the WT parental line. β6 S157L parasites were 5-fold more resistant to J-80, whereas the β6 N151Y mutation resulted in no change to the J-80 IC<sub>50</sub> (Figures 4B and 4C; Table S7).

For WLL, we were unable to generate *in vitro* resistance with a total inoculum of up to  $10^9$  parasites. This finding was consistent with our previously published results in which we obtained low-grade resistance to the vinyl sulfones WLL and WLW only with very large starting inocula of  $2 \times 10^9$  parasites.<sup>29</sup>

We then tested the J-71, J-80, and TDI-8304-selected lines against WLL and its optimized derivative EY 4-78. For WLL, all newly selected β5 or β6 mutations either resulted in no change

in IC<sub>50</sub> or yielded a 2-fold increase in susceptibility (Figure 4E; Table S7). Interestingly, when tested against EY 4-78, the β6 S157L and A117D mutations (selected with TDI-8304 and WLL, respectively) yielded modest (7- and 2-fold) increases in IC<sub>50</sub> values, respectively (Figures 4F and S3). In contrast, the β6 N151Y line was 2-fold more sensitive to EY 4-78. The β5 M45V and M45I yielded ~5-fold higher EY 4-78 IC<sub>50</sub> values, whereas no IC<sub>50</sub> change was observed with the β5 M45R mutant.

#### Molecular modeling of inhibitor-selected *Plasmodium* proteasome mutants

We next used modeling to investigate the molecular basis for the resistance of *Plasmodium* proteasome mutants to their selection compounds. The modeling focused on mutations on the β5 M45, A20, and A50 residues, which were mapped onto the *Plasmodium* 20S proteasome structure (Figure 5A). The β5 M45 and A20 side chains are solvent exposed and directly face the β5 P1 binding pocket, suggesting that mutations on these residues could result in changes to compound binding properties without any significant protein conformational changes. However, the β5 A50 side chain is buried, and any mutations on this residue are more likely to lead to local conformational rearrangements associated with changes in intramolecular interactions, affecting the adjacent β5 P1 binding pocket.

Molecular dynamics algorithms are usually used for molecular modeling studies. However, such algorithms are computationally demanding and optimized for studies of small proteins, and thus are not suitable for modeling the full 20S proteasome complex. Previous modeling of *Plasmodium* proteasome β subunit mutations could be performed only by limiting the models to the two β subunits forming the ligand binding sites.<sup>29</sup> Although informative, this required very careful supervision, as the lack of constraints imposed by the full protein-protein interactions that maintain the 20S proteasome assembly can easily lead to unrealistic model distortions. Here, we used the existing cryo-EM-derived structure of the WT *Plasmodium* 20S proteasome<sup>21,29</sup> to create structural models of mutant complexes. These models (Figures 5A and 5B) clearly show that the inhibitor-selected β5 M45I, M45R, M45V, A20S, A20V, and A50V mutations all result in spatial contraction of the β5 P1 binding pocket that compromises the binding of each of the selection compounds. Resistance to these compounds can therefore be attributed primarily to steric constraints imposed by the

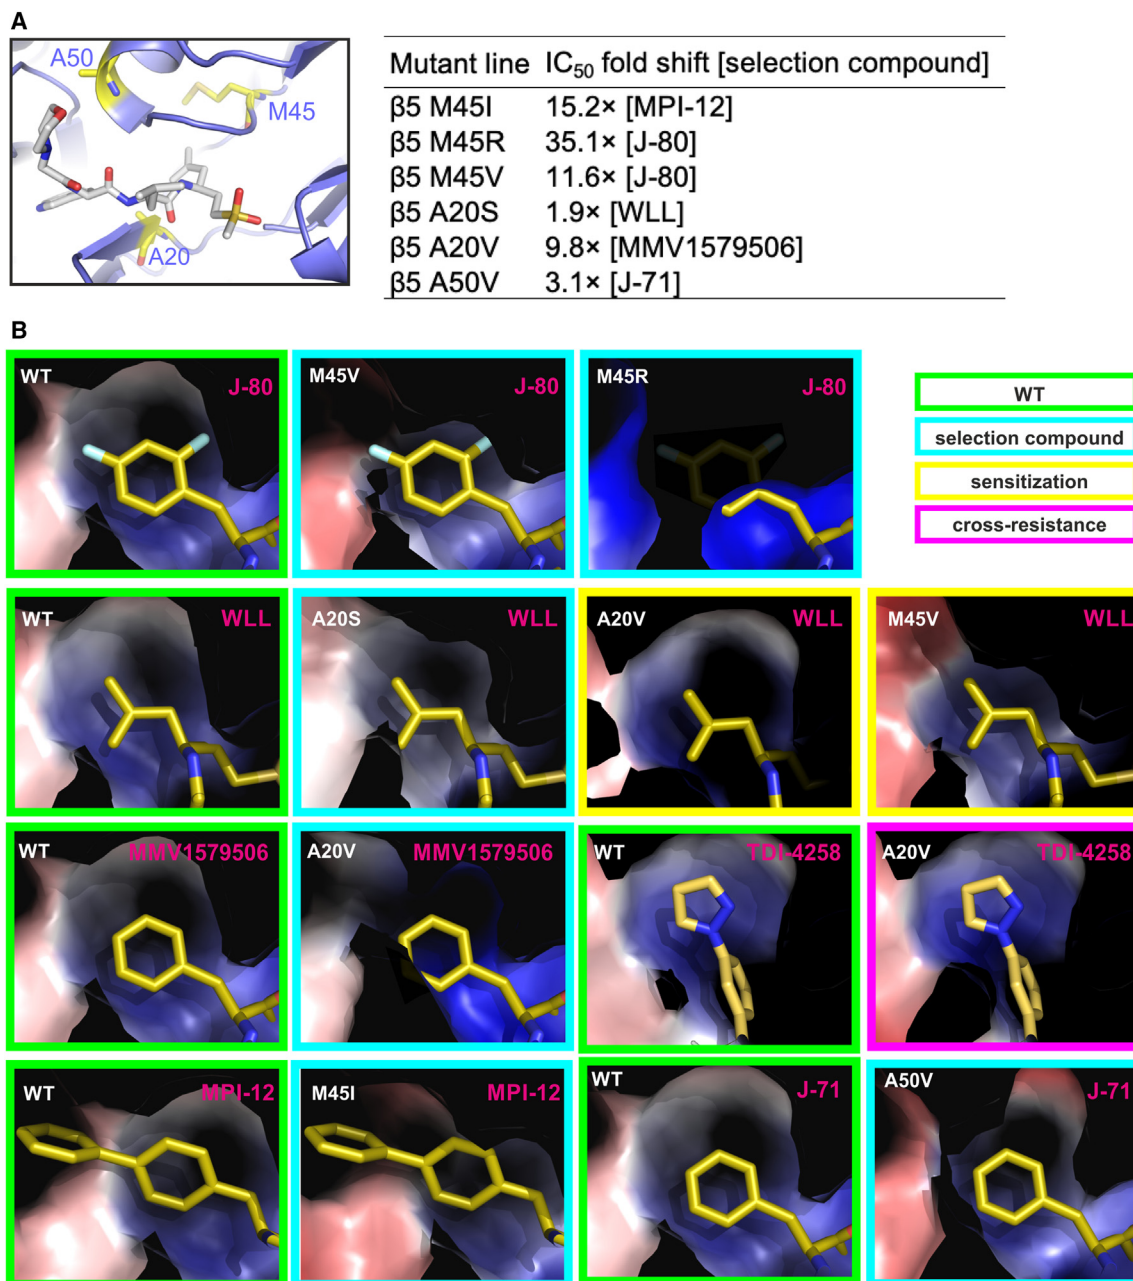

**Figure 5. Molecular modeling of compound-selected *Plasmodium* proteasome mutations**

(A) Locations of the β5 A20, M45, and A50 residues (shown as sticks with yellow backbone) in the structure of the wild-type *Plasmodium* proteasome (shown as cartoon), with fitted WLL (cartoon with gray backbone).<sup>21,29</sup> The table inset shows IC<sub>50</sub> fold shifts for inhibitors tested against proteasome mutant lines compared with the wild-type parental line. Data for the β5 M45I line were taken from Xie et al.<sup>25</sup>

(B) Effects of the M45I, M45R, M45V, A20S, A20SV, and A50V mutations on the *Plasmodium* β5 P1 binding pocket. To facilitate comparison, the β5 P1 binding pocket of the wild-type proteasome (boxed in green) is shown in the same orientation as each of the selection mutants (cyan boxes). For all mutations, the proteasome models indicate that resistance to the selection compounds is primarily mediated by steric constraints that limit their access to the P1 binding site. Examples of sensitization (yellow boxes) and cross resistance (magenta boxes) are also shown. Protein models are represented as Van der Waals surfaces colored by electrostatic potential, overlaid with inhibitors.

proteasome mutations. Steric constraints were also associated with compounds for which cross resistance was observed, while sensitization was associated with changes in the electrostatic potential of protein surfaces lining the S1 binding pocket of the mutant proteasomes (Figure 5B).

## DISCUSSION

Combating ART-resistant *P. falciparum* is a key priority of malaria control and elimination efforts. Proteasome inhibitors have multistage antiparasitic activity and display synergy with

**Table 3. Summary of resistance properties of *P. falciparum* proteasome inhibitors**

| Name       | Reference                     | Chemical class      | Covalent/non-covalent | Reversible/non-reversible | Selectivity             | Pf20S proteasome subunit target | MIR                  | Resistance-conferring mutations (reference)                                        | Maximum resistance as fold change (mutation) | Maximum cross resistance as fold change (mutation and selection compound) | Collateral sensitivity observed        |
|------------|-------------------------------|---------------------|-----------------------|---------------------------|-------------------------|---------------------------------|----------------------|------------------------------------------------------------------------------------|----------------------------------------------|---------------------------------------------------------------------------|----------------------------------------|
| WLL        | Li et al. <sup>21</sup>       | vinyl sulfone       | covalent              | irreversible              | <i>Plasmodium</i>       | β5 and β2                       | >1 × 10 <sup>9</sup> | β5 A20S; β6 A117V, S208L (Stokes et al. <sup>29</sup> )                            | 3.1 × (β6 A117V)                             | 1.1 × (β6 A117D)                                                          | yes (β2 C31Y/F; β5 A20V, A49S)         |
| WLW        | Li et al. <sup>21</sup>       | vinyl sulfone       | covalent              | irreversible              | <i>Plasmodium</i>       | β2                              | N/D                  | β2 C31F/Y, A49E; RPN6 E266K; RPT5 G319S; RPT4 E380* (Stokes et al. <sup>29</sup> ) | 8.3 × (β2 C31F)                              | 5.6 × (β6 A117V, WLL)                                                     | yes (β5 A20V, M45I, A49S; β6 A117D)    |
| EY 4-78    | Yoo et al. <sup>23</sup>      | vinyl sulfone       | covalent              | irreversible              | <i>Plasmodium</i>       | β5 and β2                       | N/D                  | –                                                                                  | –                                            | 5.2 × (β5 M45I, MPI-12)                                                   | yes (β2 C31Y/F, A49E)                  |
| J-50       | Almaliti et al. <sup>44</sup> | epoxyketone         | covalent              | irreversible              | <i>Plasmodium</i>       | β5                              | N/D                  | –                                                                                  | –                                            | 20 × (β5 A20V, MMV1579506)                                                | no                                     |
| J-71       | Almaliti et al. <sup>44</sup> | epoxyketone         | covalent              | irreversible              | <i>Plasmodium</i>       | β5                              | 1 × 10 <sup>8</sup>  | β5 A50V (this study)                                                               | 3.1 × (β5 A50V)                              | 14 × (β5 A20V, MMV1579506)                                                | yes (β2 C31Y)                          |
| J-78       | Almaliti et al. <sup>44</sup> | epoxyketone         | covalent              | irreversible              | <i>Plasmodium</i>       | β5                              | N/D                  | –                                                                                  | –                                            | 21 × (β5 A20V, MMV1579506)                                                | yes (β2 C31Y)                          |
| J-80       | Almaliti et al. <sup>44</sup> | epoxyketone         | covalent              | irreversible              | <i>Plasmodium</i>       | β5                              | 3 × 10 <sup>8</sup>  | β5 M45 V/R (this study)                                                            | 35 × (β5 M45R)                               | 26.4 × (β5 M45I, MPI-12)                                                  | yes (β2 C31Y/F)                        |
| Epoxomicin | Czesny et al. <sup>11</sup>   | epoxyketone         | covalent              | irreversible              | host, <i>Plasmodium</i> | β5                              | N/D                  | –                                                                                  | –                                            | 4.1 × (β6 A117V, WLL)                                                     | no                                     |
| PK21004    | Kirkman et al. <sup>13</sup>  | AsnEDA              | non-covalent          | reversible                | <i>Plasmodium</i>       | β5                              | N/D                  | β6 A117D (Kirkman et al. <sup>13</sup> )                                           | 130 × (β6 A117D)                             | N/D                                                                       | N/D                                    |
| WHZ-04     | Zhan et al. <sup>24</sup>     | AsnEDA              | non-covalent          | reversible                | <i>Plasmodium</i>       | β5                              | N/D                  | –                                                                                  | –                                            | 418 × (β5 A20V, MMV1579506)                                               | yes (β2 C31Y/F, A49E; β6 S208L)        |
| TDI-4258   | Zhan et al. <sup>24</sup>     | AsnEDA              | non-covalent          | reversible                | <i>Plasmodium</i>       | β5                              | N/D                  | A49S (Zhan et al. <sup>24</sup> )                                                  | N/D                                          | >300 × (β5 A20V, MMV1579506)                                              | yes (β2 C31Y/F, A49E; β6 A117V, S208L) |
| TDI-8304   | Zhan et al. <sup>27</sup>     | macrocyclic peptide | non-covalent          | reversible                | <i>Plasmodium</i>       | β5                              | 3 × 10 <sup>7</sup>  | β6 S157L, N151Y                                                                    | 2,621 × (β6 S157L)                           | 662 × (β5 M45V, J-80)                                                     | yes (β5 M45R)                          |

(Continued on next page)

Table 3. Continued

| Name       | Reference                | Chemical class     | Covalent/non-covalent | Reversible/non-reversible | Selectivity             | Pf20S proteasome subunit target | MIR | Resistance-conferring mutations (reference)      | Maximum resistance as fold change (mutation) | Maximum cross resistance as fold change (mutation and selection compound) | Collateral sensitivity observed |
|------------|--------------------------|--------------------|-----------------------|---------------------------|-------------------------|---------------------------------|-----|--------------------------------------------------|----------------------------------------------|---------------------------------------------------------------------------|---------------------------------|
| Compound 4 | Li et al. <sup>20</sup>  | N,C-capped peptide | non-covalent          | reversible                | <i>Plasmodium</i>       | $\beta 5$                       | N/D | -                                                | -                                            | 5.2x ( $\beta 5$ A20S, WLL)                                               | yes ( $\beta 2$ C31Y)           |
| Compound 6 | Li et al. <sup>20</sup>  | N,C-capped peptide | non-covalent          | reversible                | <i>Plasmodium</i>       | $\beta 5$                       | N/D | -                                                | -                                            | 4.5x ( $\beta 5$ A20S, WLL)                                               | yes ( $\beta 2$ C31Y)           |
| MMV1579506 | Takeda                   | boronate           | covalent              | reversible                | <i>Plasmodium</i>       | $\beta 5$                       | N/D | $\beta 5$ A20V (this study)                      | 9.8x ( $\beta 5$ A20V)                       | N/D                                                                       | N/D                             |
| MPI-12     | Xie et al. <sup>25</sup> | boronate           | covalent              | reversible                | <i>Plasmodium</i>       | $\beta 5$                       | N/D | $\beta 5$ M45I (Xie et al. <sup>25</sup> )       | 15x ( $\beta 5$ M45I)                        | N/D                                                                       | N/D                             |
| Bortezomib | Xie et al. <sup>42</sup> | boronate           | covalent              | reversible                | host, <i>Plasmodium</i> | $\beta 5$                       | N/D | $\beta 5$ M45I, L53F (Xie et al. <sup>42</sup> ) | 18x ( $\beta 5$ M45I)                        | 38x ( $\beta 6$ A117V, WLL)                                               | no                              |

N/D, not done.

ART, making them attractive candidates for further drug development. Here we characterized a chemically diverse panel of *Plasmodium*-selective inhibitors, focusing on their resistance properties as a means to prioritize future lead optimization efforts. For these studies, we profiled a panel of covalent and non-covalent inhibitors, including vinyl sulfones, epoxyketones, and boronates in the former category, and AsnEDAs and reversible peptide inhibitors in the latter. By testing these inhibitors against mutant proteasome lines, we identified chemotype-specific mutations whose resistance profiles varied broadly between chemical classes, including instances of collateral sensitivity (Table 3).

Overall, the smallest IC<sub>50</sub> shifts across our panel of mutant lines were observed with the vinyl sulfone inhibitors WLL, WLW, and EY 4-78 (up to 3-, 8-, and 2-fold, respectively). For these compounds, no mutations were found that caused IC<sub>50</sub> increases as high as those that earlier proved problematic (30-fold or higher) in human clinical trials with inhibitors targeting dihydroorotate dehydrogenase (DHODH) or the sodium-dependent ATPase PfATP4.<sup>30,32</sup> Unlike other classes of proteasome inhibitors, WLL and WLW exhibited compound- rather than class-specific patterns of resistance. This is most likely attributable to the fact that WLL simultaneously targets the  $\beta 2$  and  $\beta 5$  subunits of the Pf20S proteasome,<sup>21</sup> while WLW primarily targets  $\beta 2$ , and all other inhibitors tested herein primarily target  $\beta 5$ . Consistent with prior reports, hypersensitization (or collateral sensitivity) to several compounds, including the dual-subunit targeting compound WLL, was mediated by WLW-selected mutations in the 20S  $\beta 2$  subunit. These data suggest that pairing inhibitors with specificity toward different proteasome subunits could serve as an effective tool to mitigate the potential emergence of resistance.

cKD of the  $\beta 2$  and  $\beta 5$  20S subunits sensitized parasites to representative compounds from all three classes of inhibitors examined, but not the control drug chloroquine. For  $\beta 2$ , this result was likely the effect of a stoichiometric impact on proteasome assembly rather than direct targeting of this subunit by any of the compounds tested. Indeed, the effect of the  $\beta 2$  cKD was greater than that of the  $\beta 5$  knockdown, likely due to the increased sensitivity of parasites to reduced levels of  $\beta 2$  subunit expression.

MIR selections identified the vinyl sulfone WLL as a particularly refractory inhibitor, with no recrudescence observed at inocula up to 10<sup>9</sup> asexual blood-stage parasites. These data substantiate our prior observation that resistance to vinyl sulfones is relatively difficult to achieve, requiring upwards of 2 × 10<sup>9</sup> parasites.<sup>29</sup> This compares very favorably with new antimalarials recently evaluated in patient exploratory trials, whose MIR values often range from 10<sup>6</sup> to 10<sup>9</sup> parasites, with the lower values associated with increased risk of treatment failure because of readily acquired resistance.<sup>30,32,51</sup> We suspect that the low risk of resistance to WLL is associated with its binding to both the  $\beta 2$  and the  $\beta 5$  subunits.<sup>21</sup>

By comparison, selections with the epoxyketones J-71 and J-80 and the macrocyclic peptide TDI-8304 yielded MIR values ranging from 3 × 10<sup>7</sup> (for TDI-8304) to 1 × 10<sup>8</sup> and 3 × 10<sup>8</sup> for J-71 and J-80, respectively. Resistance to these compounds was mediated by mutations in the  $\beta 5$  and  $\beta 6$  subunits. Interestingly, two of these mutations (M45V and M45R) occurred at a residue earlier found to mutate to M45I in response to selection

with the potent boronate MPI-12.<sup>25</sup> Our profiling of this M45I mutant line demonstrated that it mediates moderate resistance to several epoxyketone and AsnEDA inhibitors and lower-level cross resistance to the vinyl sulfone inhibitor EY 4-78. WLL and WLW did not lose potency against this mutant line. M45, located at the  $\beta 5$  S1 binding pocket, determines the interactions with the P1 residue of substrates and inhibitors. This residue's methionine side chain is flexible and can project inward to accommodate the small, hydrophobic P1 moiety of some inhibitors, or outward for bulkier substrates. Mutation to an isoleucine or valine introduces larger, hydrophobic side chains that we predict would significantly interfere with binding of inhibitors with large P1 moieties. Modeling of compound-selected mutants of the *Plasmodium* 20S proteasome strongly supports the notion that resistance to the compounds tested results from mutation-imposed steric constraints at the  $\beta 5$  P1 binding pocket.

Our data illustrate that resistance profiles can differ even for compounds with similar binding modes, for example, vinyl sulfones and epoxyketones. Both are irreversible, covalent inhibitors, but the vinyl sulfones were markedly less prone to resistance compared to the epoxyketones. This may be due to the fact that some electrophiles are more sensitive to their positioning in the active site relative to the nucleophile, which in the case of the epoxyketones may make them more susceptible to point mutations that alter binding within the active site pockets and affect their ability to form covalent adducts. While our studies suggest that the vinyl sulfones have the most optimal properties for avoiding resistance, their resistance properties are highly compound-specific. Thus, it may be possible to tune the resistance properties of compounds in each of the different classes of inhibitors to minimize the liabilities for resistance generation.

Reversible binding inhibitors (i.e., AsnEDAs and TDI-8304) showed the highest IC<sub>50</sub> shifts (up to 20- to 30-fold) when tested against proteasome mutant lines and were the most prone to acquiring resistance *in vitro*. This is likely due to the fact that reversible binding compounds reach an equilibrium of bound and unbound states that depends on the K<sub>m</sub> values for binding. For these compounds, single point mutations can interrupt optimal binding. In the case of covalent compounds, when a similar drop in binding energy occurs, the compounds will bind less efficiently to the active site but will still eventually become covalently bound in place. Over time, covalent inhibitors can continue to block proteasome activity, making generation of resistance more difficult. Any highly significant changes to the proteasome that would effectively prevent inhibitor binding would also likely have an impact on the normal proteolytic function of the proteasome. Thus, our data provide additional support for the use of covalent inhibitors of the *Plasmodium* proteasome to suppress resistance mechanisms. We note that covalent irreversible inhibitors that are selective for parasite proteasomes have the caveat that any off-target binding to host proteasomes or other host proteases can carry an increased risk of toxicity compared with other types of inhibitors, requiring additional scrutiny during any further drug development efforts.<sup>52,53</sup>

For *P. falciparum*, we note that none of the proteasome mutations selected herein or previously obtained (Tables 2 and S2) were found recently in a sample of ~750 Ugandan isolates

with sequenced  $\beta 2$  and  $\beta 5$  genes.<sup>54</sup> That study identified a naturally occurring  $\beta 2$  S214F mutation that was associated with a 3- and 5-fold higher IC<sub>50</sub> for the peptide boronates MMV1579506 and MPI-12 (also known as MMV1794229), respectively. The vinyl sulfones WLL and WLW as well as the AsnEDA TDI-4258 and the macrocyclic peptide TDI-8304 all retained full activity against the Ugandan isolates tested.

### Limitations of the study

One limitation of our study is that we profiled only four compounds in the MIR studies, because of the quantity of work required. Additional data would make for a more comprehensive assessment. Another limitation is that our structural modeling was restricted to a subset of  $\beta 5$  mutations and compounds. Additional modeling would provide more insight into the structural basis of resistance and collateral sensitivity. We also did not biochemically profile our compounds against enriched preparations of *P. falciparum* versus human proteasomes or use activity-based probe profiling to quantify the impact of 20S subunit mutations on inhibitor binding.<sup>22,29</sup>

Other crucial factors in drug development remain to be addressed before any *Plasmodium*-selective proteasome inhibitors can advance to human clinical trials. This includes generating orally bioavailable inhibitors, which in general is challenging for any peptide-based drug. Ultimately, the ideal candidate compound will likely combine features of several of the classes of inhibitors discussed herein while maintaining their activity across multiple parasite life-cycle stages and their unique and established property of synergizing with ART.

### SIGNIFICANCE

**Malaria's impact on intertropical regions is unrelenting, with an estimated 619,000 deaths in African children below 5 years of age in 2021. Effective treatment with first-line artemisinin-based combination therapies is threatened by artemisinin-resistant parasites that are prevalent in Southeast Asia and are spreading rapidly across eastern Africa. *P. falciparum*-specific proteasome inhibitors are important assets in the pipeline for new antimalarial drugs as they display the ability to synergize with artemisinin derivatives, including against artemisinin-resistant parasites. These inhibitors bind the catalytic subunits of the proteasome, thereby preventing this multi-subunit complex from reducing artemisinin-induced proteotoxic stress by degrading damaged proteins. Here, we tested whether representatives of the leading chemical classes of *Plasmodium*-selective proteasome inhibitors differed in their propensity to select for drug-resistant parasites. These compounds differ in their chemical structures and modes of binding. We also assessed the degree to which mutations in the  $\beta 2$  or  $\beta 5$  subunit or proteasome accessory proteins mediated resistance and examined cross-resistance patterns. Our results identify the tripeptide vinyl sulfone WLL as having the most favorable profile, exhibiting a low risk of selecting for resistance and sustained potency against a panel of proteasome mutants. We attribute this feature to the covalent nature of this inhibitor and its irreversible dual binding of the  $\beta 2$  and  $\beta 5$  subunits. Conditional**

knockdown parasites confirmed compound selectivity for the 20S proteasome. We also identified proteasome mutations that resulted in collateral hypersensitivity, meaning that resistance to one inhibitor caused increased parasite susceptibility to another, creating a potential for resistance-refractory inhibitor combinations. Molecular modeling identified steric constraints in the mutated  $\beta 5$  P1 binding pockets that could reduce drug binding and account for parasite resistance. Our data provide compelling justification for further advancement of proteasome inhibitors with the goal of developing synergistic drug partners to treat artemisinin-resistant malaria.

## STAR★METHODS

Detailed methods are provided in the online version of this paper and include the following:

- KEY RESOURCES TABLE
- RESOURCE AVAILABILITY
  - Lead contact
  - Materials availability
  - Data and code availability
- EXPERIMENTAL MODEL AND SUBJECT DETAILS
- METHOD DETAILS
  - Compounds
  - Synthesis of *tert*-butyl N-[[[(5S)-5-[[[(2R)-1-acetylpyrrolidine-2-carbonyl]amino]-6-oxo-6-[[[(1R)-2-phenyl-1-[[[(1S,2S,6R,8S)-2,9,9-trimethyl-3,5-dioxo-4-boratricyclo[6.1.1.0<sub>2,6</sub>]-decan-4-yl]-ethyl]amino]hexyl]carbamate (MMV1579506)
  - <sup>1</sup>H NMR for MMV1579506
  - *In vitro* drug susceptibility assays
  - Genome editing
  - Generation of conditional knockdown parasite lines
  - Western blotting
  - Growth assays
  - Minimum inoculum of resistance studies
  - Whole-genome sequencing
  - Molecular modeling of *Plasmodium* 20S proteasome mutants
- QUANTIFICATION AND STATISTICAL ANALYSIS

## SUPPLEMENTAL INFORMATION

Supplemental information can be found online at <https://doi.org/10.1016/j.chembiol.2023.03.002>.

## ACKNOWLEDGMENTS

This work was supported in part by the NIH (R21/R33 AI125781 to M.B., D.A.F.; R01 AI109023 to D.A.F.; R01 AI143714 to G.L.; R21 AI146387, R21 AI133393, and R01 AI158612 to A.J.O.). Additional funding was provided by the Department of Defense (W81XWH2210520 to D.A.F., M.B., L.A.K., G.L., A.J.O., W.H.G., and W81XWH2210015 to C.L.N.). Financial support was also provided by the Bill & Melinda Gates Foundation (INV-037899 to J.A., A.J.O., W.H.G.; OPP1162467 to J.C.N.). C.L.N. gratefully acknowledges start-up funds and a Diversity Fund grant from the University of Nebraska Medical Center. P.C.A.d.F. and S.A. acknowledge support from the University of Glasgow. We thank Takeda and the Medicines for Malaria Venture for kindly providing MMV1579506 and allowing publication.

## AUTHOR CONTRIBUTIONS

I.D., B.H.S., K.E.W., and K.J.F. conducted *P. falciparum* IC<sub>50</sub> assays; I.D. performed resistance selections; C.F.A.P. generated conditional knockdown lines and performed growth assays and compound hypersensitivity assays with associated data analysis; S.A. and P.C.A.d.F. conducted molecular modeling studies; I.D., B.H.S., K.E.W., and D.S.B. performed gene editing; W.Z., H.Z., Y.J.L., and G.L. synthesized AsnEDA compounds; L.A.K. provided AsnEDA-resistant lines; J.A., A.J.O., and W.H.G. synthesized epoxyketones; R.M. and M.B. synthesized vinyl sulfones and compounds 4 and 6; H.P. performed whole-genome sequencing; T.Y. analyzed genome data; C.L.N., L.A.K., A.E.G., M.D., A.-C.U., P.C.A.d.F., J.C.N., W.H.G., G.L., M.B., and D.A.F. supervised group efforts and provided expertise; I.D., B.H.S., and D.A.F. wrote the manuscript, with input from all authors, who also approved the final manuscript.

## DECLARATION OF INTERESTS

The following authors declare the following financial interests: A.E.G. was a Takeda employee; M.D. was an MMV employee; and G. Lin, W. Zhan, H. Zhang and L. Kirkman are listed as inventors on patent applications for TDI-4258 and TDI-8304 filed by Cornell University's Center for Technology Licensing.

## INCLUSION AND DIVERSITY

We support inclusive, diverse, and equitable conduct of research.

Received: November 15, 2022

Revised: February 10, 2023

Accepted: March 2, 2023

Published: March 23, 2023

## REFERENCES

1. World Health Organization (2022). World Malaria Report 2021. <https://www.who.int/teams/global-malaria-programme/reports/world-malaria-report-2021>.
2. Uwimana, A., Legrand, E., Stokes, B.H., Ndikumana, J.L.M., Warsame, M., Umulisa, N., Ngamije, D., Munyaneza, T., Mazarati, J.B., Munguti, K., et al. (2020). Emergence and clonal expansion of *in vitro* artemisinin-resistant *Plasmodium falciparum* kelch13 R561H mutant parasites in Rwanda. *Nat. Med.* 26, 1602–1608.
3. Uwimana, A., Umulisa, N., Venkatesan, M., Svingel, S.S., Zhou, Z., Munyaneza, T., Habimana, R.M., Rucogoza, A., Moriarty, L.F., Sandford, R., et al. (2021). Association of *Plasmodium falciparum* kelch13 R561H genotypes with delayed parasite clearance in Rwanda: an open-label, single-arm, multicentre, therapeutic efficacy study. *Lancet Infect. Dis.* 21, 1120–1128.
4. Straimer, J., Gandhi, P., Renner, K.C., and Schmitt, E.K. (2022). High prevalence of *Plasmodium falciparum* K13 mutations in Rwanda is associated with slow parasite clearance after treatment with artemether-lumefantrine. *J. Infect. Dis.* 225, 1411–1414.
5. Asua, V., Conrad, M.D., Aydemir, O., Duvalsaint, M., Legac, J., Duarte, E., Tumwebaze, P., Chin, D.M., Cooper, R.A., Yeka, A., et al. (2021). Changing prevalence of potential mediators of aminoquinoline, antifolate, and artemisinin resistance across Uganda. *J. Infect. Dis.* 223, 985–994.
6. Balikagala, B., Fukuda, N., Ikeda, M., Katuro, O.T., Tachibana, S.I., Yamauchi, M., Opio, W., Emoto, S., Anywar, D.A., Kimura, E., et al. (2021). Evidence of artemisinin-resistant malaria in Africa. *N. Engl. J. Med.* 385, 1163–1171.
7. Ye, Y. (2006). Diverse functions with a common regulator: ubiquitin takes command of an AAA ATPase. *J. Struct. Biol.* 156, 29–40.
8. Xie, S.C., Dick, L.R., Gould, A., Brand, S., and Tilley, L. (2019). The proteasome as a target for protozoan parasites. *Expert Opin. Ther. Targets* 23, 903–914.

9. Dekel, E., Yaffe, D., Rosenhek-Goldian, I., Ben-Nissan, G., Ofir-Birin, Y., Morandi, M.I., Ziv, T., Sisquella, X., Pimentel, M.A., Nebl, T., et al. (2021). 20S proteasomes secreted by the malaria parasite promote its growth. *Nat. Commun.* *12*, 1172.
10. Gantt, S.M., Myung, J.M., Briones, M.R., Li, W.D., Corey, E.J., Omura, S., Nussenzweig, V., and Sinnis, P. (1998). Proteasome inhibitors block development of *Plasmodium* spp. *Antimicrob. Agents Chemother.* *42*, 2731–2738.
11. Czesny, B., Goshu, S., Cook, J.L., and Williamson, K.C. (2009). The proteasome inhibitor epoxomicin has potent *Plasmodium falciparum* gametocytocidal activity. *Antimicrob. Agents Chemother.* *53*, 4080–4085.
12. Tschan, S., Brouwer, A.J., Werkhoven, P.R., Jonker, A.M., Wagner, L., Knittel, S., Aminake, M.N., Pradel, G., Joanny, F., Liskamp, R.M.J., and Mordmüller, B. (2013). Broad-spectrum antimalarial activity of peptido-sulfonyl fluorides, a new class of proteasome inhibitors. *Antimicrob. Agents Chemother.* *57*, 3576–3584.
13. Kirkman, L.A., Zhan, W., Visone, J., Dziedzic, A., Singh, P.K., Fan, H., Tong, X., Bruzual, I., Hara, R., Kawasaki, M., et al. (2018). Antimalarial proteasome inhibitor reveals collateral sensitivity from intersubunit interactions and fitness cost of resistance. *Proc. Natl. Acad. Sci. USA* *115*, E6863–E6870.
14. Khare, S., Nagle, A.S., Biggart, A., Lai, Y.H., Liang, F., Davis, L.C., Barnes, S.W., Mathison, C.J.N., Myburgh, E., Gao, M.Y., et al. (2016). Proteasome inhibition for treatment of leishmaniasis, Chagas disease and sleeping sickness. *Nature* *537*, 229–233.
15. Wyllie, S., Brand, S., Thomas, M., De Rycker, M., Chung, C.W., Pena, I., Bingham, R.P., Bueren-Calabuig, J.A., Cantizani, J., Cebrian, D., et al. (2019). Preclinical candidate for the treatment of visceral leishmaniasis that acts through proteasome inhibition. *Proc. Natl. Acad. Sci. USA* *116*, 9318–9323.
16. Nagle, A., Biggart, A., Be, C., Srinivas, H., Hein, A., Caridha, D., Sciotti, R.J., Pybus, B., Kreishman-Deitrick, M., Bursulaya, B., et al. (2020). Discovery and characterization of clinical candidate LXE408 as a kinetoplastid-selective proteasome inhibitor for the treatment of Leishmaniasis. *J. Med. Chem.* *63*, 10773–10781.
17. Lima, M.L., Tulloch, L.B., Corpas-Lopez, V., Carvalho, S., Wall, R.J., Milne, R., Rico, E., Patterson, S., Gilbert, I.H., Moniz, S., et al. (2022). Identification of a proteasome-targeting arylsulfonamide with potential for the treatment of Chagas' disease. *Antimicrob. Agents Chemother.* *66*, e0153521.
18. Koester, D.C., Marx, V.M., Williams, S., Jiricek, J., Dauphinais, M., René, O., Miller, S.L., Zhang, L., Patra, D., Chen, Y.L., et al. (2022). Discovery of novel quinoline-based proteasome inhibitors for Human African Trypanosomiasis (HAT). *J. Med. Chem.* *65*, 11776–11787.
19. Pereira, A.R., Kale, A.J., Fenley, A.T., Byrum, T., Debonsi, H.M., Gilson, M.K., Valeriote, F.A., Moore, B.S., and Gerwick, W.H. (2012). The carmaphycins: new proteasome inhibitors exhibiting an alpha,beta-epoxyketone warhead from a marine cyanobacterium. *ChemBiochem* *13*, 810–817.
20. Li, H., Tsu, C., Blackburn, C., Li, G., Hales, P., Dick, L., and Bogyo, M. (2014). Identification of potent and selective non-covalent inhibitors of the *Plasmodium falciparum* proteasome. *J. Am. Chem. Soc.* *136*, 13562–13565.
21. Li, H., O'Donoghue, A.J., van der Linden, W.A., Xie, S.C., Yoo, E., Foe, I.T., Tilley, L., Craik, C.S., da Fonseca, P.C.A., and Bogyo, M. (2016). Structure- and function-based design of *Plasmodium*-selective proteasome inhibitors. *Nature* *530*, 233–236.
22. LaMonte, G.M., Almaliti, J., Bibo-Verdugo, B., Keller, L., Zou, B.Y., Yang, J., Antonova-Koch, Y., Orjuela-Sanchez, P., Boyle, C.A., Vigil, E., et al. (2017). Development of a potent inhibitor of the *Plasmodium* proteasome with reduced mammalian toxicity. *J. Med. Chem.* *60*, 6721–6732.
23. Yoo, E., Stokes, B.H., de Jong, H., Vanaerschot, M., Kumar, T., Lawrence, N., Njoroge, M., Garcia, A., Van der Westhuyzen, R., Momper, J.D., et al. (2018). Defining the determinants of specificity of *Plasmodium* proteasome inhibitors. *J. Am. Chem. Soc.* *140*, 11424–11437.
24. Zhan, W., Visone, J., Ouellette, T., Harris, J.C., Wang, R., Zhang, H., Singh, P.K., Ginn, J., Sukenick, G., Wong, T.T., et al. (2019). Improvement of asparagine ethylenediamines as anti-malarial *Plasmodium*-selective proteasome inhibitors. *J. Med. Chem.* *62*, 6137–6145.
25. Xie, S.C., Metcalfe, R.D., Mizutani, H., Puhlovich, T., Hanssen, E., Morton, C.J., Du, Y., Dogovski, C., Huang, S.C., Ciavarrì, J., et al. (2021). Design of proteasome inhibitors with oral efficacy *in vivo* against *Plasmodium falciparum* and selectivity over the human proteasome. *Proc. Natl. Acad. Sci. USA* *118*, e2107213118.
26. Mata-Cantero, L., Xie, S.C., García, M., Coyle, J., Fernandez, R., Cabrera, A.C., Gillett, D.L., Crespo, B., Gamo, F.J., Fernández, E., et al. (2021). High throughput screening to identify selective and nonpeptidomimetic proteasome inhibitors as antimalarials. *ACS Infect. Dis.* *7*, 1818–1832.
27. Zhan, W., Zhang, H., Ginn, J., Leung, A., Liu, Y.J., Michino, M., Toita, A., Okamoto, R., Wong, T.T., Imaeda, T., et al. (2021). Development of a highly selective *Plasmodium falciparum* proteasome inhibitor with antimalaria activity in humanized mice. *Angew. Chem. Int. Ed. Engl.* *60*, 9279–9283.
28. Xie, S.C., Metcalfe, R.D., Hanssen, E., Yang, T., Gillett, D.L., Leis, A.P., Morton, C.J., Kuiper, M.J., Parker, M.W., Spillman, N.J., et al. (2019). The structure of the PA28-20S proteasome complex from *Plasmodium falciparum* and implications for proteostasis. *Nat. Microbiol.* *4*, 1990–2000.
29. Stokes, B.H., Yoo, E., Murithi, J.M., Luth, M.R., Afanasyev, P., da Fonseca, P.C.A., Winzeler, E.A., Ng, C.L., Bogyo, M., and Fidock, D.A. (2019). Covalent *Plasmodium falciparum*-selective proteasome inhibitors exhibit a low propensity for generating resistance *in vitro* and synergize with multiple antimalarial agents. *PLoS Pathog.* *15*, e1007722.
30. Llanos-Cuentas, A., Casapia, M., Chuquiyaury, R., Hinojosa, J.C., Kerr, N., Rosario, M., Toovey, S., Arch, R.H., Phillips, M.A., Rozenberg, F.D., et al. (2018). Antimalarial activity of single-dose DSM265, a novel *Plasmodium* dihydroorotate dehydrogenase inhibitor, in patients with uncomplicated *Plasmodium falciparum* or *Plasmodium vivax* malaria infection: a proof-of-concept, open-label, phase 2a study. *Lancet Infect. Dis.* *18*, 874–883.
31. McCarthy, J.S., Yalkinoglu, Ö., Odedra, A., Webster, R., Oeuvray, C., Tappert, A., Bezuidenhout, D., Giddins, M.J., Dhingra, S.K., Fidock, D.A., et al. (2021). Safety, pharmacokinetics, and antimalarial activity of the novel *Plasmodium* eukaryotic translation elongation factor 2 inhibitor M5717: a first-in-human, randomised, placebo-controlled, double-blind, single ascending dose study and volunteer infection study. *Lancet Infect. Dis.* *21*, 1713–1724.
32. Schmitt, E.K., Ndayisaba, G., Yeka, A., Asante, K.P., Grobusch, M.P., Karita, E., Mugerwa, H., Asiimwe, S., Odoro, A., Fofana, B., et al. (2022). Efficacy of cipargamin (KAE609) in a randomized, phase II dose-escalation study in adults in Sub-Saharan Africa with uncomplicated *Plasmodium falciparum* malaria. *Clin. Infect. Dis.* *74*, 1831–1839.
33. White, J., Dhingra, S.K., Deng, X., El Mazouni, F., Lee, M.C.S., Afanador, G.A., Lawong, A., Tomchick, D.R., Ng, C.L., Bath, J., et al. (2019). Identification and mechanistic understanding of dihydroorotate dehydrogenase point mutations in *Plasmodium falciparum* that confer *in vitro* resistance to the clinical candidate DSM265. *ACS Infect. Dis.* *5*, 90–101.
34. Baragaña, B., Hallyburton, I., Lee, M.C.S., Norcross, N.R., Grimaldi, R., Otto, T.D., Proto, W.R., Blagborough, A.M., Meister, S., Wirjanata, G., et al. (2015). A novel multiple-stage antimalarial agent that inhibits protein synthesis. *Nature* *522*, 315–320.
35. Qiu, D., Pei, J.V., Rosling, J.E.O., Thathy, V., Li, D., Xue, Y., Tanner, J.D., Penington, J.S., Aw, Y.T.V., Aw, J.Y.H., et al. (2022). A G358S mutation in the *Plasmodium falciparum* Na(+) pump PfATP4 confers clinically-relevant resistance to cipargamin. *Nat. Commun.* *13*, 5746.
36. Dogovski, C., Xie, S.C., Burgio, G., Bridgford, J., Mok, S., McCaw, J.M., Chotivanich, K., Kenny, S., Gnädig, N., Straimer, J., et al. (2015).



- Targeting the cell stress response of *Plasmodium falciparum* to overcome artemisinin resistance. *PLoS Biol.* *13*, e1002132.
37. Simwela, N.V., Stokes, B.H., Aghabi, D., Bogyo, M., Fidock, D.A., and Waters, A.P. (2020). *Plasmodium berghei* K13 mutations mediate *in vivo* artemisinin resistance that is reversed by proteasome inhibition. *mBio* *11*. e02312-20.
  38. Rosenthal, M.R., and Ng, C.L. (2021). A proteasome mutation sensitizes *P. falciparum* Cam3.11 K13(C580Y) parasites to DHA and OZ439. *ACS Infect. Dis.* *7*, 1923–1931.
  39. Tilley, L., Straimer, J., Gnädig, N.F., Ralph, S.A., and Fidock, D.A. (2016). Artemisinin action and resistance in *Plasmodium falciparum*. *Trends Parasitol.* *32*, 682–696.
  40. Rosenthal, M.R., and Ng, C.L. (2020). *Plasmodium falciparum* artemisinin resistance: the effect of heme, protein damage, and parasite cell stress response. *ACS Infect. Dis.* *6*, 1599–1614.
  41. Krishnan, K.M., and Williamson, K.C. (2018). The proteasome as a target to combat malaria: hits and misses. *Transl. Res.* *198*, 40–47.
  42. Xie, S.C., Gillett, D.L., Spillman, N.J., Tsu, C., Luth, M.R., Otilie, S., Duffy, S., Gould, A.E., Hales, P., Seager, B.A., et al. (2018). Target validation and identification of novel boronate inhibitors of the *Plasmodium falciparum* proteasome. *J. Med. Chem.* *61*, 10053–10066.
  43. Bogyo, M., McMaster, J.S., Gaczynska, M., Tortorella, D., Goldberg, A.L., and Ploegh, H. (1997). Covalent modification of the active site threonine of proteasomal beta subunits and the *Escherichia coli* homolog HsIV by a new class of inhibitors. *Proc. Natl. Acad. Sci. USA* *94*, 6629–6634.
  44. Almaliti, J., Fajtová, P., Calla, J., LaMonte, G.M., Feng, M., Rocamora, F., Otilie, S., Glukhov, E., Boura, E., Suhandynata, R.T., et al. (2023). Development of potent and highly selective epoxyketone-based *Plasmodium* proteasome inhibitors. *Chem. Eur. J.* e202203958.
  45. Wang, Z., Dove, P., Wang, X., Shamas-Din, A., Li, Z., Nachman, A., Oh, Y.J., Hurren, R., Ruschak, A., Climie, S., et al. (2015). FV-162 is a novel, orally bioavailable, irreversible proteasome inhibitor with improved pharmacokinetics displaying preclinical efficacy with continuous daily dosing. *Cell Death Dis.* *6*, e1815.
  46. Meng, L., Mohan, R., Kwok, B.H., Elofsson, M., Sin, N., and Crews, C.M. (1999). Epoxomicin, a potent and selective proteasome inhibitor, exhibits *in vivo* antiinflammatory activity. *Proc. Natl. Acad. Sci. USA* *96*, 10403–10408.
  47. Moore, B.S., Eustáquio, A.S., and McGlinchey, R.P. (2008). Advances in and applications of proteasome inhibitors. *Curr. Opin. Chem. Biol.* *12*, 434–440.
  48. Beck, P., Dubiella, C., and Groll, M. (2012). Covalent and non-covalent reversible proteasome inhibition. *Biol. Chem.* *393*, 1101–1120.
  49. Harer, S.L., Bhatia, M.S., and Bhatia, N.M. (2012). Proteasome inhibitors mechanism; source for design of newer therapeutic agents. *J. Antibiot.* *65*, 279–288.
  50. Ganesan, S.M., Falla, A., Goldfless, S.J., Nasamu, A.S., and Niles, J.C. (2016). Synthetic RNA-protein modules integrated with native translation mechanisms to control gene expression in malaria parasites. *Nat. Commun.* *7*, 10727.
  51. Duffey, M., Blasco, B., Burrows, J.N., Wells, T.N.C., Fidock, D.A., and Leroy, D. (2021). Assessing risks of *Plasmodium falciparum* resistance to select next-generation antimalarials. *Trends Parasitol.* *37*, 709–721.
  52. Sutanto, F., Konstantinidou, M., and Dömling, A. (2020). Covalent inhibitors: a rational approach to drug discovery. *RSC Med. Chem.* *11*, 876–884.
  53. Boike, L., Henning, N.J., and Nomura, D.K. (2022). Advances in covalent drug discovery. *Nat. Rev. Drug Discov.* *21*, 881–898.
  54. Garg, S., Kreutzfeld, O., Chelebieva, S., Tumwebaze, P.K., Byaruhanga, O., Okitwi, M., Orena, S., Katairo, T., Nsoyba, S.L., Conrad, M.D., et al. (2022). Susceptibilities of Ugandan *Plasmodium falciparum* isolates to proteasome inhibitors. *Antimicrob. Agents Chemother.* *66*, e0081722.
  55. Nasamu, A.S., Falla, A., Pasaje, C.F.A., Wall, B.A., Wagner, J.C., Ganesan, S.M., Goldfless, S.J., and Niles, J.C. (2021). An integrated platform for genome engineering and gene expression perturbation in *Plasmodium falciparum*. *Sci. Rep.* *11*, 342.
  56. Murithi, J.M., Pascal, C., Bath, J., Boulenc, X., Gnädig, N.F., Pasaje, C.F.A., Rubiano, K., Yeo, T., Mok, S., Klieber, S., et al. (2021). The antimalarial MMV688533 provides potential for single-dose cures with a high barrier to *Plasmodium falciparum* parasite resistance. *Sci. Transl. Med.* *13*, eabg6013.
  57. Fidock, D.A., Nomura, T., and Wellems, T.E. (1998). Cycloguanil and its parent compound proguanil demonstrate distinct activities against *Plasmodium falciparum* malaria parasites transformed with human dihydrofolate reductase. *Mol. Pharmacol.* *54*, 1140–1147.
  58. Kanai, M., Yeo, T., Asua, V., Rosenthal, P.J., Fidock, D.A., and Mok, S. (2022). Comparative analysis of *Plasmodium falciparum* genotyping via SNP detection, microsatellite profiling, and whole-genome sequencing. *Antimicrob. Agents Chemother.* *66*, e0116321.
  59. Deitsch, K., Driskill, C., and Wellems, T. (2001). Transformation of malaria parasites by the spontaneous uptake and expression of DNA from human erythrocytes. *Nucleic Acids Res.* *29*, 850–853.
  60. Xi, R., Hadjipanayis, A.G., Luquette, L.J., Kim, T.M., Lee, E., Zhang, J., Johnson, M.D., Muzny, D.M., Wheeler, D.A., Gibbs, R.A., et al. (2011). Copy number variation detection in whole-genome sequencing data using the Bayesian information criterion. *Proc. Natl. Acad. Sci. USA* *108*, E1128–E1136.
  61. Afonine, P.V., Grosse-Kunstleve, R.W., Echols, N., Headd, J.J., Moriarty, N.W., Mustyakimov, M., Terwilliger, T.C., Urzhumtsev, A., Zwart, P.H., and Adams, P.D. (2012). Towards automated crystallographic structure refinement with phenix. *Acta Crystallogr. D Biol. Crystallogr.* *68*, 352–367.
  62. Trivella, D.B.B., Pereira, A.R., Stein, M.L., Kasai, Y., Byrum, T., Valeriotte, F.A., Tantillo, D.J., Groll, M., Gerwick, W.H., and Moore, B.S. (2014). Enzyme inhibition by hydroamination: design and mechanism of a hybrid carnaphycin-syringolin enone proteasome inhibitor. *Chem. Biol.* *21*, 782–791.
  63. Pettersen, E.F., Goddard, T.D., Huang, C.C., Couch, G.S., Greenblatt, D.M., Meng, E.C., and Ferrin, T.E. (2004). UCSF Chimera—a visualization system for exploratory research and analysis. *J. Comput. Chem.* *25*, 1605–1612.
  64. Trott, O., and Olson, A.J. (2010). AutoDock Vina: improving the speed and accuracy of docking with a new scoring function, efficient optimization, and multithreading. *J. Comput. Chem.* *31*, 455–461.
  65. Straimer, J., Gnädig, N.F., Witkowski, B., Amaratunga, C., Duru, V., Ramadani, A.P., Dacheux, M., Khim, N., Zhang, L., Lam, S., et al. (2015). K13-propeller mutations confer artemisinin resistance in *Plasmodium falciparum* clinical isolates. *Science* *347*, 428–431.

STAR★METHODS

KEY RESOURCES TABLE

| REAGENT or RESOURCE                                                                                               | SOURCE                                                                          | IDENTIFIER                    |
|-------------------------------------------------------------------------------------------------------------------|---------------------------------------------------------------------------------|-------------------------------|
| <b>Antibodies</b>                                                                                                 |                                                                                 |                               |
| Mouse monoclonal anti-HA                                                                                          | Sigma-Aldrich                                                                   | Cat. #H9658; RRID: AB_260092  |
| <b>Bacterial strains</b>                                                                                          |                                                                                 |                               |
| <i>E. coli</i> HST08 (Stellar Competent Cells)                                                                    | Takara                                                                          | Cat. #636766                  |
| <b>Biological samples</b>                                                                                         |                                                                                 |                               |
| See below (cell lines)                                                                                            | N/A                                                                             | N/A                           |
| <b>Chemicals, peptides, and recombinant proteins</b>                                                              |                                                                                 |                               |
| All tested antimalarials and their structures are available in <a href="#">Figures 1</a> and <a href="#">S2</a> . |                                                                                 |                               |
| WLL                                                                                                               | Bogyo Lab, Stanford University                                                  | N/A                           |
| WLW                                                                                                               | Bogyo Lab, Stanford University                                                  | N/A                           |
| EY 4-78                                                                                                           | Bogyo Lab, Stanford University                                                  | N/A                           |
| WHZ-04                                                                                                            | Lin Lab, Weill Cornell Medicine                                                 | N/A                           |
| TDI-4258                                                                                                          | Lin Lab, Weill Cornell Medicine                                                 | N/A                           |
| TDI-8304                                                                                                          | Lin Lab, Weill Cornell Medicine                                                 | N/A                           |
| J-50                                                                                                              | Gerwick Lab, University of California San Diego                                 | N/A                           |
| J-71                                                                                                              | Gerwick Lab, University of California San Diego                                 | N/A                           |
| J-78                                                                                                              | Gerwick Lab, University of California San Diego                                 | N/A                           |
| J-80                                                                                                              | Gerwick Lab, University of California San Diego                                 | N/A                           |
| Compound 4                                                                                                        | Bogyo Lab, Stanford University                                                  | N/A                           |
| Compound 6                                                                                                        | Bogyo Lab, Stanford University                                                  | N/A                           |
| Bortezomib                                                                                                        | Millipore Sigma                                                                 | Cat. #5043140001              |
| Epoxomicin                                                                                                        | Millipore Sigma                                                                 | Cat. #E3652-50UG              |
| Chloroquine                                                                                                       | Sigma-Aldrich                                                                   | Cat. #C6628-25G               |
| SYBR Green                                                                                                        | Thermo Scientific                                                               | Cat. #S7563                   |
| MitoTracker Deep Red                                                                                              | Thermo Scientific                                                               | Cat. #M22426                  |
| Anhydrotetracycline                                                                                               | Sigma-Aldrich                                                                   | Cat. #37919                   |
| WR99210                                                                                                           | Jacobus Pharmaceuticals                                                         | N/A                           |
| <b>Critical commercial assays</b>                                                                                 |                                                                                 |                               |
| In-Fusion HD Cloning Plus kit                                                                                     | Takara                                                                          | Cat. #638909                  |
| Renilla-Glo(R) Luciferase Assay System                                                                            | Promega                                                                         | Cat. #E2750                   |
| <b>Experimental models: Cell lines</b>                                                                            |                                                                                 |                               |
| <i>P. falciparum</i> line Dd2                                                                                     | The Malaria Research and Reference Reagent Resource Center (MR4), BEI Resources | Dd2 (clone B2)                |
| <i>P. falciparum</i> line Cam 3.II K13 <sup>WT</sup>                                                              | Fidock Lab (Straimer et al.) <sup>65</sup>                                      | Cam 3.II K13 <sup>WT</sup>    |
| <i>P. falciparum</i> line Cam 3.II K13 <sup>C580Y</sup>                                                           | Fidock Lab (Straimer et al.) <sup>65</sup>                                      | Cam 3.II K13 <sup>C580Y</sup> |
| <i>P. falciparum</i> line V1/S K13 <sup>WT</sup>                                                                  | Fidock Lab (Straimer et al.) <sup>65</sup>                                      | V1/S K13 <sup>WT</sup>        |
| <i>P. falciparum</i> line V1/S K13 <sup>C580Y</sup>                                                               | Fidock Lab (Straimer et al.) <sup>65</sup>                                      | V1/S K13 <sup>C580Y</sup>     |
| <i>P. falciparum</i> line NF54 <sup>pCRISPR</sup>                                                                 | Niles Lab (Nasamu et al.) <sup>55</sup>                                         | NF54 <sup>pCRISPR</sup>       |

(Continued on next page)

**Continued**

| REAGENT or RESOURCE                         | SOURCE                                  | IDENTIFIER                                             |
|---------------------------------------------|-----------------------------------------|--------------------------------------------------------|
| Oligonucleotides                            |                                         |                                                        |
| See <a href="#">Table S7</a>                |                                         |                                                        |
| Recombinant DNA                             |                                         |                                                        |
| pDC2-cam-coSpCas9-U6-gRNA-hdhfr             | Fidock Lab                              | pDC2-cam-coSpCas9-U6-gRNA-hdhfr                        |
| pSN054                                      | Niles Lab (Nasamu et al.) <sup>55</sup> | pSN054                                                 |
| Software and algorithms                     |                                         |                                                        |
| GraphPad Prism Version 8                    | GraphPad Software, San Diego, CA, USA   | <a href="http://www.graphpad.com">www.graphpad.com</a> |
| PyMOL Molecular Graphics System Version 2.5 | Schrödinger                             | <a href="https://pymol.org/2">https://pymol.org/2</a>  |

**RESOURCE AVAILABILITY**

**Lead contact**

Further information and requests for resources and reagents should be directed to the lead contact, David Fidock ([df2260@cumc.columbia.edu](mailto:df2260@cumc.columbia.edu)).

**Materials availability**

Please note that amounts of experimental compounds may be restricted and might require resynthesis. Chemical structures for the compounds used in these studies are shown in [Figures 1](#) and [S2A](#).

**Data and code availability**

- All datasets generated during this study are provided in separate spreadsheets as part of [Tables S1–S7](#).
- No code was generated.
- Any additional information required to reanalyze the data reported in this paper is available from the [lead contact](#) upon request.

**EXPERIMENTAL MODEL AND SUBJECT DETAILS**

Asexual blood-stage parasites were cultured at 3% hematocrit in RPMI-1640 medium supplemented with 50  $\mu$ M hypoxanthine, 2.1 g/L NaHCO<sub>3</sub>, 2 mM L-glutamine, 25 mM HEPES, 0.5% (w/v) AlbuMAXII (Invitrogen) and 10  $\mu$ g/mL gentamicin. Parasites were maintained at 37°C in modular incubator chambers supplied with a 5% CO<sub>2</sub>/5% O<sub>2</sub>/90% N<sub>2</sub> gas mixture. Resistance selection and gene editing studies were performed using the Dd2-B2 clone,<sup>56</sup> referred to herein as Dd2. De-identified human erythrocytes were sourced ethically from the Interstate Blood Bank (Memphis, TN) from anonymized blood donors, and their research use for cell culture was in accordance with terms of informed consent under a protocol approved by the Columbia University Medical Center Institutional Review Board, which designated this as not human subjects research.

**METHOD DETAILS**

**Compounds**

Vinyl sulfone inhibitors (WLL (WLL-vs), WLW (WLW-vs) and EY 4-78) and N,C-capped peptides (Compounds 4 and 6) were synthesized by the Bogyo Lab.<sup>20,21,23</sup> Asparagine ethylenediamine (AsnEDA) inhibitors (WHZ-04, TDI-4258) and the macrocyclic peptide TDI-8304 were synthesized by the Lin Lab.<sup>13,24,27</sup> Epoxyketone inhibitors (J-50, J-71, J-78 and J-80) were synthesized by the Gerwick Lab.<sup>44</sup> Synthetic methods and characterization data for all of these compounds are described in the articles cited above. Details for MMV1579506 are provided below. Bortezomib and epoxomicin were purchased from Millipore-Sigma.

**Synthesis of *tert*-butyl N-[(5S)-5-[(2R)-1-acetylpyrrolidine-2-carbonyl]amino]-6-oxo-6-[(1R)-2-phenyl-1-[(1S,2S,6R,8S)-2,9,9-trimethyl-3,5-dioxa-4-boratricyclo[6.1.1.0<sup>2,6</sup>]decan-4-yl]-ethyl]amino]hexyl]carbamate (MMV1579506)**

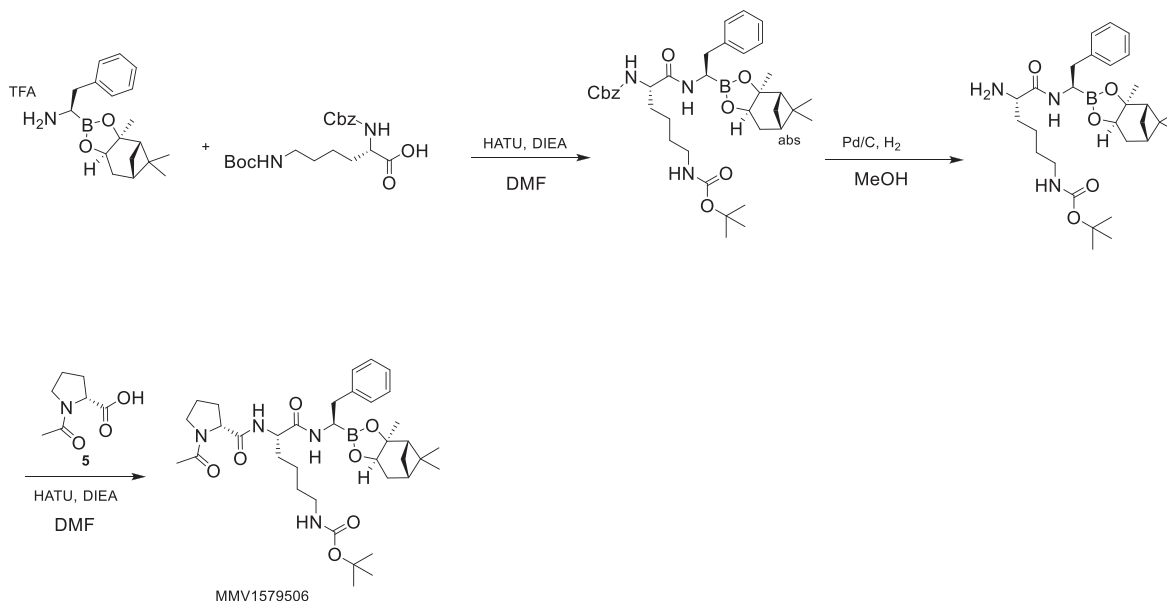

To a solution of (1R)-2-phenyl-1-[(1S,2S,6R,8S)-2,9,9-trimethyl-3,5-dioxa-4-boratricyclo-[6.1.1.0<sup>2,6</sup>]decan-4-yl]ethanamine trifluoroacetate salt (1.0 g, 2.41 mmol) in dimethyl formamide (15 mL) was added (2S)-2-[(benzyloxy)carbonyl]amino-6-[(*tert*-butoxy)carbonyl]amino]hexanoic acid (1.09 g, 2.89 mmol) and hexafluorophosphate azabenzotriazole tetramethyl uronium (HATU, 1.09 g, 2.89 mmol). Di-isopropylethylamine (0.934 g, 7.23 mmol) was added at  $-50^{\circ}\text{C}$ . The reaction mixture was stirred for 3 hr at  $20^{\circ}\text{C}$ . To the reaction mixture was added water (20 mL) at  $-50^{\circ}\text{C}$ , after which a white solid was formed. The solid was collected by filtration, then the crude product was dissolved in EtOAc (30 mL) and the organic phase was washed with brine (20 mL  $\times$  2), dried over  $\text{Na}_2\text{SO}_4$ , filtered, and concentrated under vacuum to give *tert*-butyl N-[(5S)-5-(benzyloxycarbonylamino)-6-oxo-6-[(1R)-2-phenyl-1-[(1S,2S,6R,8S)-2,9,9-trimethyl-3,5-dioxa-4-boratricyclo[6.1.1.0<sup>2,6</sup>]decan-4-yl]ethyl]-amino]hexyl]carbamate (1.5 g, 89.3% yield).  $^1\text{H}$  NMR (400 MHz,  $\text{CDCl}_3$ )  $\delta$  7.26 (m, 5 H), 7.17 (s, 2 H), 7.11 (br dd,  $J=12.1, 6.5$  Hz, 3 H), 6.23 (br s, 1 H), 5.34 (br s, 1 H), 5.00 (s, 2 H), 4.58 (br s, 1 H), 4.23 (m, 1 H), 4.06 (m, 1 H), 3.12 (br d,  $J=4.5$  Hz, 1 H), 2.99 (br s, 2 H), 2.90 (m, 1 H), 2.73 (m, 1 H), 2.25 (m, 1 H), 2.06 (m, 1 H), 1.93 (t,  $J=5.5$  Hz, 1 H), 1.77 (m, 3H), 1.57 (br s, 1 H), 1.31 (br d,  $J=12.3$  Hz, 16 H), 1.20 (m, 4 H), 0.77 (s, 3 H).

A mixture of *tert*-butyl N-[(5S)-5-(benzyloxycarbonylamino)-6-oxo-6-[(1R)-2-phenyl-1-[(1S,2S,6R,8S)-2,9,9-trimethyl-3,5-dioxa-4-boratricyclo[6.1.1.0<sup>2,6</sup>]decan-4-yl]ethyl]amino]-hexyl]carbamate (6.30 g, 9.52 mmol) and Pd/C (3.01 g) in methanol (80 mL) was placed under an atmosphere of  $\text{H}_2$  (created by vacuum evacuation and backfilling with  $\text{H}_2$  gas a total of three times). The mixture was stirred at  $25^{\circ}\text{C}$  under  $\text{H}_2$  (30 psi) for 2 hr then filtered over celite. The celite pad was rinsed well with methanol. The filtrate was then concentrated to dryness to give *tert*-butyl N-[(5S)-5-amino-6-oxo-6-[(1R)-2-phenyl-1-[(1S,2S,6R,8S)-2,9,9-trimethyl-3,5-dioxa-4-boratricyclo-[6.1.1.0<sup>2,6</sup>]decan-4-yl]ethyl]amino]hexyl]carbamate (4.70 g, 93.6% yield),  $^1\text{H}$  NMR (400 MHz,  $\text{CDCl}_3$ )  $\delta$  7.33 (m, 6 H), 4.52 (m, 1 H), 4.24 (br d,  $J=8.1$  Hz, 1 H), 3.47 (m, 1 H), 3.03 (m, 4 H), 2.70 (m, 1 H), 2.31 (m, 1 H), 2.06 (m, 2 H), 1.81 (m, 3 H), 1.38 (m, 23 H), 0.83 (m, 3 H).

To a solution of *tert*-butyl N-[(5S)-5-amino-6-oxo-6-[(1R)-2-phenyl-1-[(1S,2S,6R,8S)-2,9,9-trimethyl-3,5-dioxa-4-boratricyclo[6.1.1.0<sup>2,6</sup>]decan-4-yl]ethyl]amino]hexyl]carbamate (4.5 g, 8.53 mmol) and (2R)-1-acetylpyrrolidine-2-carboxylic acid (1.34 g, 8.53 mmol) in dichloromethane (40 mL) at  $15^{\circ}\text{C}$  was added propanephosphonic acid anhydride ( $\text{T}_3\text{P}$ , 10.8 g, 17.0 mmol) and triethylamine (5.93 mL, 42.6 mmol). The solution was stirred for 3 hr at  $15^{\circ}\text{C}$  and then water (50 mL) and dichloromethane were added. The aqueous phase was extracted with dichloromethane (50 mL  $\times$  3), then the combined organic layers were washed with brine (30 mL), dried over  $\text{Na}_2\text{SO}_4$ , filtered and concentrated. The residue was purified by column chromatography ( $\text{SiO}_2$ , elution with petroleum ether/EtOAc=3:1 to EtOH/EtOAc=10:1) to give *tert*-butyl N-[(5S)-5-[(2R)-1-acetylpyrrolidine-2-carbonyl]amino]-6-oxo-6-[(1R)-2-phenyl-1-[(1S,2S,6R,8S)-2,9,9-trimethyl-3,5-dioxa-4-boratricyclo[6.1.1.0<sup>2,6</sup>]decan-4-yl]ethyl]amino]hexyl]carbamate (3.60 g, 63.3% yield).  $[\alpha]_{\text{D}}^{22} = -38$  (c 0.1,  $\text{CHCl}_3$ ).  $^1\text{H}$  NMR (400 MHz,  $\text{CDCl}_3$ )  $\delta$  7.27 (br d,  $J=7.6$  Hz, 2 H), 7.18 (br t,  $J=7.3$  Hz, 2 H), 7.10 (m, 1 H), 4.54 (td,  $J=8.8, 4.2$  Hz, 1 H), 4.17 (br d,  $J=7.6$  Hz, 2 H), 3.48 (m, 3H), 3.18 (br t,  $J=6.5$  Hz, 1 H), 3.08 (br d,  $J=5.9$  Hz, 2 H), 2.88 (qd,  $J=13.8, 7.6$  Hz, 2 H), 2.15 (m, 4 H), 1.93 (m, 6 H), 1.82 (br s, 2 H), 1.73 (m, 2 H), 1.60 (s, 3 H), 1.42 (m, 13 H), 1.30 (s, 3 H), 1.20 (s, 3 H), 0.80 (s, 3 H). LC-MS (TFA):  $m/z = 667.5$  (M+H).

<sup>1</sup>H NMR for MMV1579506

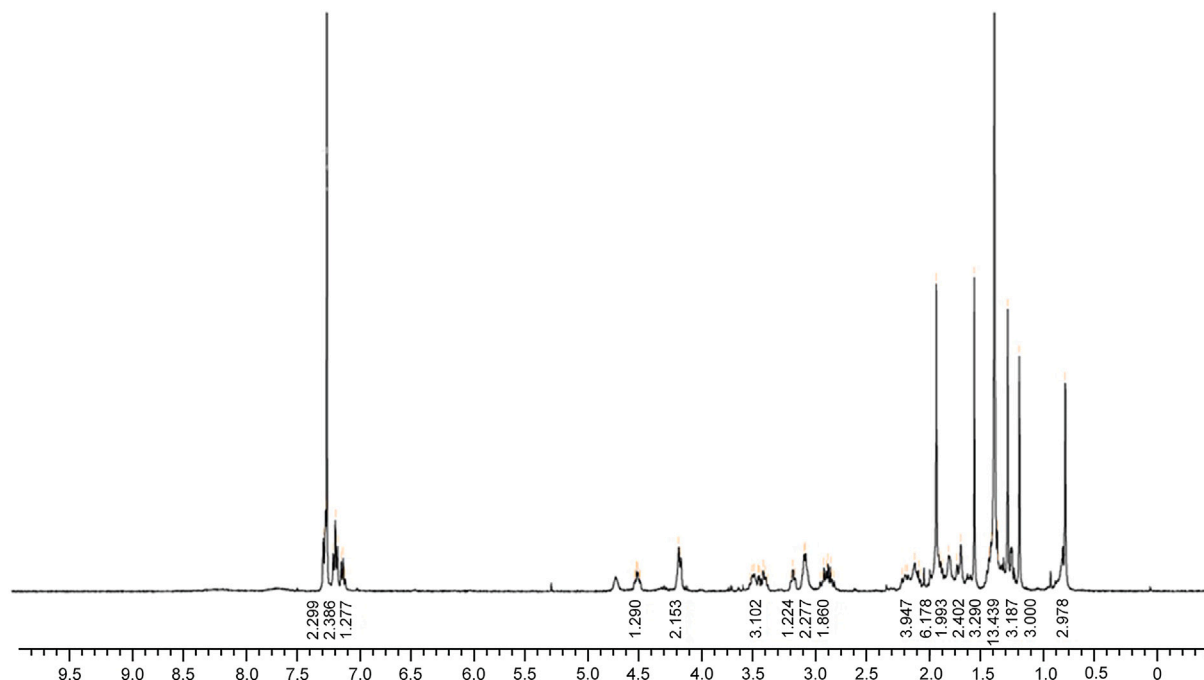

**In vitro drug susceptibility assays**

IC<sub>50</sub> values for inhibitors against proteasome WT and mutant lines were determined by exposing parasites to serial dilutions of each compound in dose-response assays using asexual blood stage parasites. Compounds were tested in duplicate in 96-well plates, with the final volume per well equal to 200 μL. Parasites were seeded at 0.2% parasitemia and 1% hematocrit. After 72 h, parasites were stained with 1 × SYBR Green and 100 nM MitoTracker Deep Red (ThermoFisher) and parasite viability was measured on an iQue Plus flow cytometer. IC<sub>50</sub> values were derived by nonlinear regression (GraphPad Prism, version 9).

**Genome editing**

The A20S, A20V and M45I mutations in the 20S proteasome β5 (PF3D7\_1011400) subunit were engineered into Dd2 parasites using a previously published “all-in-one” pDC2 CRISPR/Cas9 vector.<sup>56</sup> This vector contains expression cassettes for Cas9 (under control of the *calmodulin* promoter) and the selectable marker human dihydrofolate reductase (*dhfr*) that confers resistance to WR99210 (under the *P. chabaudi dhfr-ts* (PcDT) promoter), as well as cloning sites for the insertion of a gene-specific guide RNA (gRNA) (under the *U6* promoter) and a gene-specific donor template for homology-directed repair (Table S7). β5-specific gRNAs (gRNA1 and gRNA2) were selected using the online tool ChopChop based on their proximity to the mutations of interest (A20S/V and M45I), guanine-cytosine (GC) content, and the absence of poly-adenine/thymine (A/T) tracts (<http://chopchop.cbu.uib.no>). gRNA primers were annealed and cloned into the pDC2 CRISPR/Cas9 vector using T4 ligase (NEB) at the BbsI restriction enzyme sites (Table S8). Donor fragments expressing mutations plus silent shield mutations at the gRNA1 and gRNA2 cut sites, or silent shield mutations alone (control), were synthesized by Genewiz, then cloned into the gRNA1 or gRNA2 pDC2 CRISPR/Cas9 vector by In-Fusion cloning (Takara) at the EcoRI/AatII sites. Final plasmids were confirmed by restriction digest and sequence verified. Plasmids were prepared for transfection using the NucleoBond® Xtra midi prep kit (Macherey-Nagel).

Transfections were performed using a Bio-Rad electroporator as described previously.<sup>57</sup> Each transfection employed 50 μg of plasmid DNA and 2.5 mL of predominantly ring-stage Dd2 parasites at ≥ 5% parasitemia and 3% hematocrit. Cultures were maintained in the presence of 2.5 nM WR99210 starting on day one post electroporation. Gene editing was assessed by Sanger sequencing of the 20S β5 locus, which was PCR-amplified from blood aliquots of bulk cultures.<sup>58</sup> Edited parasite clones were obtained by limiting dilution cloning.

**Generation of conditional knockdown parasite lines**

Conditional knockdowns (cKDs) of the proteasome β2 (PF3D7\_1328100) and β5 (PF3D7\_1011400) subunits were generated by fusing the coding sequences of each gene with non-coding RNA aptamer sequences in the 3' UTR, enabling translational regulation using the TetR/DOZI system.<sup>50,55</sup> Gene editing was achieved by CRISPR/Cas9 using the linear pSN054 vector that contains cloning sites for the left homology region (LHR) and the right homology region (RHR), as well as a gene-specific gRNA (under control of the *T7*

promoter). RHRs for  $\beta 2$  and  $\beta 5$  were PCR-amplified from genomic DNA (gDNA). LHRs were synthesized using the BioXP™ 3200 System (SGI-DNA). For both  $\beta 2$  and  $\beta 5$ , the region from the guide cut site to the 3' end of the gene in the LHR was re-codonized to force integration of the RNA aptamer sequences. LHR and RHR fragments and gRNA sequences were cloned into the pSN054 linear vector by Gibson assembly (Table S7). LHRs were cloned upstream of the *blastidicin S-deaminase* selectable marker, the *Renilla luciferase* (*RLuc*) reporter, the 2A peptide-linked TetR-DOZI-RNA aptamer module, and C-terminal V5 and 2x-hemagglutinin (HA) tags. Final constructs were confirmed by restriction digest and sequence verified.

Transfections into Cas9- and T7 RNA polymerase-expressing NF54 parasites (NF54<sup>pCRISPR</sup> line)<sup>55</sup> were carried out by preloading erythrocytes with linearized vectors as previously described.<sup>59</sup> Drug selection with 2.5  $\mu\text{g}/\text{mL}$  of Blastidicin S (RPI Corp B12150-0.1) was initiated four days after transfection. Cell cultures were maintained in 500 nM anhydrotetracycline (aTc, Sigma-Aldrich). Parasite cell lines stably integrating the donor plasmids were monitored via Giemsa smears and *RLuc* measurements. Of note, 50 and 500 nM aTc were found to be equivalent in maintaining normal levels of protein expression.

### Western blotting

To measure knockdown levels in the  $\beta 2$  and  $\beta 5$  cKD lines, parasites were cultured in 500 nM or 0 nM aTc to obtain normal or knocked-down expression levels, respectively. Parasite cultures were lysed after 72 h in 0.05% saponin and pellets were resuspended in lysis buffer consisting of 4% SDS and 0.5% Triton X-114 in 1  $\times$  PBS. Proteins were separated on a Mini-PROTEAN® TGX™ Precast Gel (4-15% gradient) in Tris-Glycine buffer, transferred to a polyvinylidene fluoride (PVDF) membrane using the Mini Trans-Blot Electrophoretic Transfer Cell system according to the manufacturer's instructions, and blocked with 100 mg/mL skim milk in TBS/Tween. Membrane-bound proteins were probed with mouse anti-HA (1:3,000; Sigma H3663) or rabbit anti-GAPDH (1:5,000; Abcam AB9485) primary antibodies, followed by anti-mouse (1:5,000; Thermo Fisher Scientific 62-6520) or anti-rabbit (1:5,000; Cell signaling 7074S) horseradish peroxidase (HRP)-conjugated secondary antibodies. Following incubation in SuperSignal® West Pico Chemiluminescent substrate (Thermo Fisher Scientific PI34080), protein blots were imaged and analyzed using the ChemiDoc™ MP System and Image Lab 5.2.0 (Bio-Rad).

### Growth assays

Assessment of parasite proliferation rates in  $\beta 2$  and  $\beta 5$  cKD lines upon knockdown of protein expression in varying aTc concentrations was carried out using luminescence as a readout for growth. Synchronous ring-stage parasites cultured in 0 nM aTc or increasing aTc concentrations (15, 20 or 500 nM for  $\beta 2$ , and 10, 20 or 500 nM for  $\beta 5$ ) were set up in triplicate in 96-well plates and luminescence signals were taken at 0, 24, and 72 h post-invasion using the Renilla-Glo(R) Luciferase Assay System (Promega E2750) and the GloMax® Discover Multimode Microplate Reader (Promega). Results were visualized using GraphPad Prism.

### Minimum inoculum of resistance studies

Starting parasite inocula and MIR values for WLL, J-71, J-80 and TDI-8304 are listed in Table 2. For all compounds, resistance selections were performed by culturing Dd2 parasites continuously under  $3 \times \text{IC}_{50}$  drug pressure. Drug-containing media was replaced every day for the first 6 days, then every 2 to 4 days. Red blood cells were replenished every week. Cultures were monitored by Giemsa staining and microscopy daily until parasites were cleared, then 2 to 3 times per week to detect recrudescence. Selections were maintained for 60 days or until recrudescence parasites were observed. Resistant clones were obtained from bulk cultures by limiting dilution cloning. The MIR value is defined as the minimum number of parasites used to obtain resistance and calculated as follows: total number of parasites inoculated  $\div$  total number of positive cultures. This formula includes lower inocula where there were no positive wells and excludes higher inocula in cases where lower inocula already yielded resistance. For WLL, no positive cultures were recovered at any inoculum and the MIR was  $> ((4 \times 2.5 \times 10^6) + (3 \times 3 \times 10^7) + (3 \times 3 \times 10^8))$ , therefore  $> 1 \times 10^9$ . The other MIR values were: for J-71  $((4 \times 2.5 \times 10^6) + (3 \times 3 \times 10^7))/1 = 1 \times 10^8$ ; for J-80  $((4 \times 2.5 \times 10^6) + (3 \times 3 \times 10^7) + (3 \times 3 \times 10^8))/3 = 3.3 \times 10^8$ ; for TDI-8304  $((4 \times 2.5 \times 10^6) + (3 \times 3 \times 10^7))/3 = 3.3 \times 10^7$ .

### Whole-genome sequencing

*P. falciparum* parasites were lysed in 0.05% saponin and washed with 1  $\times$  PBS, and genomic DNA (gDNA) was purified using the QIAamp DNA Blood Midi Kit (Qiagen). gDNA concentrations were quantified by Qubit using the dsDNA HS Assay (Invitrogen). 200ng of gDNA was used to prepare sequencing libraries using the Illumina DNA Prep kit with Nextera™ DNA CD Indexes (Illumina). Samples were multiplexed and sequenced on an Illumina MiSeq using the MiSeq Reagent Kit V3 600 (Illumina) to obtain 300 base pair paired-end reads at an average of 30 $\times$  depth of coverage. Sequence reads were aligned to the *P. falciparum* 3D7 reference genome (PlasmoDB version 48) using Burrow-Wheeler Alignment. PCR duplicates and unmapped reads were filtered out using Samtools and Picard. Reads were realigned around indels using GATK RealignerTargetCreator, and base quality scores were recalibrated using GATK BaseRecalibrator. GATK HaplotypeCaller (version 4.2.2) was used to identify all single nucleotide polymorphisms (SNPs). SNPs were filtered based on quality scores (variant quality as function of depth  $\text{QD} > 1.5$ , mapping quality  $> 40$ , min base quality score  $> 18$ ) and read depth ( $> 5$ ) to obtain high-quality SNPs, which were annotated using snpEFF. Integrated Genome Viewer was used to visually verify the presence of SNPs. BIC-Seq was used to check for copy number variations using the Bayesian statistical model.<sup>60</sup> Copy number variations in highly polymorphic surface antigens and multi-gene families were removed as these are prone to stochastic changes during *in vitro* culture.

### Molecular modeling of *Plasmodium* 20S proteasome mutants

The complete molecular models of the *Plasmodium* 20S proteasome mutations A20S/V, M45I/R/V, and A50V were built based on existing cryo-EM data. The mutated residues replaced the corresponding WT residues in the previously determined cryo-EM structure (PDB 5FMG) of the Pf20S proteasome. The resulting protein coordinates were optimized by real space refinement in Phenix<sup>61</sup> using the *P. falciparum* proteasome cryo-EM map (EMD-3231<sup>21</sup>) as a template. The ligands were superimposed into the  $\beta$ 5 P1 binding pockets based on existing structural data for the binding of related compounds to proteasome complexes (PDB 5FMG<sup>21</sup>, 4HRD<sup>62</sup> and 7LXU<sup>25</sup>), without further fitting optimizations. For TDI-4258, the compound was fully built and docked into the proteasome models using AutoDockVina and UCSF Chimera.<sup>63,64</sup> Graphic representations of all resulting models were prepared using the PyMOL Molecular Graphics System (Schrödinger).

### QUANTIFICATION AND STATISTICAL ANALYSIS

Details regarding statistical tests are reported in the legends to [Figures 3, 4, and S1–S5](#), [Tables S1 and S3–S6](#). Two-tailed unpaired Student *t* tests (with Welch's correction) were employed throughout. Statistical analyses employed GraphPad Prism version 9.

**Supplemental information**

**Mitigating the risk of antimalarial  
resistance via covalent dual-subunit  
inhibition of the *Plasmodium* proteasome**

**Ioanna Deni, Barbara H. Stokes, Kurt E. Ward, Kate J. Fairhurst, Charisse Florida A. Pasaje, Tomas Yeo, Shirin Akbar, Heekuk Park, Ryan Muir, Daniella S. Bick, Wenhui Zhan, Hao Zhang, Yi Jing Liu, Caroline L. Ng, Laura A. Kirkman, Jihad Almaliti, Alexandra E. Gould, Maëlle Duffey, Anthony J. O'Donoghue, Anne-Catrin Uhlemann, Jacquie C. Niles, Paula C.A. da Fonseca, William H. Gerwick, Gang Lin, Matthew Bogyo, and David A. Fidock**



|                                                                                                                                                                                                                                                |         |
|------------------------------------------------------------------------------------------------------------------------------------------------------------------------------------------------------------------------------------------------|---------|
| <b>Figure S1</b> (related to Figures 1 and 2; Table 1; Tables S1 and S2). <b>Profiling of Pf20S <math>\beta</math>2, <math>\beta</math>5 and <math>\beta</math>6 subunit mutants against <i>Plasmodium</i>-selective proteasome inhibitors</b> | page 2  |
| <b>Figure S2</b> (related to Table 1). <b>Resistance to the boronate inhibitor MMV1579506 is mediated by the 20S <math>\beta</math>5 A20V mutation</b>                                                                                         | page 4  |
| <b>Figure S3</b> (related to Figures 1 and 2; Table 1; and Tables S1 and S2). <b>Profiling of 20S beta subunit mutants against selective and non-selective <i>Plasmodium</i> proteasome inhibitors</b>                                         | page 6  |
| <b>Figure S4</b> (related to Table 1 and Table S3). <b>Profiling of 19S regulatory particle mutants against <i>Plasmodium</i>-selective and non-selective proteasome inhibitors</b>                                                            | page 8  |
| <b>Figure S5</b> (related to Table 3). <b>CRISPR/Cas9-mediated editing of <i>P. falciparum</i> 20S <math>\beta</math>5 proteasome mutations</b>                                                                                                | page 10 |
| <b>Figure S6</b> (related to Figure 3 and Table S5). <b>Conditional knock-down parasites demonstrate essentiality for proteasome <math>\beta</math>2 and <math>\beta</math>5 subunits</b>                                                      | page 12 |
| <b>Table S1</b> (related to Figure 1; Figures S1 and S3). <b>EC<sub>50</sub> values (nM) for inhibitor-selected proteasome mutant lines and proteasome wild-type controls</b>                                                                  | page 13 |
| <b>Table S2</b> (related to Figure 2; Table S1; Figure S1 and S3). <b>EC<sub>50</sub> fold shifts (nM) for inhibitor-selected proteasome mutant lines relative to their respective parental lines</b>                                          | page 15 |
| <b>Table S3</b> (related to Table 1 and Figure S4). <b>EC<sub>50</sub> values (nM) for inhibitor-selected proteasome mutant lines and proteasome wild-type controls</b>                                                                        | page 16 |
| <b>Table S4</b> (related to Table 3 and Figure S5). <b>EC<sub>50</sub> values (nM) for CRISPR/Cas9-edited proteasome mutant lines compared with selected lines and proteasome wild-type controls</b>                                           | page 17 |
| <b>Table S5</b> (related to Figure 3). <b>EC<sub>50</sub> values (nM) for 20S proteasome <math>\beta</math>2 and <math>\beta</math>5 conditional knockdown lines</b>                                                                           | page 18 |
| <b>Table S6</b> (related to Figure 4). <b>EC<sub>50</sub> values (nM) for inhibitor-selected proteasome mutant lines and proteasome wild-type control</b>                                                                                      | page 18 |
| <b>Table S7</b> (related to Figure 4 and Table S6). <b>IC<sub>50</sub> fold shifts (nM) for selected proteasome mutant lines relative to their parental line Dd2-B2</b>                                                                        | page 19 |
| <b>Table S8</b> (related to Figure 3 and Figure S5). <b>Oligonucleotides employed in this study</b>                                                                                                                                            | page 20 |
| <b>Supplementary References</b>                                                                                                                                                                                                                | page 20 |

**Figure S1**

**Vinyl sulfones**

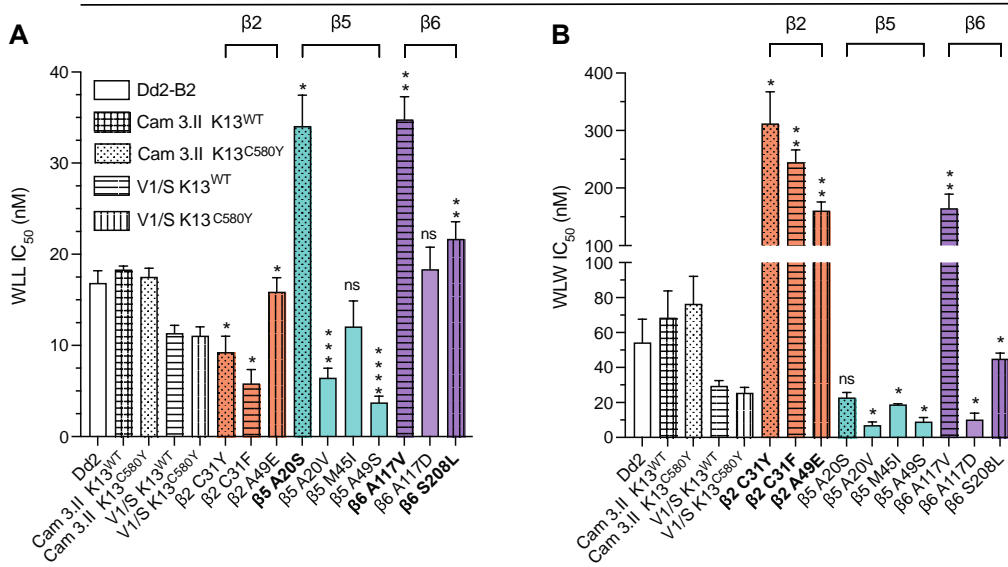

**Epoxyketones**

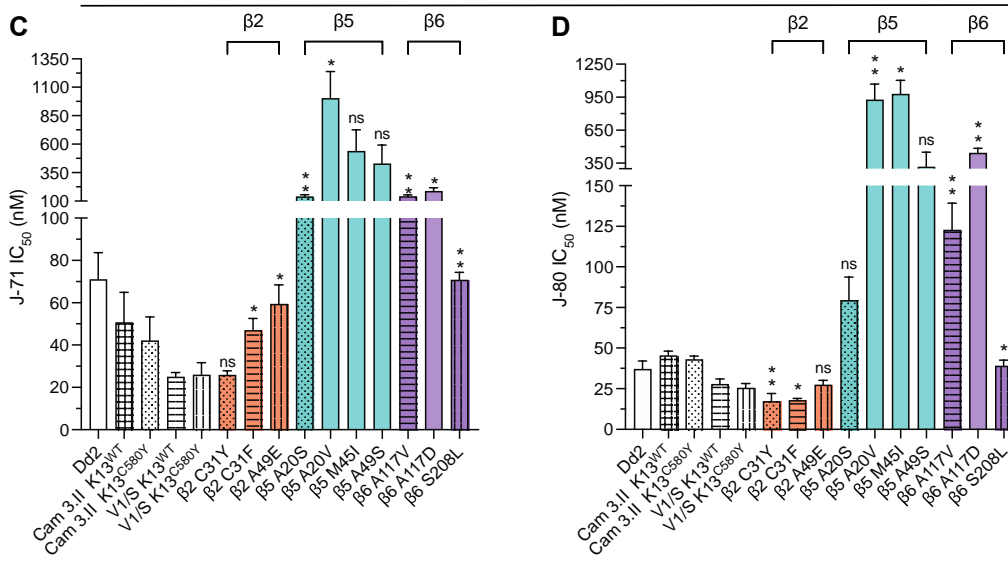

**Asparagine ethylenediamines**

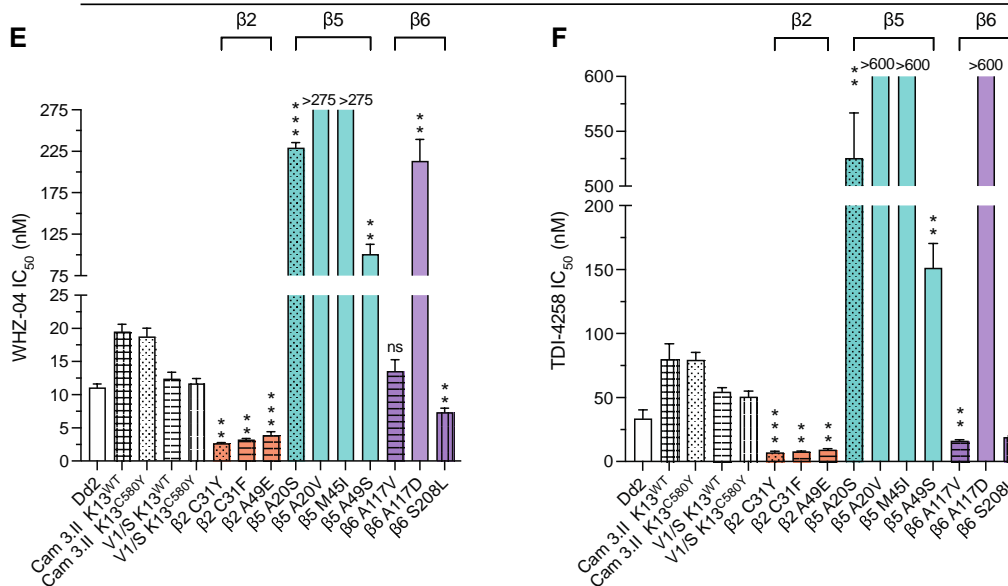

**Figure S1. Profiling of Pf20S  $\beta$ 2,  $\beta$ 5 and  $\beta$ 6 subunit mutants against *Plasmodium*-selective proteasome inhibitors. (A-F)  $IC_{50}$  values for *P. falciparum* 20S proteasome wild-type lines (Dd2, Cam3.II K13<sup>WT</sup>, Cam3.II K13<sup>C580Y</sup>, V1/S K13<sup>WT</sup> and V1/S K13<sup>C580Y</sup>) and  $\beta$  subunit mutant lines tested against a panel of *Plasmodium*-selective inhibitors in 72 h dose-response assays. Cam3.II K13<sup>WT</sup> and Cam3.II K13<sup>C580Y</sup> are isogenic and differ solely at the artemisinin resistance locus *K13*, as are V1/S K13<sup>WT</sup> and V1/S K13<sup>C580Y</sup>. For all compounds tested, the K13 C580Y mutation did not affect parasite susceptibility to proteasome inhibition. Compounds tested included: **(A, B)** vinyl sulfones (WLL and WLW), **(C, D)** epoxyketones (J-71 and J-80), and **(E, F)** asparagine ethylenediamines (WHZ-04 and TDI-4258). Lines indicated in bold were obtained from resistance selection studies with the compound being tested. Results show means  $\pm$  SEM from 3 to 4 independent assays conducted in duplicate (see **Table S1**). Statistical significance was calculated using unpaired *t* tests with Welch's correction, comparing selected lines to their respective parental lines (detailed in **Table 1** and indicated here using hatching patterns specific to each background strain). \* $p < 0.05$ ; \*\* $p < 0.01$ ; \*\*\* $p < 0.001$ ; \*\*\*\* $p < 0.0001$ ; ns, not significant.**

**Figure S2**

**A**

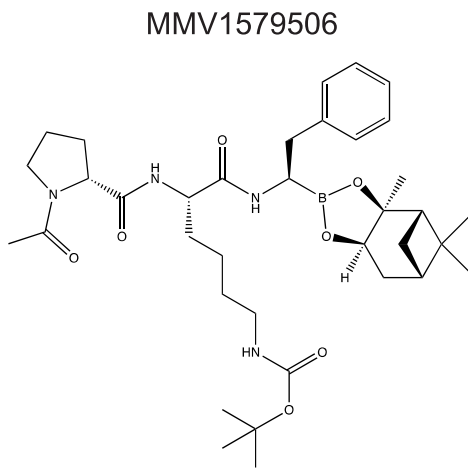

**B**

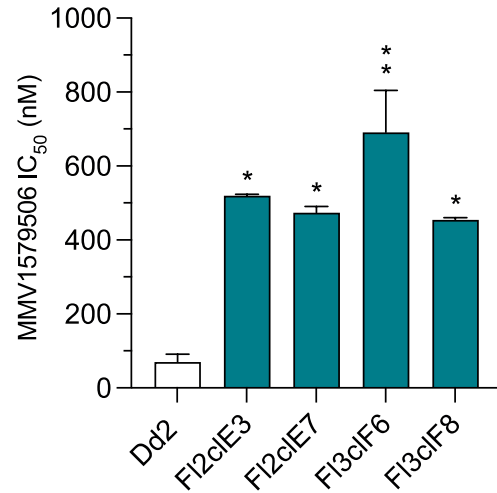

**C**

| Name       | Chemical Class | Starting Selective Pressure | Recrudescence                          | Selected Proteasome Mutation | IC <sub>50</sub> fold shift against selection compound |
|------------|----------------|-----------------------------|----------------------------------------|------------------------------|--------------------------------------------------------|
| MMV1579506 | boronate       | 3×IC <sub>50</sub> (70 nM)  | 3/3 flasks at 2×10 <sup>9</sup> /flask | A20V                         | 9.8×                                                   |

**D**

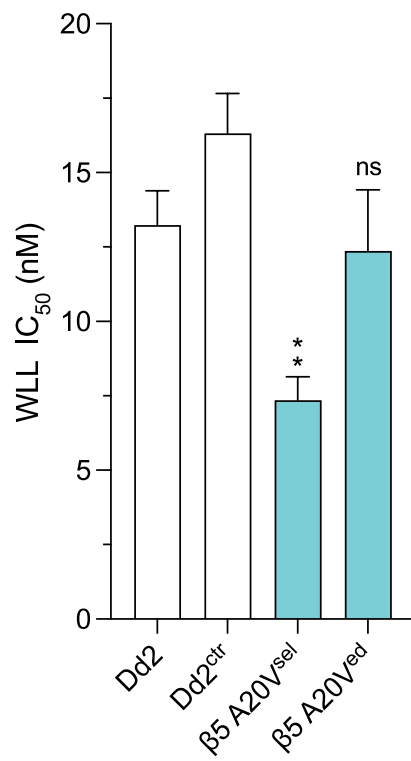

**E**

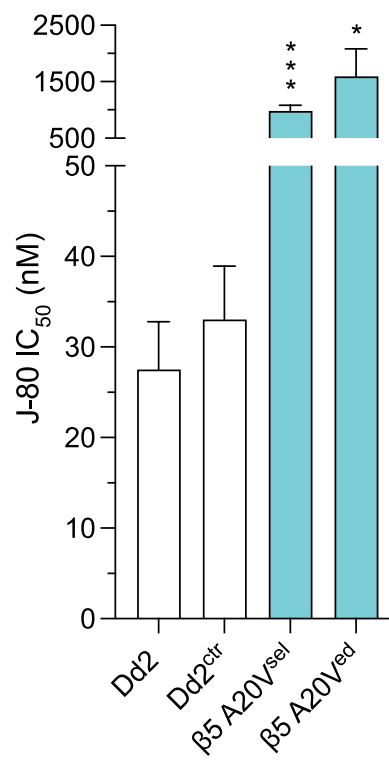

**F**

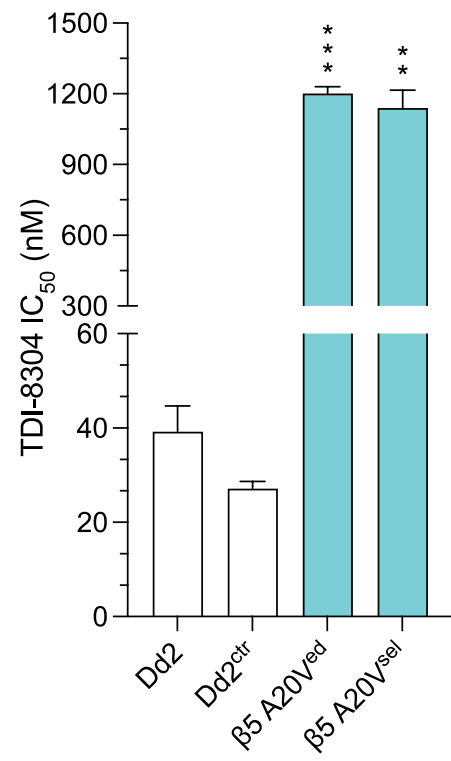

**Figure S2. Resistance to the boronate inhibitor MMV1579506 is mediated by the 20S  $\beta$ 5 A20V mutation.** (A) Chemical structure of MMV1579506, a reversible, covalent boronate inhibitor. (B)  $IC_{50}$  values for *P. falciparum* Dd2 clones generated from MMV1579506 *in vitro* resistance selections tested against the selection compound. Whole-genome sequencing of MMV1579506-selected clones (from two separate flasks, FI2 and FI3, each inoculated with  $2 \times 10^9$  parasites) revealed a  $\beta$ 5 A20V mutation in all four clones. This mutation was also present in all three bulk cultures from the recrudescence flasks. Selected lines harboring the A20V mutation exhibited up to 9.8-fold increases in their  $IC_{50}$  values relative to the wild-type Dd2 parental line. (C) Summary of MMV1579506 selections that yielded resistant parasites. All three flasks inoculated at  $2 \times 10^9$  parasites were positive. Separately, all 4 wells inoculated with  $2.5 \times 10^6$  parasites per well and all 3 wells inoculated at  $2 \times 10^7$  parasites/well remained negative (not shown). (D-F)  $IC_{50}$  values for Dd2 and drug-selected or CRISPR/Cas9 gene-edited  $\beta$ 5 A20V lines ( $\beta$ 5 A20V<sup>sel</sup> and  $\beta$ 5 A20V<sup>ed</sup>, respectively) tested against (D) WLL, (E) J-80, or (F) TDI-8304 in 72 h dose-response assays. The Dd2 control (ctr) line expresses silent binding-site mutations at the CRISPR/Cas9 cut site. Results show means  $\pm$  SEM from assays conducted on 3 to 5 independent occasions in duplicate (see **Table S2**). Statistical significance was calculated using unpaired *t* tests with Welch's correction, comparing selected or edited lines to the Dd2 parent. \* $p < 0.05$ ; \*\* $p < 0.01$ ; \*\*\* $p < 0.001$ ; \*\*\*\* $p < 0.0001$ ; ns, not significant.

**Figure S3**

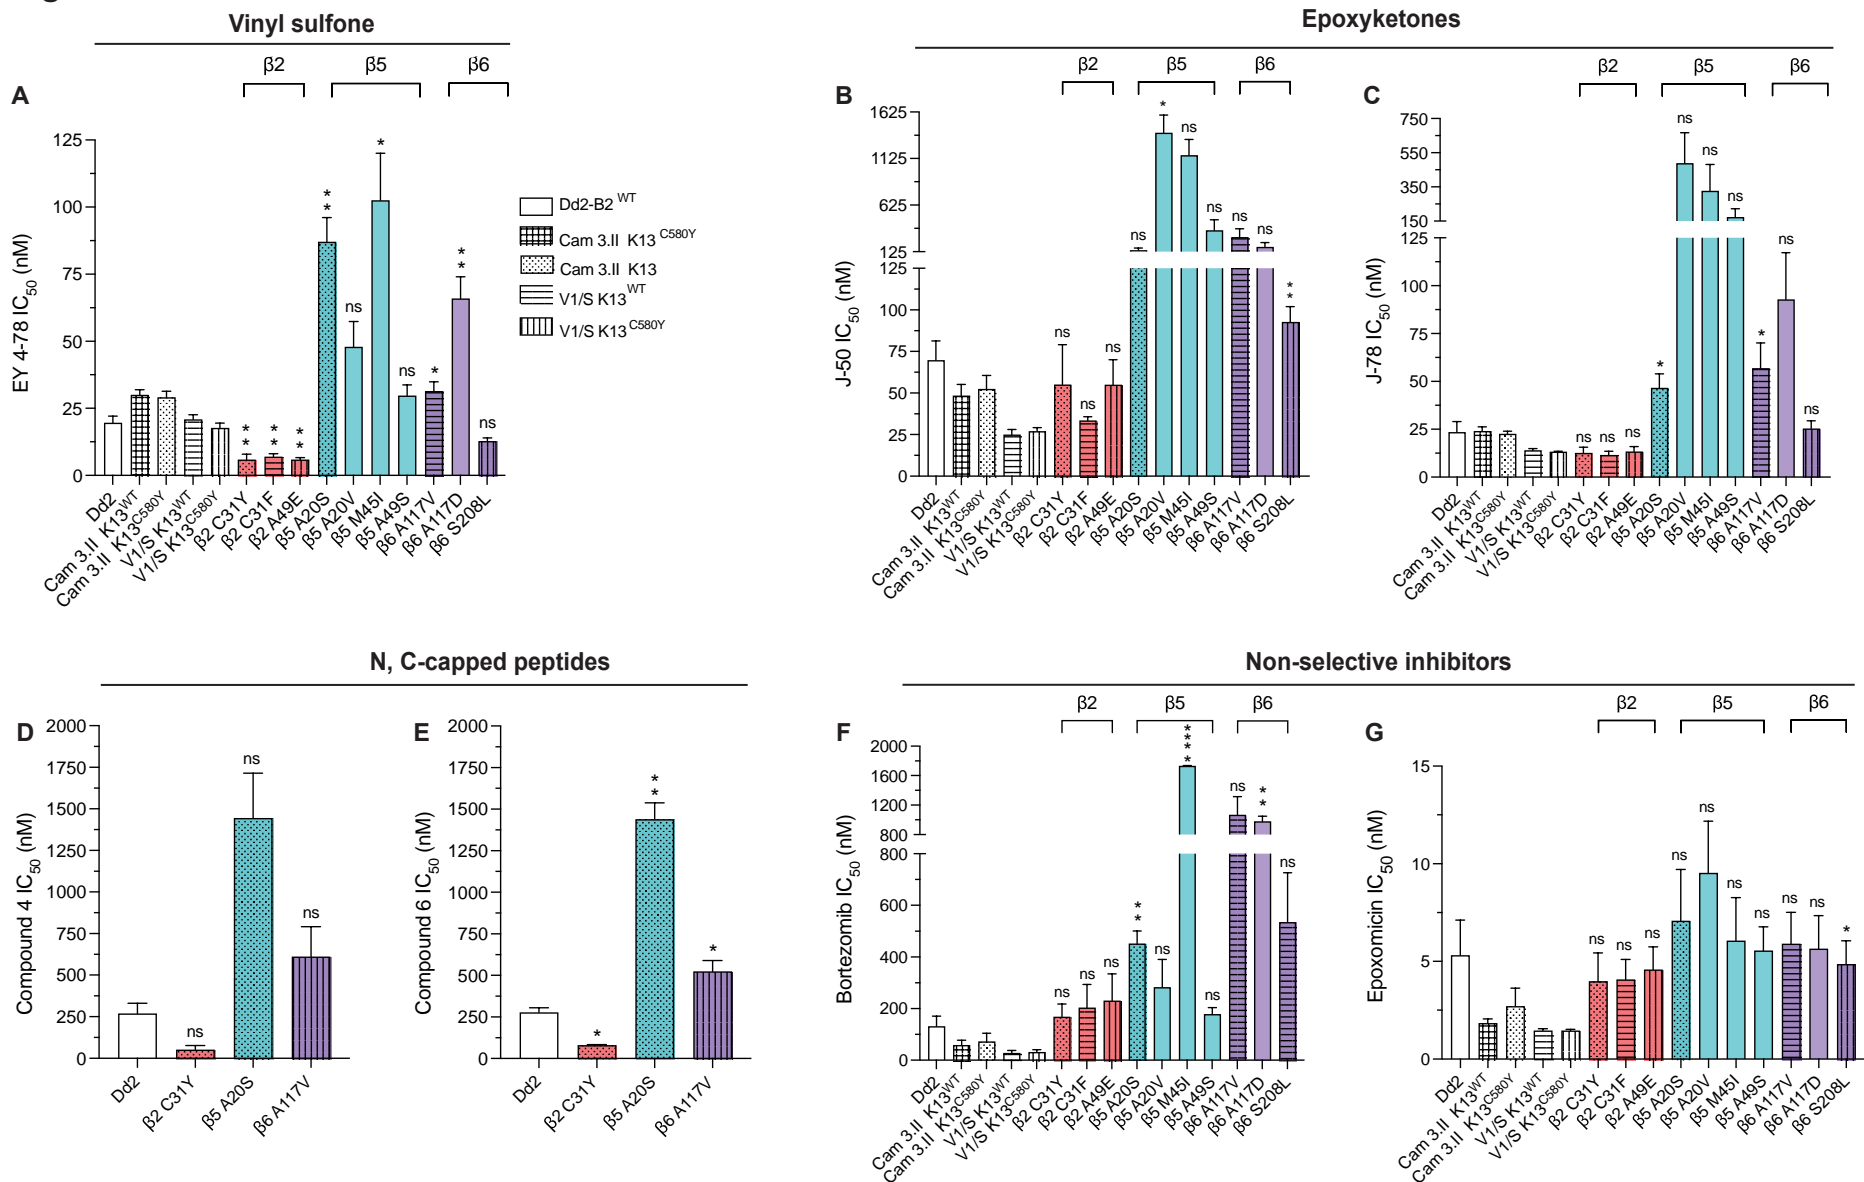

**Figure S3. Profiling of 20S beta subunit mutants against selective and non-selective *Plasmodium* proteasome inhibitors.** IC<sub>50</sub> values for *P. falciparum* 20S proteasome wild-type lines (Dd2, Cam3.II K13<sup>WT</sup>, Cam3.II K13<sup>C580Y</sup>, V1/S K13<sup>WT</sup> and V1/S K13<sup>C580Y</sup>) and mutant lines tested against additional *Plasmodium*-selective and non-selective inhibitors in 72 h dose-response assays, as described in **Figure 1**. Selective compounds tested included **(A)** EY 4-78 (vinyl sulfone), **(B, C)** J-50 and J-78 (epoxyketones), and **(D, E)** Compounds 4 and 6 (N,C-capped peptides). Non-selective inhibitors included **(F)** bortezomib and **(G)** epoxomicin. Results show means  $\pm$  SEM from 3 to 4 independent assays conducted in duplicate (see **Table S1**). Statistical significance was calculated using unpaired *t* tests with Welch's correction, comparing selected lines to their respective parental lines (detailed in **Table 1** and indicated here using hatching patterns specific to each background strain). \**p*<0.05; \*\**p*<0.01; \*\*\**p*<0.001; \*\*\*\**p*<0.0001; ns, not significant.

**Figure S4**

**Vinyl sulfones**

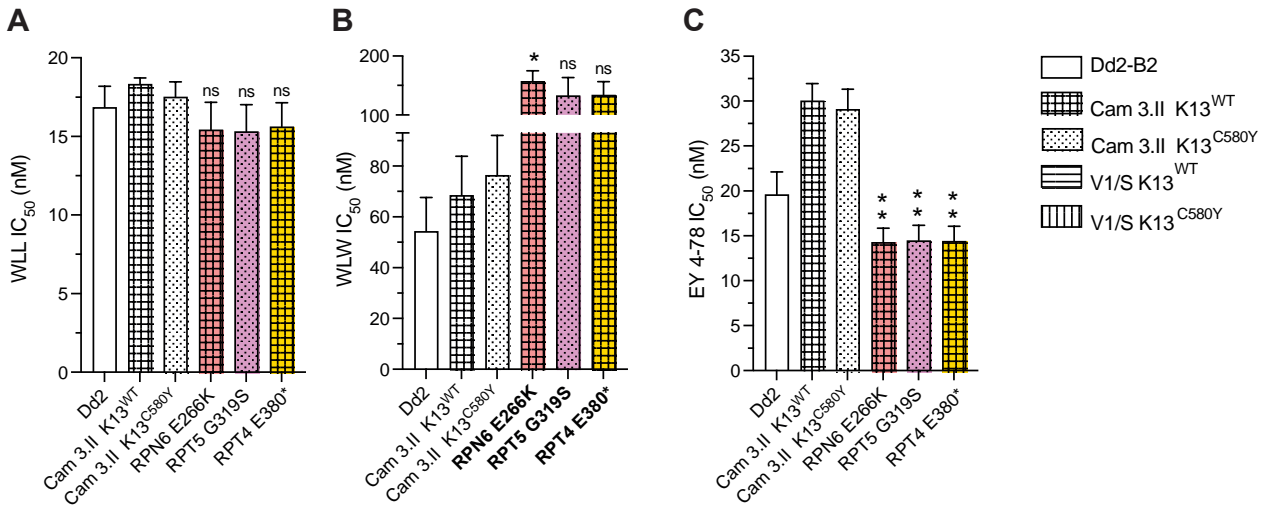

**Epoxyketones**

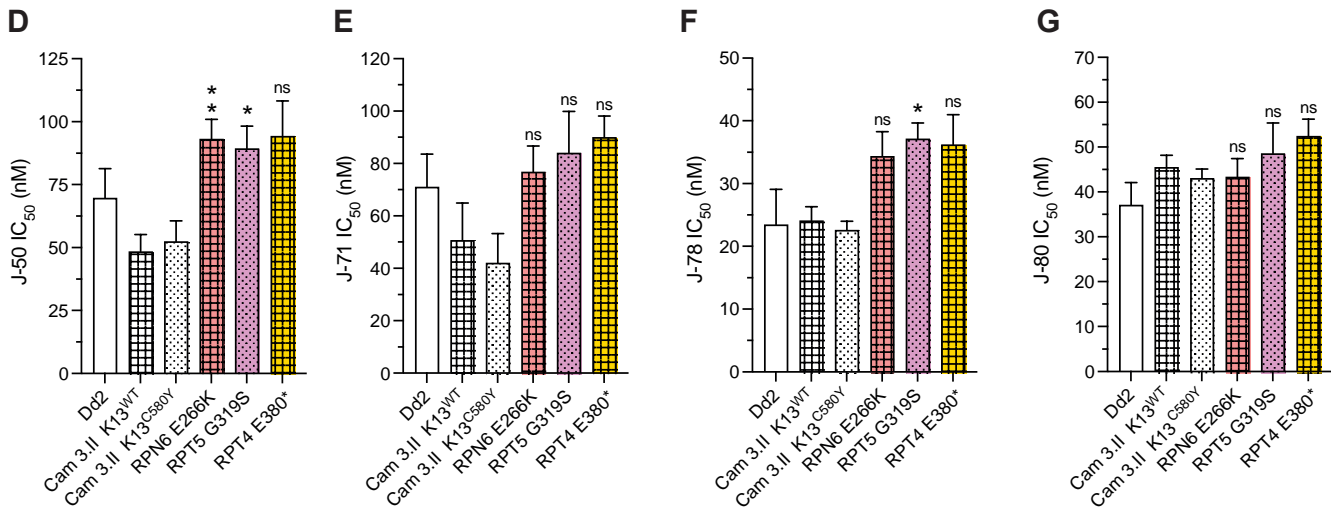

**Asparagine ethylenediamines**

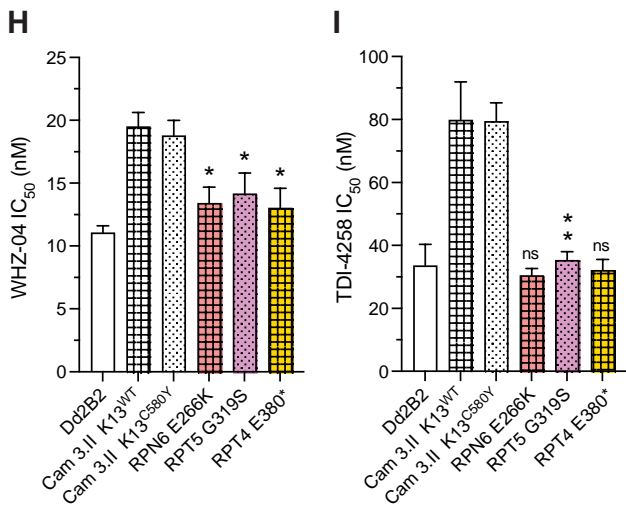

**Non-selective inhibitors**

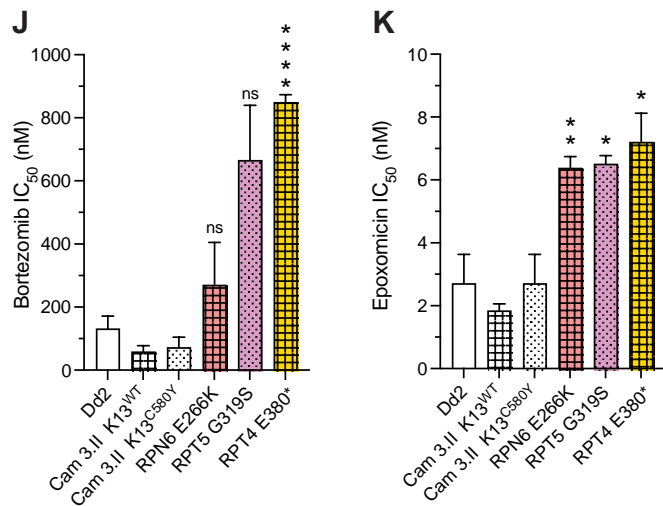



**Figure S4. Profiling of 19S regulatory particle mutants against *Plasmodium*-selective and non-selective proteasome inhibitors.** IC<sub>50</sub> values for *P. falciparum* 19S proteasome wild-type lines (Dd2, Cam3.II K13<sup>WT</sup>, Cam3.II K13<sup>C580Y</sup>, V1/S K13<sup>WT</sup> and V1/S K13<sup>C580Y</sup>) and mutant lines tested against *Plasmodium*-selective and non-selective inhibitors in 72 h dose-response assays, as described in **Figure 1**. Compounds tested included: **(A-C)** WLL, WLW and EY 4-78 (vinyl sulfones), **(D-G)** J-50, J-71, J-78 and J-80 (epoxyketones), **(H, I)** WHZ-04 and TDI-4258 (AsnEDAs), **(J)** bortezomib and **(K)** epoxomicin. Lines indicated in bold were obtained from resistance selection studies with the test compound. Results show means  $\pm$  SEM from 3 to 4 independent assays conducted in duplicate (see **Table S1**). Statistical significance was calculated using unpaired *t* tests with Welch's correction, comparing selected lines to their respective parental lines (detailed in **Table 1** and illustrated here using matched hatching patterns). \**p*<0.05; \*\**p*<0.01; \*\*\**p*<0.001; \*\*\*\**p*<0.0001; ns, not significant.

**Figure S5**

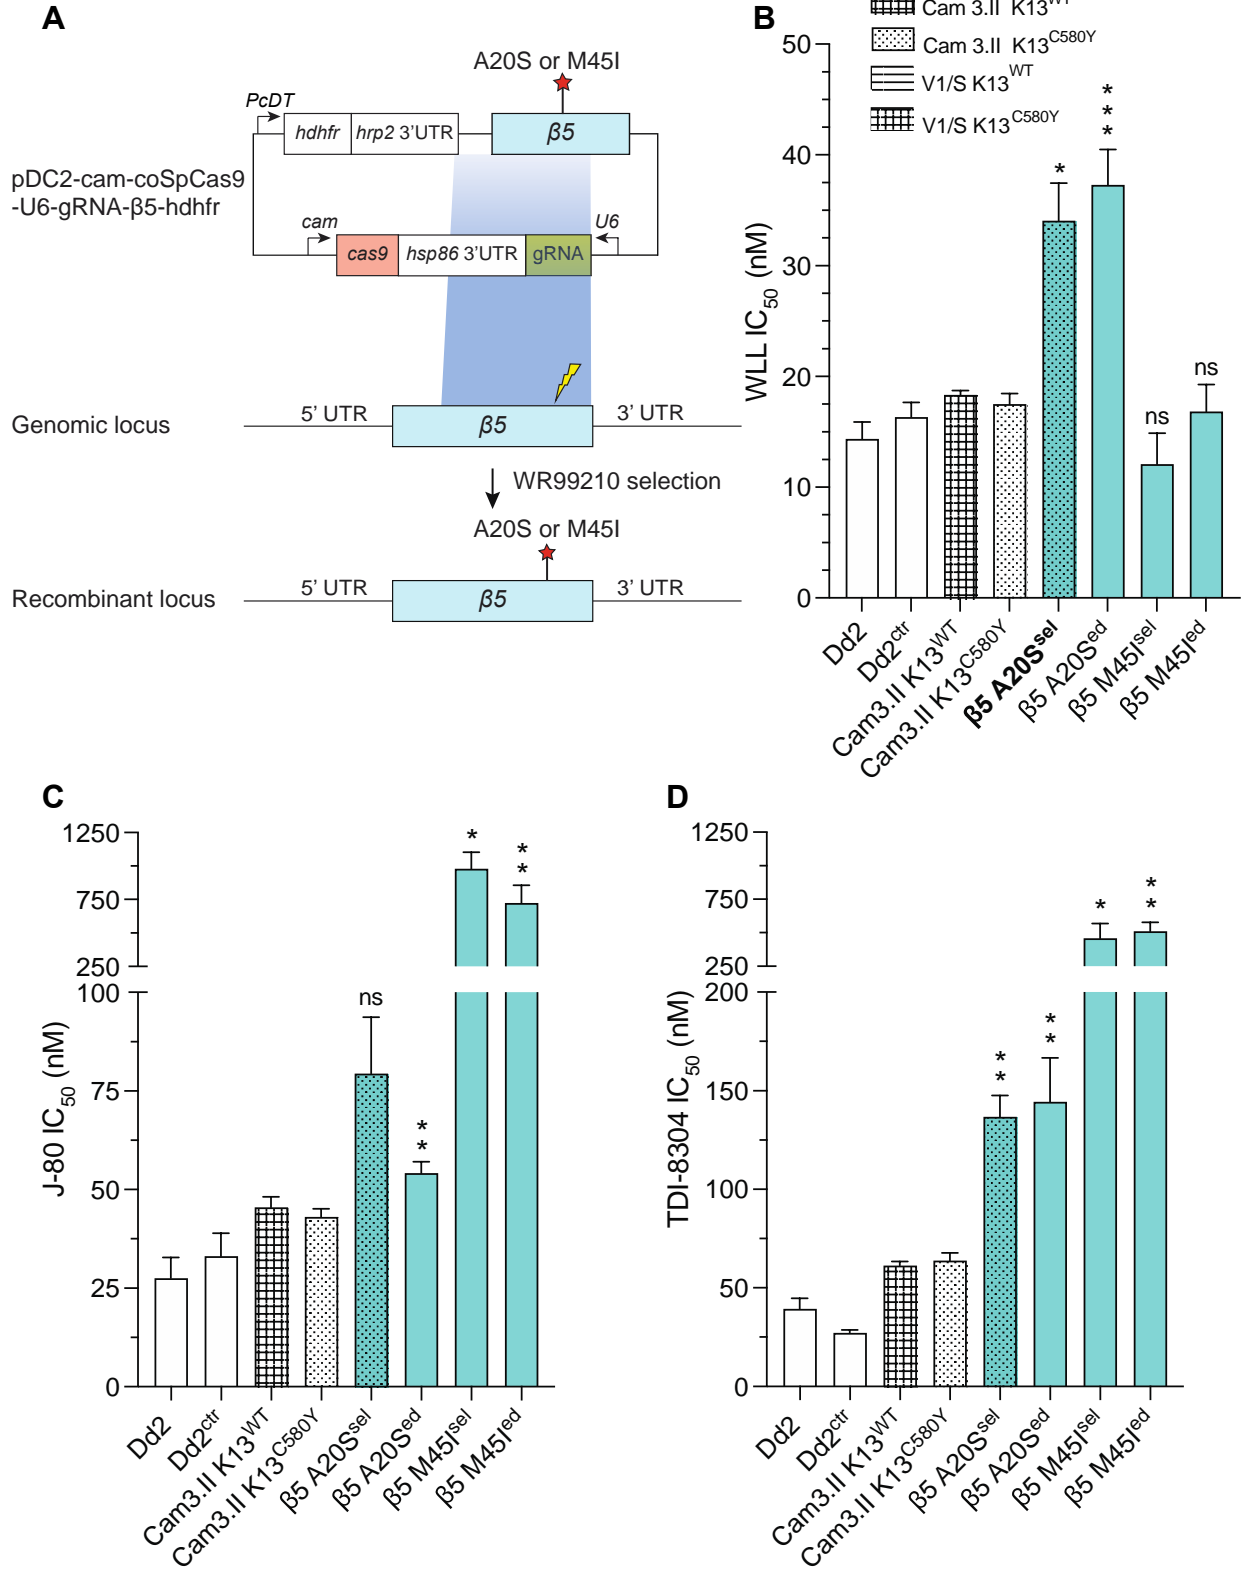

**Figure S5. CRISPR/Cas9-mediated editing of *P. falciparum* 20S  $\beta$ 5 proteasome mutations.** **(A)** Schematic of the CRISPR/Cas9 plasmid used to introduce  $\beta$ 5 point mutations into wild-type Dd2 parasites. This plasmid includes the *Cas9* and the  $\beta$ 5-specific guide RNA (gRNA) expression cassettes (driven by the *calmodulin* and *U6* promoters, respectively), the human dihydrofolate reductase (*dhfr*) selectable marker (driven by the *P. chabaudi dhfrs-ts* (*PcDT*) promoter), and a  $\beta$ 5-specific template for homology-directed repair. **(B-D)**  $IC_{50}$  values for selected or edited  $\beta$ 5 A20S, A20V or M45I, and control (ctr) transgenic lines tested against **(B)** WLL, **(C)** J-80, or **(D)** TDI-8304 in 72 h dose-response assays. Bolded lines were selected for resistance to the test compound. Results show means  $\pm$  SEM from assays conducted on 3 to 5 independent occasions in duplicate (see **Table S4**). Statistical significance was calculated using unpaired *t* tests with Welch's correction, comparing edited lines to the Dd2 parent or selected lines to their respective parental line (detailed in **Table 1** and illustrated here using matched hatching patterns). \* $p < 0.05$ ; \*\* $p < 0.01$ ; \*\*\* $p < 0.001$ ; \*\*\*\* $p < 0.0001$ ; ns, not significant.

**Figure S6**

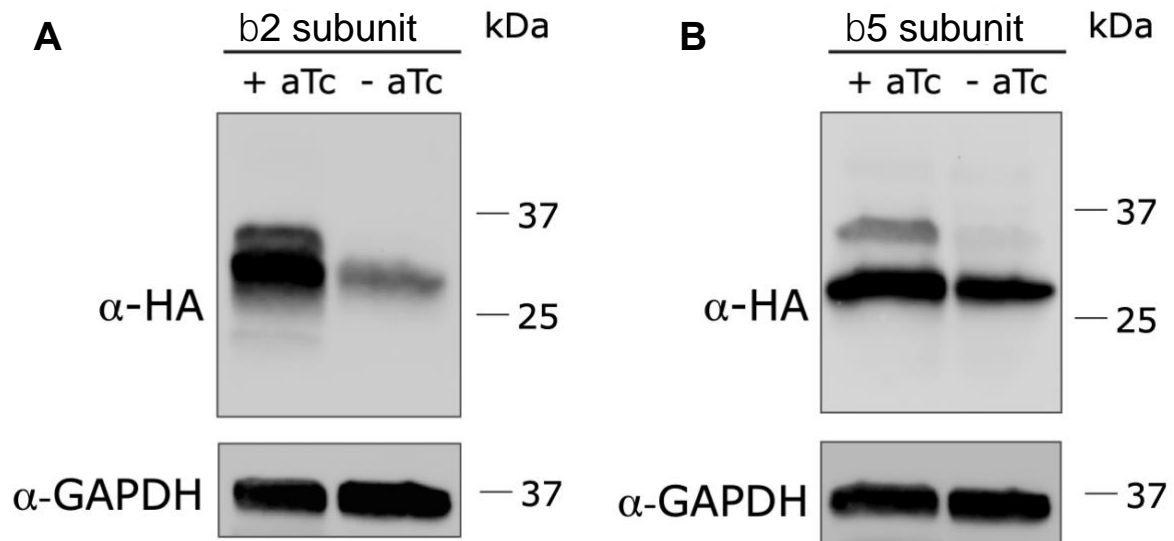

**Figure S6. Conditional knock-down parasites demonstrate essentiality for proteasome  $\beta$ 2 and  $\beta$ 5 subunits.** Western blots of (A)  $\beta$ 2 and (B)  $\beta$ 5 cKD lines cultured in 500 nM (+aTc) or 0 nM aTc (-aTc). Parasites showed minimal residual protein upon aTc removal. The doublet bands for the subunits represent the precursor and mature forms, present as higher and lower molecular weights. These subunits are initially synthesized as inactive precursors with an N-terminal pro-peptide that is cleaved off to form the mature proteins when the complex is fully assembled<sup>1-3</sup>. Antibodies to GAPDH were used to confirm equivalent protein loading across conditions.

**Table S1. IC<sub>50</sub> values (nM) for inhibitor-selected proteasome mutant lines and proteasome wild-type controls.**

| Compounds         | Dd2  |      |   | Cam 3.II K13 <sup>WT</sup> |      |    | Cam 3.II K13 <sup>C580Y</sup> |      |    | V1/S K13 <sup>WT</sup> |      |    | V1/S K13 <sup>C580Y</sup> |     |    | β2 C31Y (Cam3.II K13 <sup>C580Y</sup> ) |             |   |         | β2 C31F (V1/S K13 <sup>WT</sup> ) |             |    |         | β2 A49E (V1/S K13 <sup>C580Y</sup> ) |             |    |         |
|-------------------|------|------|---|----------------------------|------|----|-------------------------------|------|----|------------------------|------|----|---------------------------|-----|----|-----------------------------------------|-------------|---|---------|-----------------------------------|-------------|----|---------|--------------------------------------|-------------|----|---------|
|                   | Mean | SEM  | N | Mean                       | SEM  | N  | Mean                          | SEM  | N  | Mean                   | SEM  | N  | Mean                      | SEM | N  | Mean                                    | SEM         | N | p value | Mean                              | SEM         | N  | p value | Mean                                 | SEM         | N  | p value |
| <b>WLL</b>        | 16.8 | 1.3  | 8 | 18.3                       | 0.4  | 3  | 17.5                          | 1.0  | 3  | 11.4                   | 0.8  | 4  | 11.1                      | 1.0 | 4  | 9.3                                     | 1.8         | 4 | 0.012   | 5.8                               | 1.6         | 4  | 0.029   | 15.9                                 | 1.6         | 4  | 0.047   |
| <b>WLW</b>        | 54.3 | 13.3 | 6 | 68.4                       | 15.4 | 3  | 76.4                          | 15.7 | 3  | 29.5                   | 3.0  | 10 | 25.5                      | 3.2 | 10 | <b>312</b>                              | <b>55.3</b> | 3 | 0.042   | <b>245</b>                        | <b>21.8</b> | 4  | 0.002   | <b>161</b>                           | <b>15.0</b> | 3  | 0.010   |
| <b>EY 4-78</b>    | 19.6 | 2.5  | 4 | 30.0                       | 1.9  | 3  | 29.1                          | 2.2  | 3  | 20.9                   | 1.8  | 4  | 17.7                      | 1.8 | 4  | 5.8                                     | 2.1         | 3 | 0.002   | 7.0                               | 1.1         | 4  | 0.004   | 5.9                                  | 0.7         | 4  | 0.004   |
| <b>J-50</b>       | 69.7 | 11.7 | 6 | 48.5                       | 6.7  | 3  | 52.4                          | 8.2  | 3  | 24.9                   | 3.2  | 4  | 27.0                      | 2.2 | 4  | 55.0                                    | 2.3         | 4 | 0.924   | 33.4                              | 2.3         | 4  | 0.089   | 55.0                                 | 15.1        | 2  | 0.310   |
| <b>J-71</b>       | 71.0 | 12.6 | 8 | 50.7                       | 14.3 | 3  | 42.1                          | 11.2 | 3  | 25.0                   | 2.0  | 4  | 25.8                      | 5.8 | 4  | 25.9                                    | 1.9         | 3 | 0.285   | 47.0                              | 5.6         | 4  | 0.024   | 59.3                                 | 9.1         | 4  | 0.026   |
| <b>J-78</b>       | 23.4 | 5.6  | 5 | 24.1                       | 2.2  | 3  | 22.6                          | 1.4  | 3  | 13.9                   | 1.0  | 4  | 13.3                      | 0.2 | 4  | 12.4                                    | 3.1         | 3 | 0.065   | 11.5                              | 2.0         | 4  | 0.447   | 13.4                                 | 2.6         | 3  | 0.969   |
| <b>J-80</b>       | 37.1 | 5.0  | 5 | 45.5                       | 2.7  | 3  | 43.1                          | 2.1  | 3  | 27.8                   | 3.2  | 4  | 25.5                      | 2.7 | 4  | 17.2                                    | 4.8         | 4 | 0.008   | 17.9                              | 1.0         | 4  | 0.048   | 27.4                                 | 2.8         | 4  | 0.636   |
| <b>WHZ-04</b>     | 11.1 | 0.6  | 6 | 19.5                       | 1.1  | 3  | 18.8                          | 1.2  | 3  | 12.4                   | 1.0  | 4  | 11.7                      | 0.7 | 4  | 2.7                                     | 0.1         | 4 | 0.006   | 3.2                               | 0.2         | 4  | 0.002   | 3.9                                  | 0.5         | 4  | 0.0002  |
| <b>TDI-4258</b>   | 33.6 | 6.7  | 6 | 79.8                       | 12.1 | 2  | 79.4                          | 6.0  | 2  | 54.5                   | 3.3  | 3  | 50.7                      | 4.5 | 3  | 7.1                                     | 1.0         | 4 | 0.001   | 7.7                               | 0.6         | 4  | 0.004   | 9.2                                  | 0.8         | 4  | 0.010   |
| <b>Compound 4</b> | 269  | 61.8 | 2 | --                         | --   | -- | --                            | --   | -- | --                     | --   | -- | --                        | --  | -- | 52.0                                    | 25.0        | 2 | 0.140   | --                                | --          | -- | --      | --                                   | --          | -- | --      |
| <b>Compound 6</b> | 277  | 28.7 | 3 | --                         | --   | -- | --                            | --   | -- | --                     | --   | -- | --                        | --  | -- | 81.0                                    | 3.3         | 3 | 0.020   | --                                | --          | -- | --      | --                                   | --          | -- | --      |
| <b>Bortezomib</b> | 132  | 39.6 | 8 | 59.0                       | 18.1 | 3  | 72.1                          | 32.4 | 2  | 27.9                   | 10.1 | 4  | 31.6                      | 9.1 | 4  | 168                                     | 50.1        | 4 | 0.184   | 204                               | 89.5        | 4  | 0.144   | 231                                  | 104         | 4  | 0.152   |
| <b>Epoxomicin</b> | 5.3  | 1.8  | 7 | 1.8                        | 0.2  | 3  | 2.7                           | 0.9  | 3  | 1.5                    | 0.1  | 4  | 1.5                       | 0.1 | 4  | 4.0                                     | 1.5         | 4 | 0.499   | 4.1                               | 1.0         | 5  | 0.065   | 4.6                                  | 1.2         | 5  | 0.055   |

SEM: standard error of the mean; N: number of biological repeats (with technical duplicates); p values were determined by comparison between the variant lines and their isogenic proteasome wild-type parental lines using unpaired t tests with Welch's correction. Brackets following mutant parasite names indicate the parental line. Mean and SEM values shown in red with bold text indicate the mutations selected with that particular compound.

**Table S1 (continued). IC<sub>50</sub> values (nM) for inhibitor-selected proteasome mutant lines and proteasome wild-type controls.**

| Compounds         | β5 A20S (Cam3.II K13 <sup>CS80Y</sup> ) |            |   |         | β5 A20V (Dd2-B2) |     |    |         | β5 M45I (Dd2-B2) |      |    |         | β5 A49S (Dd2-B2) |             |    |         | β6 A117V (V1/S K13 <sup>WT</sup> ) |            |   |         | β6 A117D (Dd2-B2) |      |    |         | β6 S208L (V1/S K13 <sup>CS80Y</sup> ) |            |    |         |
|-------------------|-----------------------------------------|------------|---|---------|------------------|-----|----|---------|------------------|------|----|---------|------------------|-------------|----|---------|------------------------------------|------------|---|---------|-------------------|------|----|---------|---------------------------------------|------------|----|---------|
|                   | Mean                                    | SEM        | N | p value | Mean             | SEM | N  | p value | Mean             | SEM  | N  | p value | Mean             | SEM         | N  | p value | Mean                               | SEM        | N | p value | Mean              | SEM  | N  | p value | Mean                                  | SEM        | N  | p value |
| <b>WLL</b>        | <b>34.1</b>                             | <b>3.4</b> | 3 | 0.032   | 7.4              | 0.8 | 3  | 0.000   | 12.1             | 2.8  | 3  | 0.222   | 3.7              | 0.7         | 3  | <0.0001 | <b>34.8</b>                        | <b>2.5</b> | 4 | 0.001   | 18.3              | 2.4  | 4  | 0.612   | <b>21.7</b>                           | <b>1.9</b> | 4  | 0.005   |
| <b>WLW</b>        | 22.7                                    | 3.0        | 3 | 0.071   | 6.9              | 1.9 | 4  | 0.016   | 18.8             | 0.4  | 3  | 0.044   | 9.0              | 2.4         | 4  | 0.018   | 165                                | 24.4       | 4 | 0.001   | 10.1              | 3.8  | 3  | 0.020   | 45.0                                  | 3.19       | 2  | 0.015   |
| <b>EY 4-78</b>    | 87.1                                    | 9.0        | 4 | 0.006   | 47.9             | 9.4 | 3  | 0.087   | 103              | 17.6 | 3  | 0.040   | 29.8             | 4.0         | 2  | 0.176   | 31.5                               | 3.5        | 4 | 0.048   | 65.9              | 8.1  | 4  | 0.008   | 12.8                                  | 1.2        | 4  | 0.071   |
| <b>J-50</b>       | 140                                     | 24.3       | 3 | 0.058   | 1,402            | 190 | 3  | 0.020   | 1,160            | 170  | 2  | 0.097   | 355              | 113         | 3  | 0.127   | 280                                | 90.0       | 2 | 0.216   | 175               | 46.5 | 4  | 0.106   | 92.7                                  | 9.3        | 4  | 0.005   |
| <b>J-71</b>       | 139                                     | 16.0       | 4 | 0.004   | 1,004            | 235 | 4  | 0.028   | 539              | 186  | 3  | 0.128   | 430              | 162         | 3  | 0.157   | 142                                | 12.8       | 4 | 0.002   | 187               | 29.0 | 4  | 0.020   | 70.7                                  | 3.6        | 3  | 0.002   |
| <b>J-78</b>       | 46.7                                    | 7.2        | 4 | 0.042   | 488              | 179 | 3  | 0.122   | 327              | 155  | 2  | 0.300   | 174              | 48.0        | 3  | 0.087   | 56.9                               | 13.2       | 4 | 0.018   | 92.8              | 24.5 | 4  | 0.063   | 25.3                                  | 4.12       | 4  | 0.061   |
| <b>J-80</b>       | 79.4                                    | 14.3       | 4 | 0.083   | 927              | 142 | 4  | 0.008   | 979              | 124  | 3  | 0.016   | 317              | 132         | 3  | 0.167   | 123                                | 16.5       | 4 | 0.009   | 441               | 44.6 | 4  | 0.003   | 39.1                                  | 3.5        | 4  | 0.024   |
| <b>WHZ-04</b>     | 229                                     | 6.1        | 3 | 0.001   | 4,619            | 714 | 2  | 0.098   | 547              | 120  | 2  | 0.141   | 101              | 11.9        | 4  | 0.005   | 13.6                               | 1.7        | 4 | 0.591   | 213               | 26.1 | 4  | 0.005   | 7.4                                   | 0.6        | 4  | 0.005   |
| <b>TDI-4258</b>   | 525                                     | 41.2       | 4 | 0.001   | >10,000          | --  | 4  | --      | 1344             | 112  | 2  | 0.054   | <b>151</b>       | <b>19.2</b> | 4  | 0.005   | 16.2                               | 1.0        | 4 | 0.004   | 4,200             | 482  | 3  | 0.013   | 18.9                                  | 1.0        | 4  | 0.016   |
| <b>Compound 4</b> | 1,445                                   | 269        | 2 | 0.129   | --               | --  | -- | --      | --               | --   | -- | --      | --               | --          | -- | --      | 611                                | 181        | 2 | 0.286   | --                | --   | -- | --      | --                                    | --         | -- | --      |
| <b>Compound 6</b> | 1,440                                   | 99.0       | 3 | 0.004   | --               | --  | -- | --      | --               | --   | -- | --      | --               | --          | -- | --      | 523                                | 66         | 3 | 0.047   | --                | --   | -- | --      | --                                    | --         | -- | --      |
| <b>Bortezomib</b> | 452                                     | 49.1       | 4 | 0.003   | 283              | 108 | 6  | 0.234   | 1,732            | 4.5  | 2  | <0.0001 | 178              | 25.9        | 4  | 0.348   | 1,067                              | 248        | 3 | 0.052   | 980               | 69.7 | 3  | 0.001   | 535                                   | 192        | 3  | 0.119   |
| <b>Epoxomicin</b> | 7.1                                     | 2.6        | 4 | 0.180   | 9.5              | 2.7 | 5  | 0.228   | 6.1              | 2.2  | 4  | 0.798   | 5.6              | 1.2         | 4  | 0.916   | 5.9                                | 1.6        | 5 | 0.050   | 5.6               | 1.7  | 5  | 0.897   | 4.9                                   | 1.2        | 5  | 0.046   |

SEM: standard error of the mean; N: number of biological repeats (with technical duplicates); p values were determined by comparison between the variant lines and their isogenic proteasome wild-type parental lines using unpaired t tests with Welch's correction. Brackets following mutant parasite names indicate the parental line. Mean and SEM values shown in red with bold text indicate the mutations selected with that particular compound. Other mutations were selected with compounds not assayed herein: b5 A20V was selected using MMV1579506; b5 M45I was selected using MPI-12; b6 A117D was selected using PKS21004.

**Table S2. IC<sub>50</sub> fold shifts (nM) for inhibitor-selected proteasome mutant lines relative to their respective parental lines.**

| Compounds         | $\beta$ 2 C31Y | $\beta$ 2 C31F | $\beta$ 2 A49E | $\beta$ 5 A20S | $\beta$ 5 A20V | $\beta$ 5 M45I | $\beta$ 5 A49S | $\beta$ 6 A117V | $\beta$ 6 A117D | $\beta$ 6 S208L |
|-------------------|----------------|----------------|----------------|----------------|----------------|----------------|----------------|-----------------|-----------------|-----------------|
|                   | fold shift     | fold shift     | fold shift     | fold shift     | fold shift     | fold shift     | fold shift     | fold shift      | fold shift      | fold shift      |
| <b>WLL</b>        | 0.53           | 0.51           | 1.4            | <b>1.9</b>     | 0.44           | 0.72           | 0.22           | <b>3.1</b>      | 1.1             | <b>2.0</b>      |
| <b>WLW</b>        | <b>4.1</b>     | <b>8.3</b>     | <b>6.3</b>     | 0.30           | 0.13           | 0.35           | 0.17           | 5.6             | 0.19            | 1.8             |
| <b>EY 4-78</b>    | 0.20           | 0.33           | 0.33           | 3.0            | 2.4            | 5.2            | 1.5            | 1.5             | 3.4             | 0.72            |
| <b>J-50</b>       | 1.0            | 1.3            | 2.0            | 2.7            | 20.1           | 16.6           | 5.1            | 11.2            | 2.5             | 3.4             |
| <b>J-71</b>       | 0.62           | 1.9            | 2.3            | 3.3            | 14.1           | 7.6            | 6.1            | 5.7             | 2.6             | 2.7             |
| <b>J-78</b>       | 0.55           | 0.83           | 1.0            | 2.1            | 20.8           | 13.9           | 7.4            | 4.1             | 4.0             | 1.9             |
| <b>J-80</b>       | 0.40           | 0.64           | 1.1            | 1.8            | 25.0           | 26.4           | 8.5            | 4.4             | 11.9            | 1.5             |
| <b>WHZ-04</b>     | 0.14           | 0.26           | 0.33           | 12.2           | 418            | 49.5           | 9.1            | 1.1             | 19.2            | 0.63            |
| <b>TDI-4258</b>   | 0.09           | 0.14           | 0.18           | 6.6            | >300           | 40.0           | <b>4.5</b>     | 0.30            | 125             | 0.37            |
| <b>Compound 4</b> | 0.23           | -              | -              | 5.2            | -              | -              | -              | 2.4             | -               | -               |
| <b>Compound 6</b> | 0.27           | -              | -              | 4.5            | -              | -              | -              | 1.9             | -               | -               |
| <b>Bortezomib</b> | 2.3            | 7.3            | 7.3            | 6.3            | 2.1            | 13.1           | 1.3            | 38.2            | 7.4             | 16.9            |
| <b>Epoxomicin</b> | 1.5            | 2.8            | 3.1            | 2.6            | 1.8            | 1.1            | 1.0            | 4.1             | 1.1             | 3.3             |

Parental lines for each mutant are listed in Table 1. Fold shifts were calculated using mean values documented in Table S1. Values shown in red with bold text indicate the mutations selected with that particular compound. Other mutations were selected with compounds not assayed herein: b5 A20V was selected using MMV1579506; b5 M45I was selected using MPI-12; b6 A117D was selected using PKS21004.

**Table S3. IC<sub>50</sub> values (nM) for inhibitor-selected proteasome mutant lines and proteasome wild-type controls.**

| Compounds         | Dd2  |      |   | Cam 3.II K13 <sup>WT</sup> |      |   | Cam 3.II K13 <sup>C580Y</sup> |      |   | RPN6 E266K |             |          |         | RPT5 G319S |             |   |         | RPT4 E380* |             |   |         |
|-------------------|------|------|---|----------------------------|------|---|-------------------------------|------|---|------------|-------------|----------|---------|------------|-------------|---|---------|------------|-------------|---|---------|
|                   | Mean | SEM  | N | Mean                       | SEM  | N | Mean                          | SEM  | N | Mean       | SEM         | N        | p value | Mean       | SEM         | N | p value | Mean       | SEM         | N | p value |
| <b>WLL</b>        | 16.8 | 1.3  | 8 | 18.3                       | 0.4  | 3 | 17.5                          | 1.0  | 3 | 15.4       | 1.7         | 4        | 0.193   | 15.3       | 1.7         | 4 | 0.175   | 15.6       | 1.5         | 4 | 0.174   |
| <b>WLW</b>        | 54.3 | 13.3 | 6 | 68.4                       | 15.4 | 3 | 76.4                          | 15.7 | 3 | <b>157</b> | <b>17.7</b> | <b>4</b> | 0.019   | <b>133</b> | <b>30.6</b> | 4 | 0.169   | <b>134</b> | <b>22.4</b> | 3 | 0.111   |
| <b>EY 4-78</b>    | 19.6 | 2.5  | 4 | 30.0                       | 1.9  | 3 | 29.1                          | 2.2  | 3 | 14.3       | 1.6         | 4        | 0.002   | 14.5       | 1.7         | 4 | 0.006   | 14.4       | 1.6         | 3 | 0.004   |
| <b>J-50</b>       | 69.7 | 11.7 | 6 | 48.5                       | 6.7  | 3 | 52.4                          | 8.2  | 3 | 93.2       | 7.8         | 4        | 0.007   | 89.3       | 8.9         | 4 | 0.015   | 94.3       | 14.0        | 3 | 0.063   |
| <b>J-71</b>       | 71.0 | 12.6 | 8 | 50.7                       | 14.3 | 3 | 42.1                          | 11.2 | 3 | 76.8       | 9.9         | 4        | 0.210   | 84.0       | 15.9        | 4 | 0.085   | 90.0       | 8.1         | 3 | 0.092   |
| <b>J-78</b>       | 23.4 | 5.6  | 5 | 24.1                       | 2.2  | 3 | 22.6                          | 1.4  | 3 | 28.6       | 6.4         | 4        | 0.101   | 30.0       | 7.3         | 4 | 0.014   | 36.2       | 4.8         | 3 | 0.111   |
| <b>J-80</b>       | 37.1 | 5.0  | 5 | 45.5                       | 2.7  | 3 | 43.1                          | 2.1  | 3 | 43.3       | 4.1         | 4        | 0.674   | 48.6       | 6.8         | 4 | 0.698   | 52.4       | 3.8         | 3 | 0.220   |
| <b>WHZ-04</b>     | 11.1 | 0.6  | 6 | 19.5                       | 1.1  | 3 | 18.8                          | 1.2  | 3 | 13.4       | 1.3         | 4        | 0.016   | 14.2       | 1.7         | 4 | 0.046   | 13.0       | 1.6         | 4 | 0.020   |
| <b>TDI-4258</b>   | 33.6 | 6.7  | 6 | 79.8                       | 12.1 | 2 | 79.4                          | 6.0  | 2 | 30.4       | 2.3         | 4        | 0.143   | 35.3       | 2.7         | 4 | 0.002   | 32.1       | 3.4         | 4 | 0.1365  |
| <b>Bortezomib</b> | 132  | 39.6 | 8 | 59.0                       | 18.1 | 3 | 72.1                          | 32.4 | 2 | 270        | 134         | 3        | 0.276   | 666        | 174         | 3 | 0.072   | 850        | 23.7        | 3 | 0.002   |
| <b>Epoxomicin</b> | 5.3  | 1.8  | 7 | 1.8                        | 0.2  | 3 | 2.7                           | 0.9  | 3 | 4.5        | 1.2         | 5        | 0.001   | 5.0        | 1.0         | 5 | 0.045   | 6.1        | 1.3         | 4 | 0.023   |

SEM: standard error of the mean; N: number of biological repeats (with technical duplicates); *p* values were determined by comparison between the variant lines and their isogenic proteasome wild-type parental lines using unpaired t tests with Welch's correction. Values shown in red with bold text indicate the mutations selected with that particular compound.



**Table S4. IC<sub>50</sub> values (nM) for CRISPR/Cas9-edited proteasome mutant lines compared with selected lines and proteasome wild-type controls.**

| Compound        | Dd2  |     |    | Dd2 <sup>ctr</sup> |     |   |                | Cam 3.II K13 <sup>WT</sup> |     |   | Cam 3.II K13 <sup>C580Y</sup> |     |   | β5 A20S <sup>sel</sup> |            |   |                |
|-----------------|------|-----|----|--------------------|-----|---|----------------|----------------------------|-----|---|-------------------------------|-----|---|------------------------|------------|---|----------------|
|                 | Mean | SEM | N  | Mean               | SEM | N | <i>p</i> value | Mean                       | SEM | N | Mean                          | SEM | N | Mean                   | SEM        | N | <i>p</i> value |
| <b>WLL</b>      | 14.4 | 1.5 | 9  | 16.3               | 1.3 | 5 | 0.506          | 18.3                       | 0.4 | 3 | 17.5                          | 1.0 | 3 | <b>34.1</b>            | <b>3.4</b> | 3 | 0.032          |
| <b>J-80</b>     | 27.5 | 5.3 | 5  | 33.0               | 5.9 | 4 | 0.511          | 45.5                       | 2.7 | 3 | 43.1                          | 2.1 | 3 | 79.4                   | 14.3       | 4 | 0.083          |
| <b>TDI-8304</b> | 39.3 | 5.5 | 11 | 27.2               | 1.5 | 5 | 0.055          | 61.4                       | 2.0 | 4 | 63.9                          | 3.9 | 4 | 137                    | 10.7       | 4 | 0.004          |

**Table S4 (continued). IC<sub>50</sub> values (nM) for CRISPR/Cas9-edited proteasome mutant lines compared with selected lines and proteasome wild-type controls.**

| Compound        | β5 A20S <sup>ed</sup> |            |   |                | β5 M45I <sup>sel</sup> |     |   |                | β5 M45I <sup>ed</sup> |      |   |                | β5 A20V <sup>sel</sup> |      |   |                | β5 A20V <sup>ed</sup> |      |   |                |
|-----------------|-----------------------|------------|---|----------------|------------------------|-----|---|----------------|-----------------------|------|---|----------------|------------------------|------|---|----------------|-----------------------|------|---|----------------|
|                 | Mean                  | SEM        | N | <i>p</i> value | Mean                   | SEM | N | <i>p</i> value | Mean                  | SEM  | N | <i>p</i> value | Mean                   | SEM  | N | <i>p</i> value | Mean                  | SEM  | N | <i>p</i> value |
| <b>WLL</b>      | <b>37.3</b>           | <b>3.2</b> | 5 | 0.001          | 12.1                   | 2.8 | 3 | 0.519          | 16.8                  | 2.4  | 5 | 0.417          | 7.4                    | 0.8  | 3 | 0.003          | 12.4                  | 2.1  | 2 | 0.751          |
| <b>J-80</b>     | 54.1                  | 2.9        | 5 | 0.004          | 979                    | 124 | 3 | 0.016          | 722                   | 134  | 5 | 0.007          | 985                    | 97.2 | 6 | 0.0002         | 1,597                 | 486  | 3 | 0.048          |
| <b>TDI-8304</b> | 144                   | 22.3       | 5 | 0.008          | 460                    | 108 | 6 | 0.011          | 512                   | 66.0 | 4 | 0.005          | 1,140                  | 75.6 | 3 | 0.005          | 1,201                 | 28.8 | 3 | 0.0004         |

SEM, standard error of the mean; N, number of biological repeats (with technical duplicates). β5 A20S<sup>sel</sup>: *P. falciparum* lines generated from selections with WLL. β5 M45I<sup>sel</sup>: *P. falciparum* lines generated from selections with MPI-12. β5 A20S<sup>ed</sup> and β5 M45I<sup>ed</sup>: *P. falciparum* lines generated by introducing β5 A20S and β5 M45I mutations into parental Dd2 (B2 clone) using CRISPR/Cas9. Dd2-B2<sup>ctr</sup>: *P. falciparum* line generated by introducing wild type β5 sequence into parental Dd2-B2 using CRISPR/Cas9. *p* values were determined by comparing the shift in IC<sub>50</sub> between the variant lines and parental Dd2-B2 using unpaired t tests with Welch's correction. These values were generated as a separate set from those reported in Table S1. Values shown in red with bold text indicate the mutation selected with that particular compound.

**Table S5. IC<sub>50</sub> values (nM) for 20S proteasome β2 and β5 conditional knockdown lines.**

| Compounds          | β2 conditional knockdown |     |   |           |     |   |         |           |      |   | β5 conditional knockdown |      |     |           |      |     |   |           |      |     |   |         |
|--------------------|--------------------------|-----|---|-----------|-----|---|---------|-----------|------|---|--------------------------|------|-----|-----------|------|-----|---|-----------|------|-----|---|---------|
|                    | 50 nM aTc                |     |   | 20 nM aTc |     |   |         | 15 nM aTc |      |   | 50 nM aTc                |      |     | 20 nM aTc |      |     |   | 10 nM aTc |      |     |   |         |
|                    | Mean                     | SEM | N | Mean      | SEM | N | p value | Mean      | SEM  | N | p value                  | Mean | SEM | N         | Mean | SEM | N | p value   | Mean | SEM | N | p value |
| <b>WLL</b>         | 7.5                      | 0.6 | 4 | 5.6       | 0.2 | 4 | 0.049   | 3.0       | 0.4  | 4 | 0.002                    | 8.3  | 0.6 | 4         | 7.1  | 0.5 | 5 | 0.146     | 4.1  | 0.3 | 5 | 0.001   |
| <b>EY 4-78</b>     | 9.3                      | 0.7 | 4 | 4.6       | 0.4 | 4 | 0.000   | 3.2       | 0.7  | 4 | 0.001                    | 7.6  | 0.2 | 4         | 6.3  | 0.4 | 4 | 0.038     | 4.5  | 0.2 | 4 | <0.0001 |
| <b>J-71</b>        | 32.0                     | 0.7 | 4 | 14.0      | 1.5 | 4 | 0.000   | 8.3       | 1.3  | 4 | <0.0001                  | 24.2 | 1.2 | 4         | 23.8 | 2.1 | 4 | 0.873     | 11.6 | 1.1 | 4 | 0.000   |
| <b>J-80</b>        | 20.1                     | 1.4 | 4 | 7.2       | 0.7 | 4 | 0.001   | 3.5       | 1.3  | 4 | 0.0001                   | 13.1 | 0.7 | 4         | 12.3 | 0.5 | 4 | 0.384     | 4.8  | 1.1 | 4 | 0.001   |
| <b>TDI-8304</b>    | 24.0                     | 0.6 | 4 | 11.9      | 0.4 | 4 | <0.0001 | 7.8       | 0.7  | 4 | <0.0001                  | 10.3 | 0.4 | 4         | 10.1 | 0.5 | 4 | 0.685     | 5.8  | 0.3 | 4 | 0.0002  |
| <b>Chloroquine</b> | 2.7                      | 0.2 | 4 | 3.0       | 0.2 | 4 | 0.394   | 3.3       | 0.25 | 2 | 0.199                    | 4.7  | 0.6 | 4         | 4.9  | 0.4 | 4 | 0.789     | 4.9  | 0.4 | 4 | 0.683   |

Conditional knockdown lines were generated in NF54 parasites (unlike the selection and gene editing studies performed in other strains and reported in separate tables). SEM: standard error of the mean; N: number of biological repeats (with technical duplicates). *p* values were determined by comparing the IC<sub>50</sub> values of parasites cultured under 10, 15 or 20 nM aTc (to cause a partial knockdown) with those cultured at 50 nM (no knockdown), using unpaired t tests with Welch's correction.

**Table S6. IC<sub>50</sub> values (nM) for inhibitor-selected proteasome mutant lines and proteasome wild-type control.**

| Compounds       | Dd2  |     |    | β5 M45R    |            |   |         | β5 M45V    |             |   |         | β5 A50V    |            |   |         | β6 N151Y    |            |   |         | β6 S157L      |              |   |         |
|-----------------|------|-----|----|------------|------------|---|---------|------------|-------------|---|---------|------------|------------|---|---------|-------------|------------|---|---------|---------------|--------------|---|---------|
|                 | Mean | SEM | N  | Mean       | SEM        | N | p value | Mean       | SEM         | N | p value | Mean       | SEM        | N | p value | Mean        | SEM        | N | p value | Mean          | SEM          | N | p value |
| <b>J-71</b>     | 33.8 | 2.3 | 16 | 288        | 30.0       | 4 | 0.003   | 369        | 35.0        | 4 | 0.002   | <b>104</b> | <b>5.5</b> | 4 | 0.0002  | 24.1        | 2.2        | 4 | 0.013   | 71.4          | 5.7          | 4 | 0.003   |
| <b>J-80</b>     | 23.0 | 1.7 | 11 | <b>807</b> | <b>129</b> | 4 | 0.004   | <b>266</b> | <b>21.7</b> | 4 | 0.002   | 69.4       | 4.4        | 4 | 0.001   | 16.8        | 2.8        | 4 | 0.138   | 123           | 9.9          | 4 | 0.000   |
| <b>TDI-8304</b> | 13.3 | 0.7 | 9  | 3.7        | 0.9        | 4 | <0.0001 | 8,800      | 372         | 3 | 0.002   | 25.6       | 1.0        | 3 | <0.0001 | <b>22.0</b> | <b>1.1</b> | 4 | 0.002   | <b>34,858</b> | <b>3,617</b> | 5 | 0.001   |
| <b>WLL</b>      | 11.9 | 0.6 | 11 | 6.3        | 0.5        | 4 | <0.0001 | 6.9        | 0.5         | 4 | <0.0001 | 11.7       | 0.6        | 4 | 0.850   | 8.2         | 0.8        | 4 | 0.008   | 12.0          | 1.0          | 4 | 0.925   |
| <b>EY 4-78</b>  | 22.1 | 1.6 | 11 | 30.6       | 3.8        | 4 | 0.104   | 116        | 11.4        | 4 | 0.003   | 23.3       | 3.9        | 4 | 0.788   | 11.9        | 2.3        | 4 | 0.011   | 159           | 8.0          | 4 | 0.0003  |

SEM: standard error of the mean; N: number of biological repeats (with technical duplicates). β6 S157L and β6 N151Y: *P. falciparum* lines generated from selections with TDI-8304. β5 A50V: *P. falciparum* line generated from selections with J-71. β5 M45V and β5 M45R: *P. falciparum* lines (F2 D9 and F3 A2, respectively) generated from selections with J-80. *p* values were determined by comparing the shift in IC<sub>50</sub> between the variant lines and parental Dd2-B2 using unpaired t tests with Welch's correction. This data set was generated separately from the data reported in Table S1. Values shown in red with bold text indicate the mutations selected with that particular compound.

**Table S7. IC<sub>50</sub> fold shifts (nM) for selected proteasome mutant lines relative to their parental line Dd2-B2.**

| Compounds       | β5 M45R     | β5 M45V     | β5 A50V    | β6 N151Y   | β6 S157L     |
|-----------------|-------------|-------------|------------|------------|--------------|
|                 | fold shift  | fold shift  | fold shift | fold shift | fold shift   |
| <b>J-71</b>     | 8.5         | 10.9        | <b>3.1</b> | 0.71       | 2.1          |
| <b>J-80</b>     | <b>35.1</b> | <b>11.6</b> | 3.0        | 0.73       | 5.3          |
| <b>TDI-8304</b> | 0.28        | 662         | 1.9        | <b>1.7</b> | <b>2,621</b> |
| <b>WLL</b>      | 0.53        | 0.58        | 0.98       | 0.69       | 1.0          |
| <b>EY 4-78</b>  | 1.4         | 5.2         | 1.1        | 0.54       | 7.2          |

Fold shifts were calculated using mean values documented in Table S6. Values shown in red with bold text indicate the mutations selected with that particular compound.

**Table S8. Oligonucleotides employed in this study.**

| Name | Nucleotide sequence (5'-3')                                  | Description                                                  | Lab name |
|------|--------------------------------------------------------------|--------------------------------------------------------------|----------|
| p1   | TATTATATTAGGAACAATGGCAGG                                     | $\beta$ 5 gRNA 1 BbsI fwd (gRNA for gene editing)            | p8349    |
| p2   | AAACCCTGCCATTGTTCCCTAATAT                                    | $\beta$ 5 gRNA 1 BbsI rev (gRNA for gene editing)            | p8350    |
| p3   | TATTTAAAAGATCCCATAGATGCT                                     | $\beta$ 5 gRNA 2 BbsI fwd (gRNA for gene editing)            | p8351    |
| p4   | AAACAGCATCTATGGGATCTTTTA                                     | $\beta$ 5 gRNA 2 BbsI rev (gRNA for gene editing)            | p8352    |
| p5   | AGAGGTACCGAGCTCGAATTCATGGTAATAGCAAGTGATGAAAGC                | $\beta$ 5 gs3226 InFusion EcoRI fwd (donor for gene editing) | p8394    |
| p6   | CGAAAAGTGCCACCTGACGTCGAATCTAAAATAGAATAAGCATATGTACTACC        | $\beta$ 5 gs3226 InFusion AatII rev (donor for gene editing) | p8395    |
| p7   | GTACGGTACAAACCCGGAATTCGAGCTCGGATTTATATCTGTAGAGAAGATGCATAAGT  | $\beta$ 2 RHR fwd (cKD)                                      | NA       |
| p8   | GGGTATTAGACCTAGGGATAACAGGGTAATCCTTGAGATATTAAACTACAATAAAAAACA | $\beta$ 2 RHR rev (cKD)                                      | NA       |
| p9   | TTATATGGGATACATCCCCA                                         | $\beta$ 2 gRNA target site (cKD)                             | NA       |
| p10  | GTACGGTACAAACCCGGAATTCGAGCTCGGACAAAAGGATCAATATGTTATGTGAA     | $\beta$ 5 RHR fwd (cKD)                                      | NA       |
| p11  | GGGTATTAGACCTAGGGATAACAGGGTAATGGCTAGTCCATAACATTACCT          | $\beta$ 5 RHR rev (cKD)                                      | NA       |
| p12  | TTTAGAGATGGTGGTTCAGG                                         | $\beta$ 5 gRNA target site (cKD)                             | NA       |

cKD, conditional knock-down. Fwd, forward. Rev, reverse. RHR, right homology region. NA, not applicable (cloning performed in the Niles Lab).

## Supplementary References

1. Seemuller, E., Lupas, A., and Baumeister, W. (1996). Autocatalytic processing of the 20S proteasome. *Nature* 382, 468-471.
2. Chen, P., and Hochstrasser, M. (1996). Autocatalytic subunit processing couples active site formation in the 20S proteasome to completion of assembly. *Cell* 86, 961-972.
3. Le Tallec, B., Barrault, M.B., Courbeyrette, R., Guerois, R., Marsolier-Kergoat, M.C., and Peyroche, A. (2007). 20S proteasome assembly is orchestrated by two distinct pairs of chaperones in yeast and in mammals. *Mol. Cell* 27, 660-674.
